# Supplementary material for: Phytochemical Analysis of the Fruits of Sea Buckthorn (Hippophae rhamnoides): Identification of Organic Acid Derivatives
Source: MDPI journal article supplement (doi:10.3390/plants10050860), 2021-04-24
Supplement: s1 [file s1]

## Supplementary Material

### Phytochemical Analysis of the Fruits of Sea Buckthorn (*Hippophae rhamnoides*):

#### Identification of Organic Acid Derivatives

Yong Hoon Lee <sup>1,†</sup>, Hee Joo Jang <sup>1,†</sup>, Kun Hee Park <sup>2</sup>, Seon-Hee Kim <sup>3</sup>, Jung Kyu Kim <sup>4</sup>, Jin-Chul Kim <sup>5</sup>, Tae Su Jang <sup>6,\*</sup>, and Ki Hyun Kim <sup>1,\*</sup>

<sup>1</sup> School of Pharmacy, Sungkyunkwan University, Suwon 16419, Republic of Korea; yhl2090@naver.com (Y.H.L.); dhnl01200@naver.com (H.J.J.)

<sup>2</sup> Department of Food Science and Biotechnology, Sungkyunkwan University, Suwon 16419; Republic of Korea; soske@skku.edu (K.H.P.)

<sup>3</sup> Sungkyun Biotech Co., Ltd., Suwon, Gyeonggi-do, 16419, Republic of Korea; seonhee31@gmail.com (S.H.K.)

<sup>4</sup> School of Chemical Engineering, Sungkyunkwan University, Suwon, Gyeonggi-do, 16419, Republic of Korea; legkim@skku.edu (J.K.K.)

<sup>5</sup> KIST Gangneung Institute of Natural products, Natural Product Informatics Research Center, Gangneung, 25451, Republic of Korea; jckim@kist.re.kr (J.C.K.)

<sup>6</sup> College of Medicine, Dankook University, Cheonan 31116, Republic of Korea

\* Correspondence: jangts@dankook.ac.kr (T.S.J.); khkim83@skku.edu (K.H.K.); Tel.: +82-41-550-1476 (T.S.J.); +82-31-290-7700 (K.H.K.)

† These authors contributed equally to this study.

## Supporting Information Contents:

**Figure S1.** HR-ESIMS data of **3**

**Figure S2.**  $^1\text{H}$  NMR spectrum of **3** ( $\text{CD}_3\text{OD}$ , 700 MHz)

**Figure S3.**  $^1\text{H}$ - $^1\text{H}$  COSY spectrum of **3** ( $\text{CD}_3\text{OD}$ )

**Figure S4.** HSQC spectrum of **3** ( $\text{CD}_3\text{OD}$ )

**Figure S5.** HMBC spectrum of **3** ( $\text{CD}_3\text{OD}$ )

**Figure S6.** HR-ESIMS data of **4**

**Figure S7.**  $^1\text{H}$  NMR spectrum of **4** ( $\text{CD}_3\text{OD}$ , 700 MHz)

**Figure S8.**  $^1\text{H}$ - $^1\text{H}$  COSY spectrum of **4** ( $\text{CD}_3\text{OD}$ )

**Figure S9.** HSQC spectrum of **4** ( $\text{CD}_3\text{OD}$ )

**Figure S10.** HMBC spectrum of **4** ( $\text{CD}_3\text{OD}$ )

**Figure S11.** HR-ESIMS data of **6**

**Figure S12.**  $^1\text{H}$  NMR spectrum of **6** ( $\text{CD}_3\text{OD}$ , 700 MHz)

**Figure S13.**  $^1\text{H}$ - $^1\text{H}$  COSY spectrum of **6** ( $\text{CD}_3\text{OD}$ )

**Figure S14.** HSQC spectrum of **6** ( $\text{CD}_3\text{OD}$ )

**Figure S15.** HMBC spectrum of **6** ( $\text{CD}_3\text{OD}$ )

**Table S1.** Gibbs free energies and Boltzmann distribution of conformers **3S** (3S)

**Table S2.** Gibbs free energies and Boltzmann distribution of conformers **4S** (3S)

**Table S3.** Gibbs free energies and Boltzmann distribution of conformers **6S** (3S)

**Cartesian coordinates of conformers of 1 for Tables S1-S3**

Figure S1. HR-ESIMS data of **3**

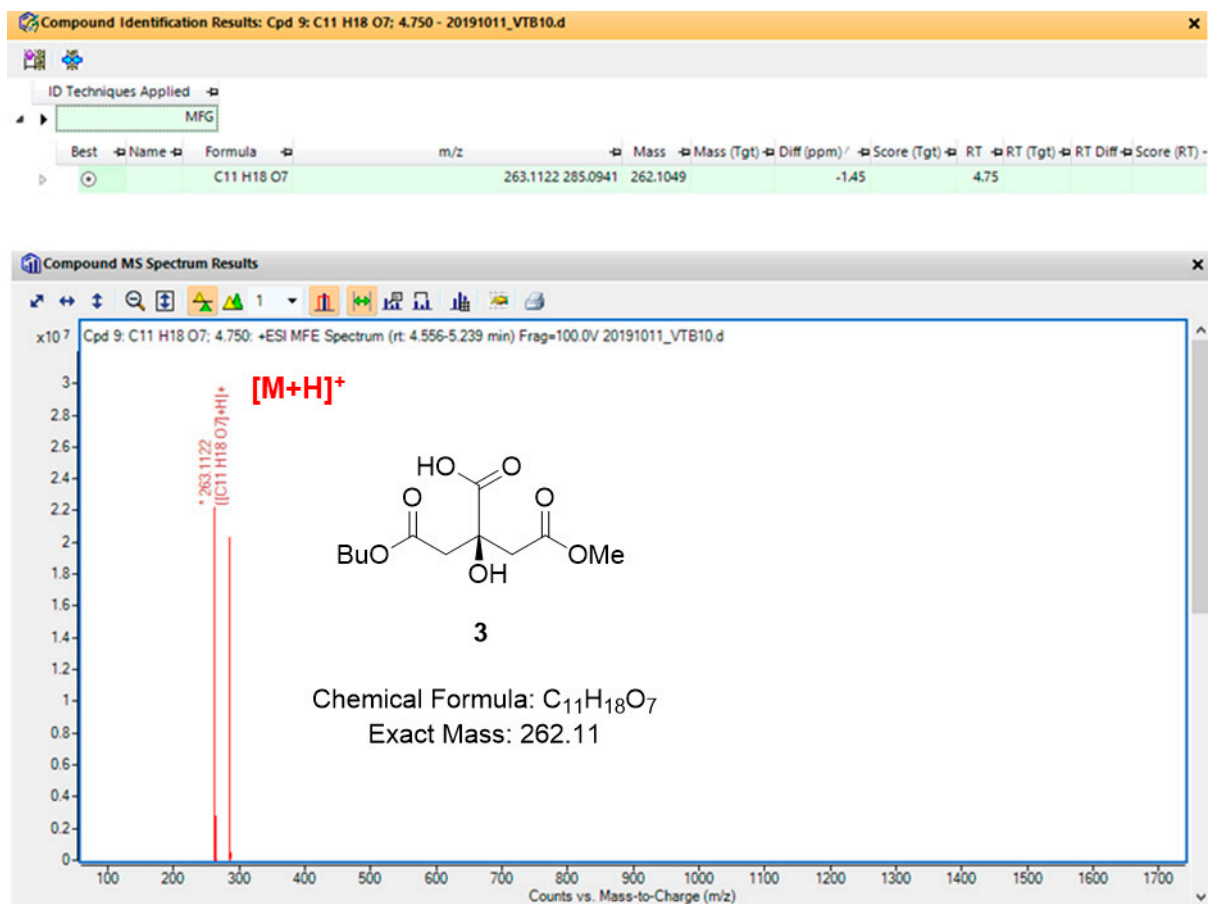

**Figure S2.**  $^1\text{H}$  NMR spectrum of **3** ( $\text{CD}_3\text{OD}$ , 700 MHz)

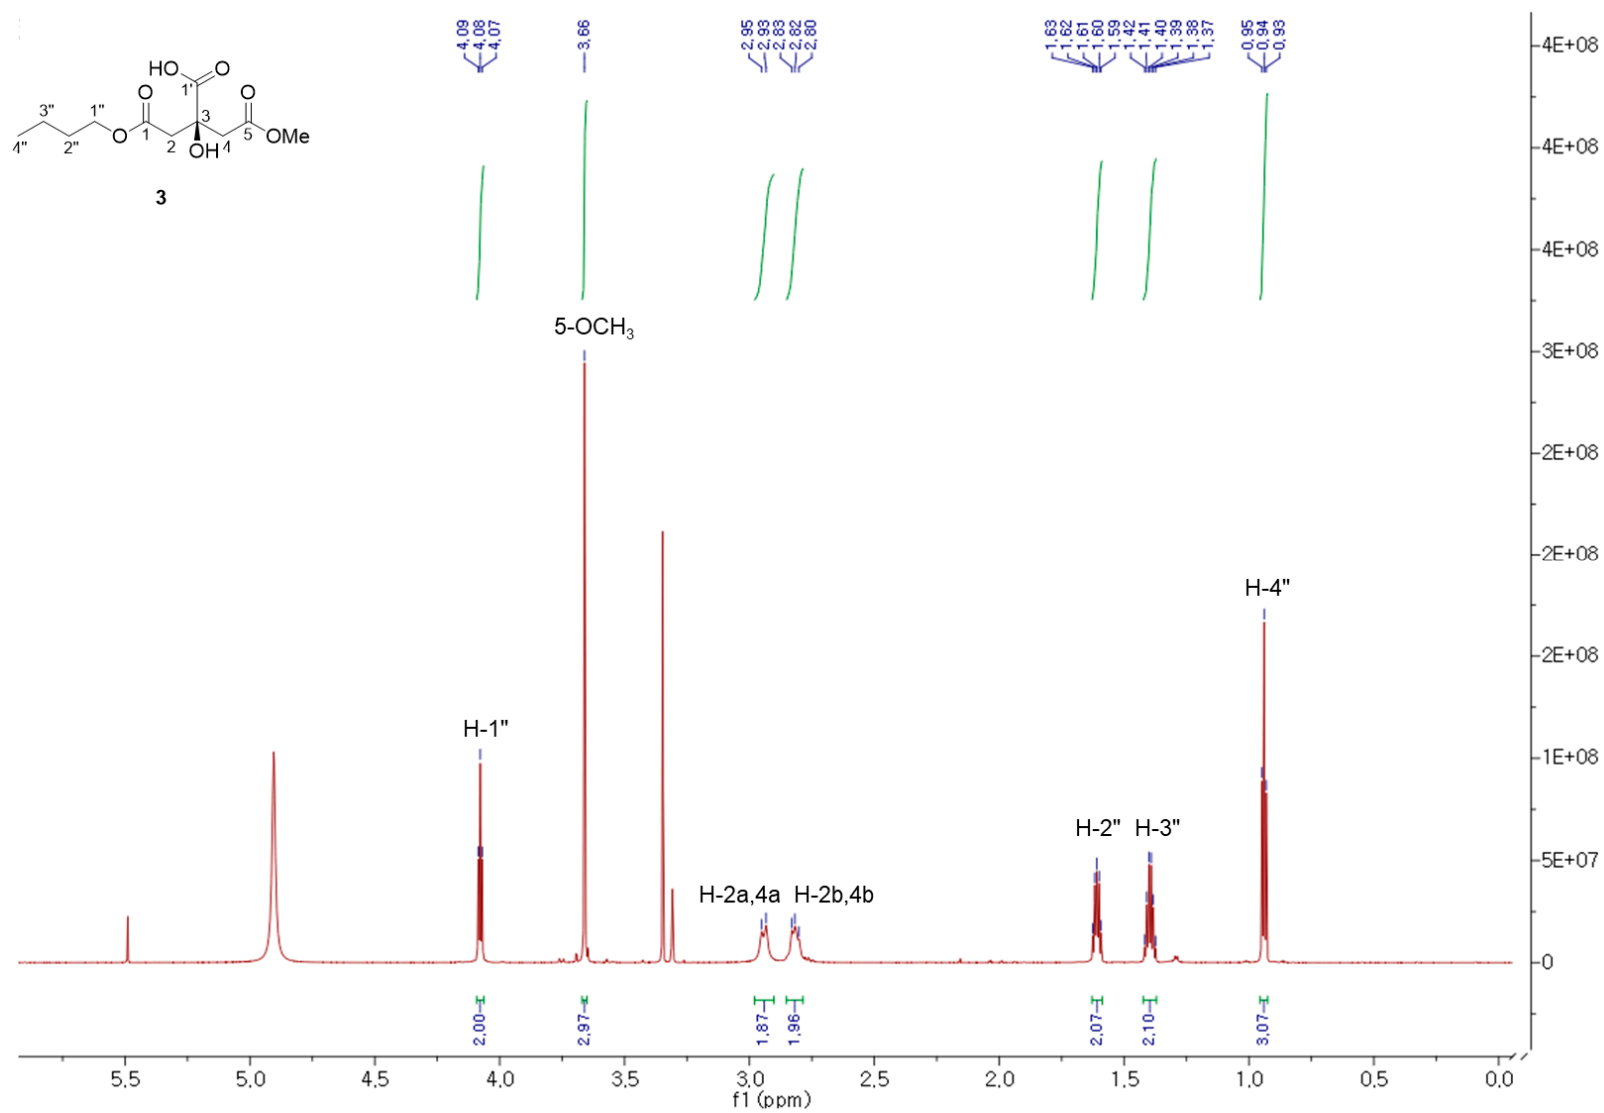

**Figure S3.**  $^1\text{H}$ - $^1\text{H}$  COSY spectrum of **3** ( $\text{CD}_3\text{OD}$ )

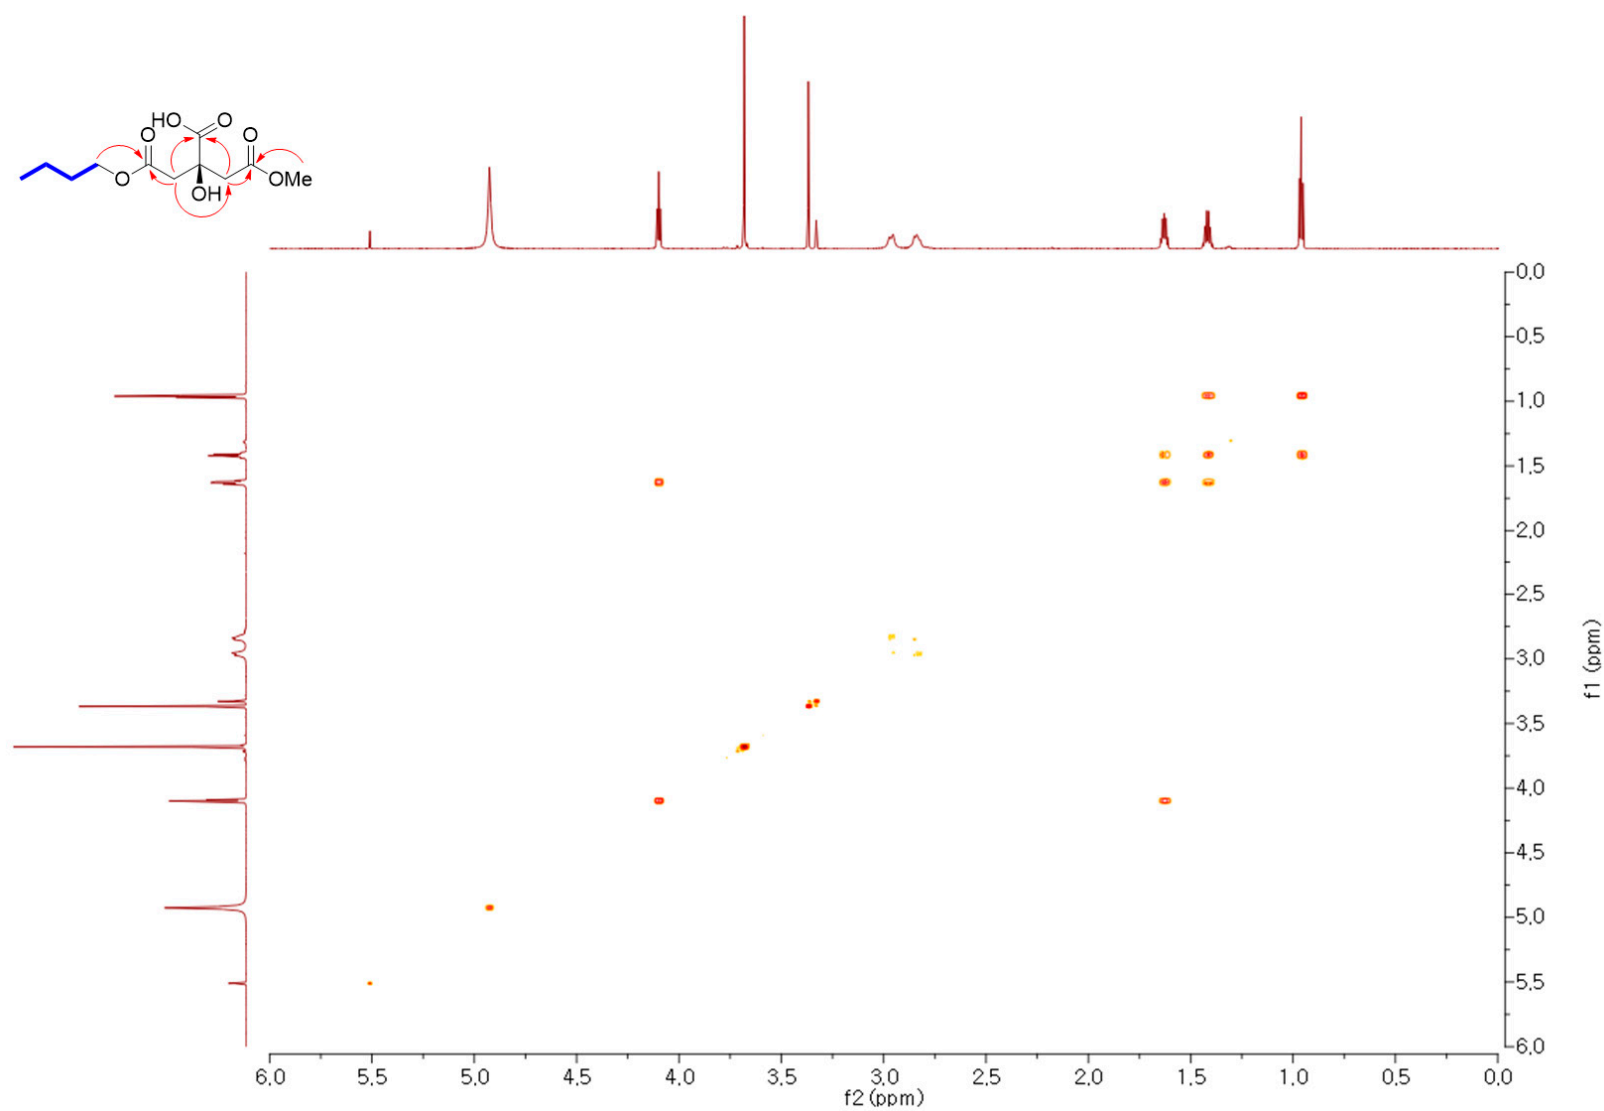

**Figure S4.** HSQC spectrum of **3** (CD<sub>3</sub>OD)

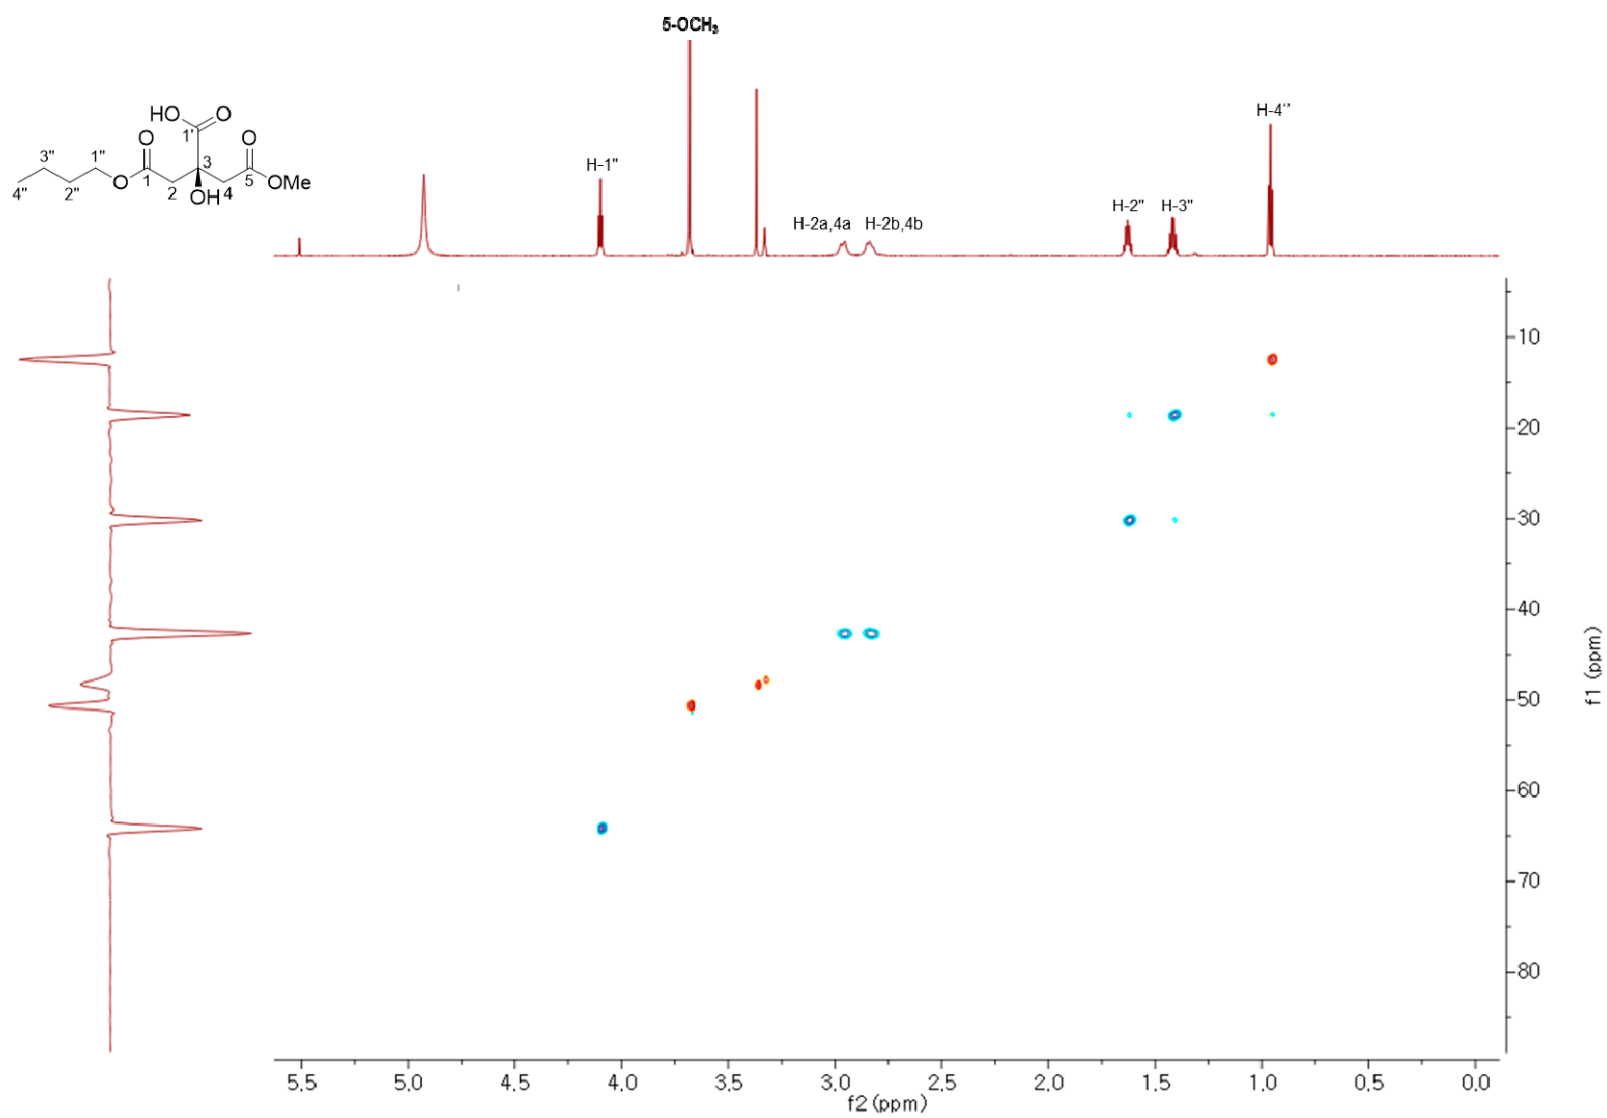

**Figure S5.** HMBC spectrum of **3** (CD<sub>3</sub>OD)

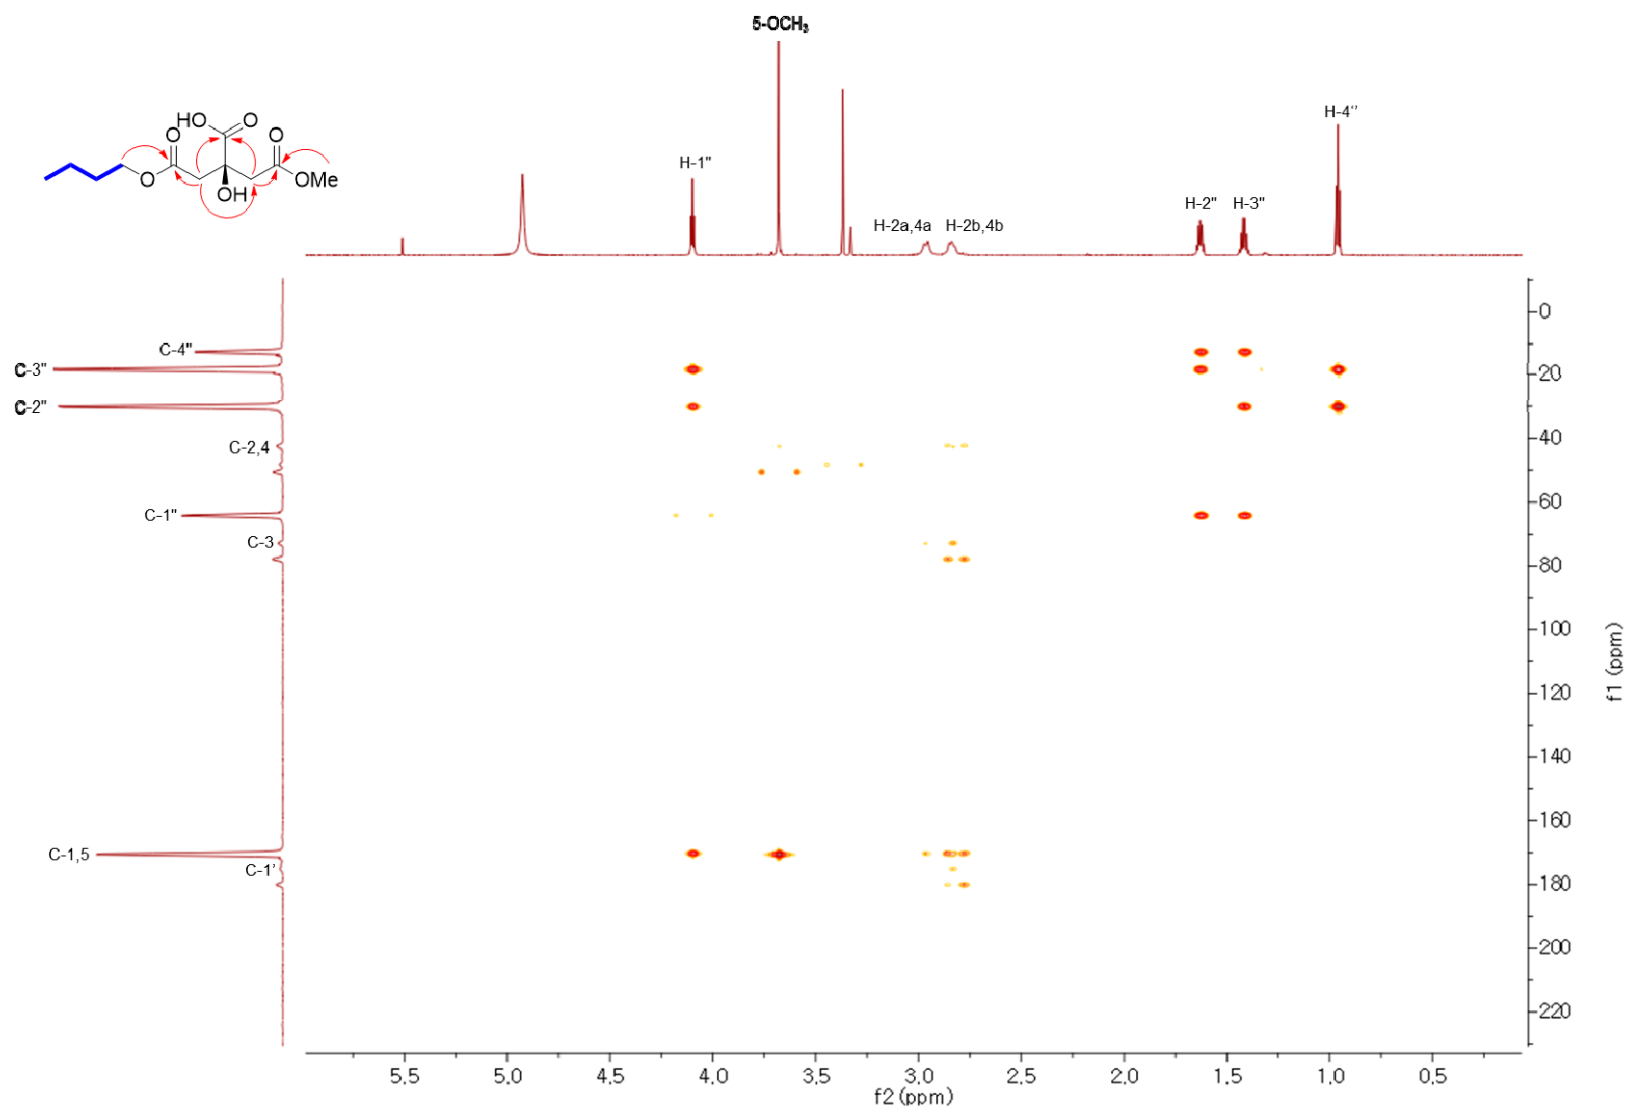

Figure S6. HR-ESIMS data of 4

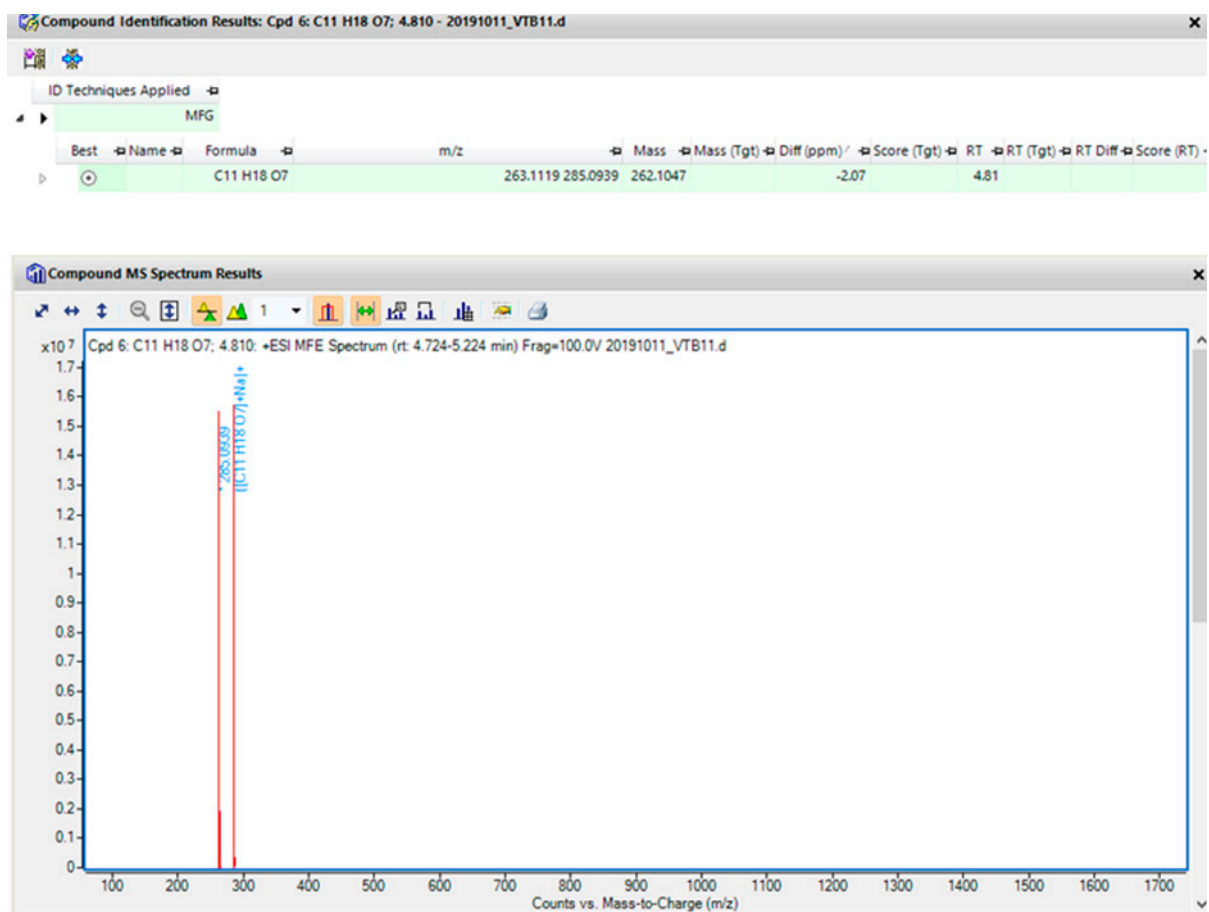



**Figure S7.**  $^1\text{H}$  NMR spectrum of **4** ( $\text{CD}_3\text{OD}$ , 700 MHz)

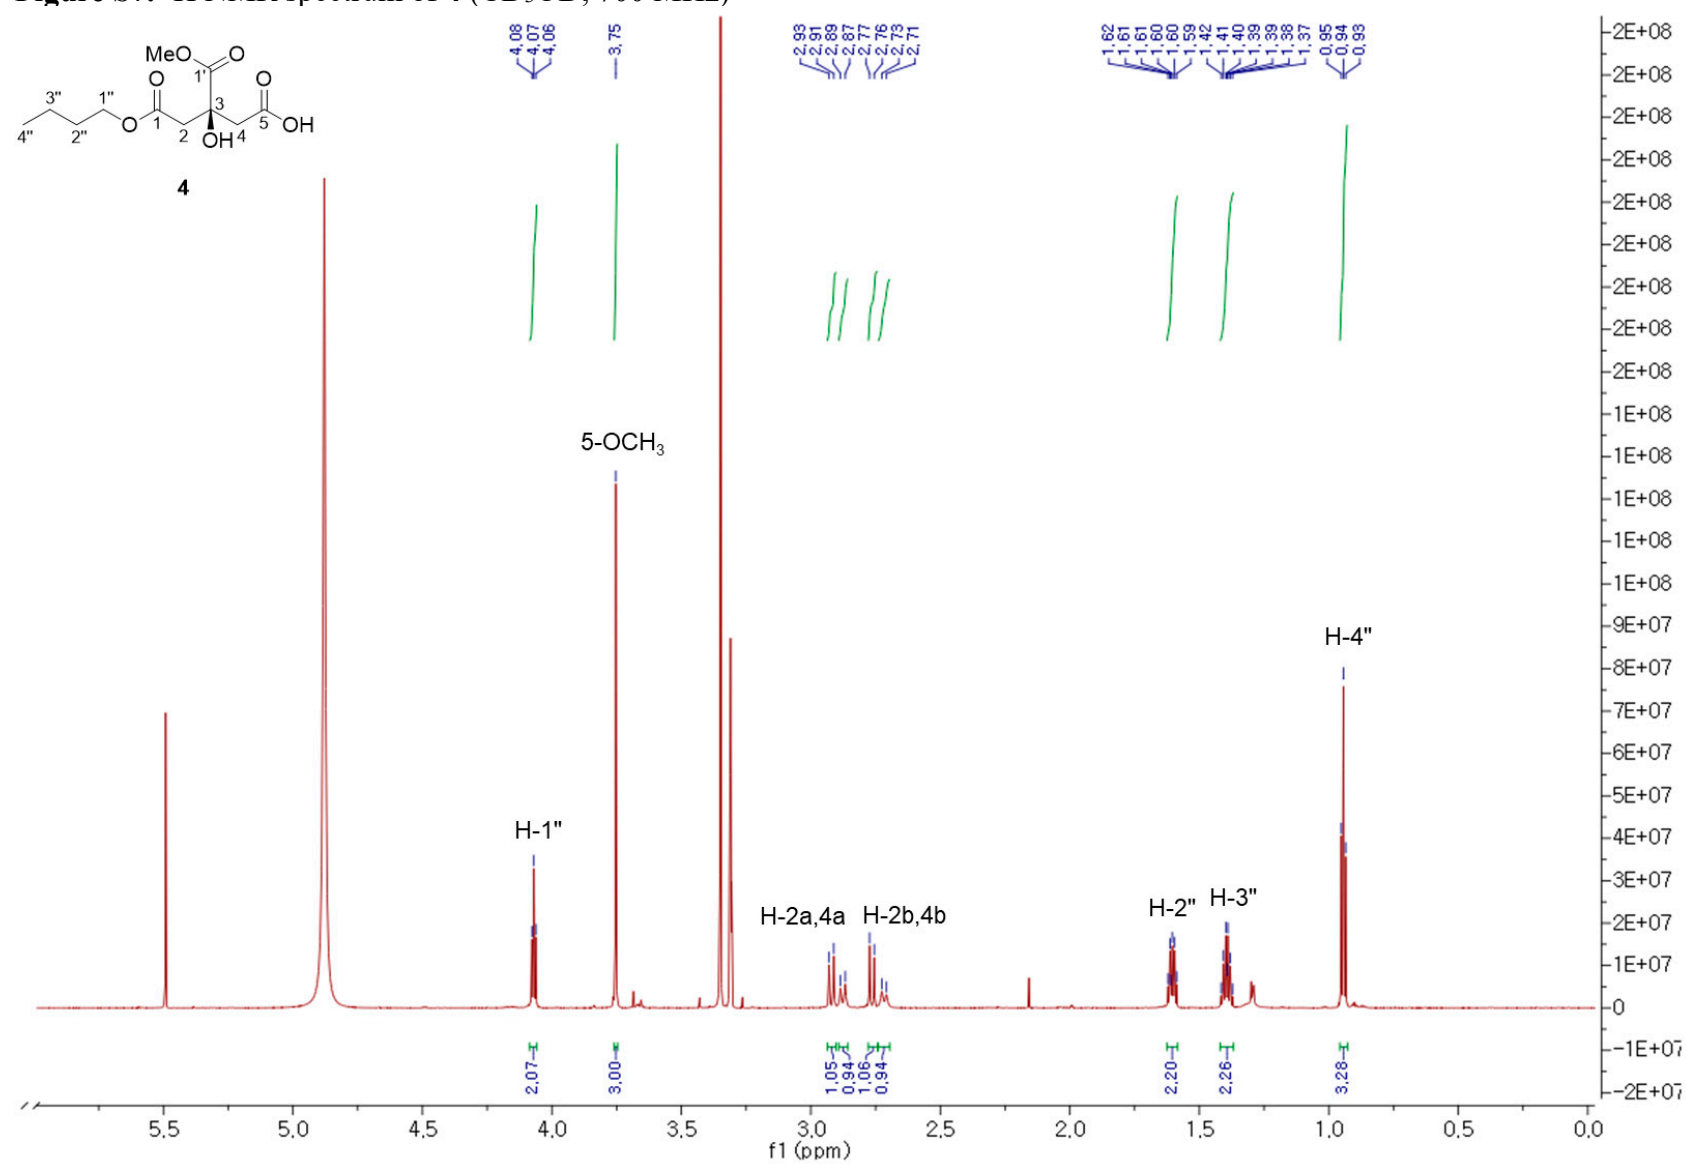

**Figure S8.**  $^1\text{H}$ - $^1\text{H}$  COSY spectrum of **4** ( $\text{CD}_3\text{OD}$ )

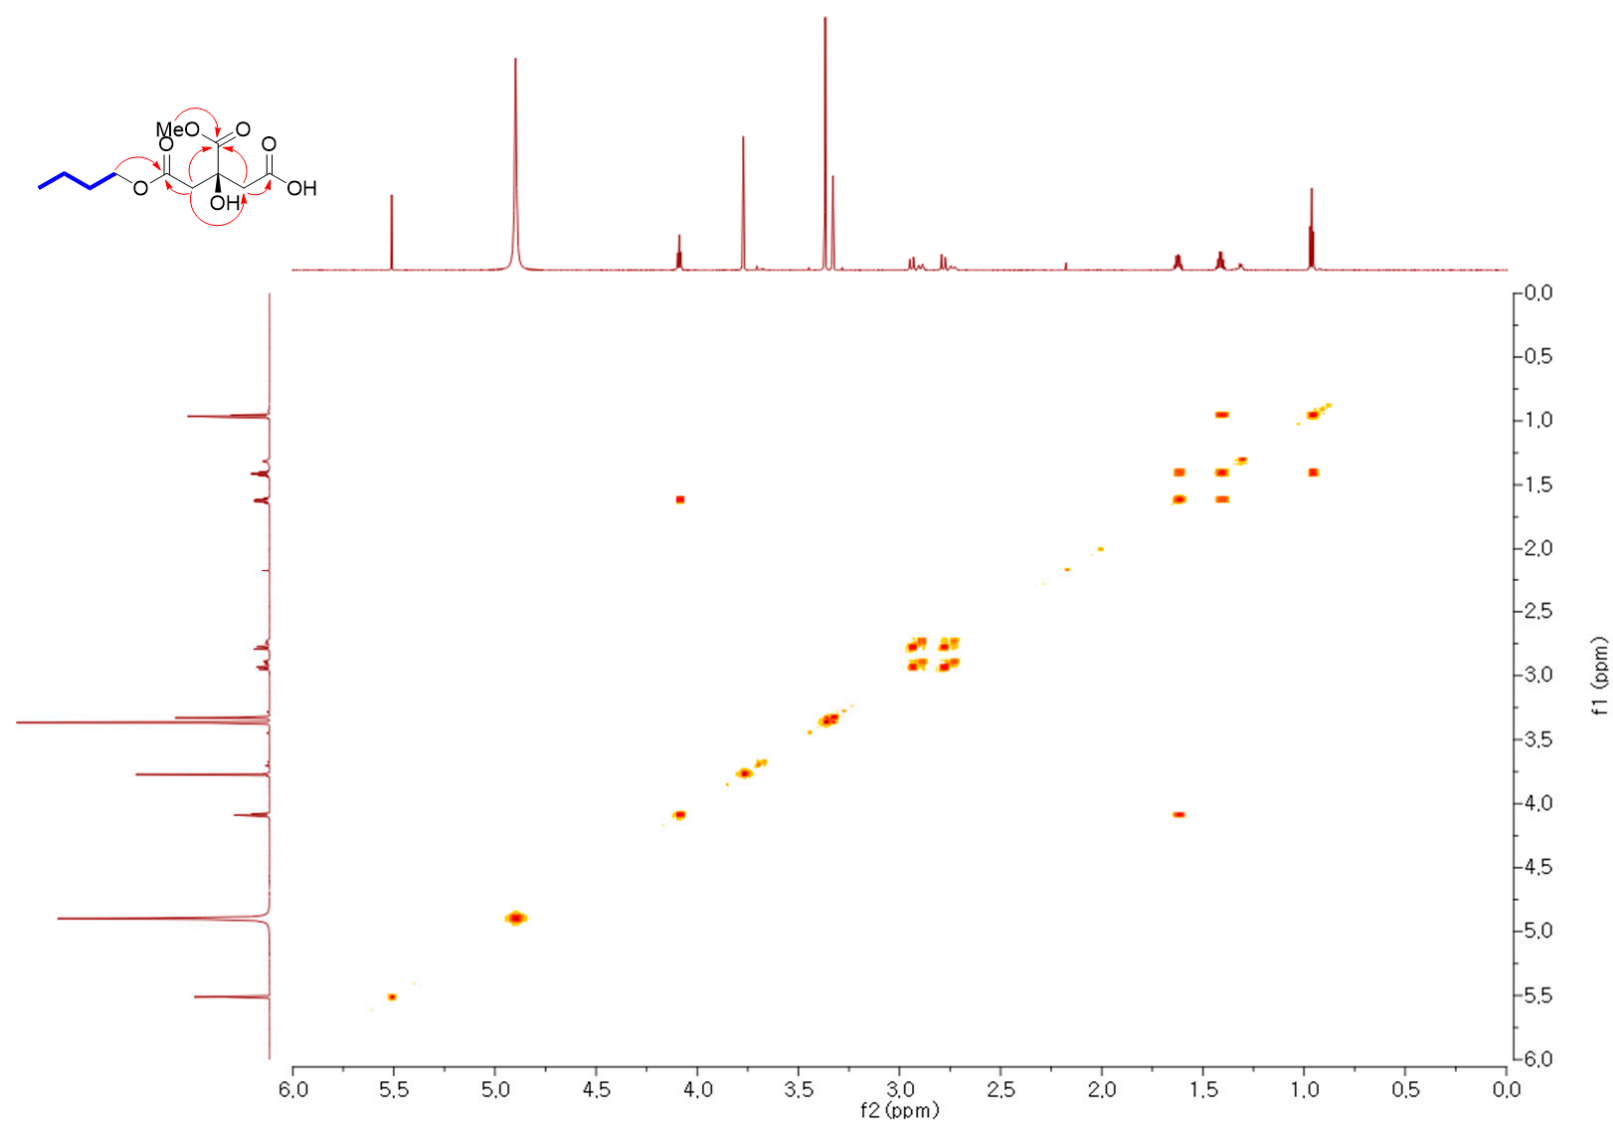

**Figure S9.** HSQC spectrum of **4** (CD<sub>3</sub>OD)

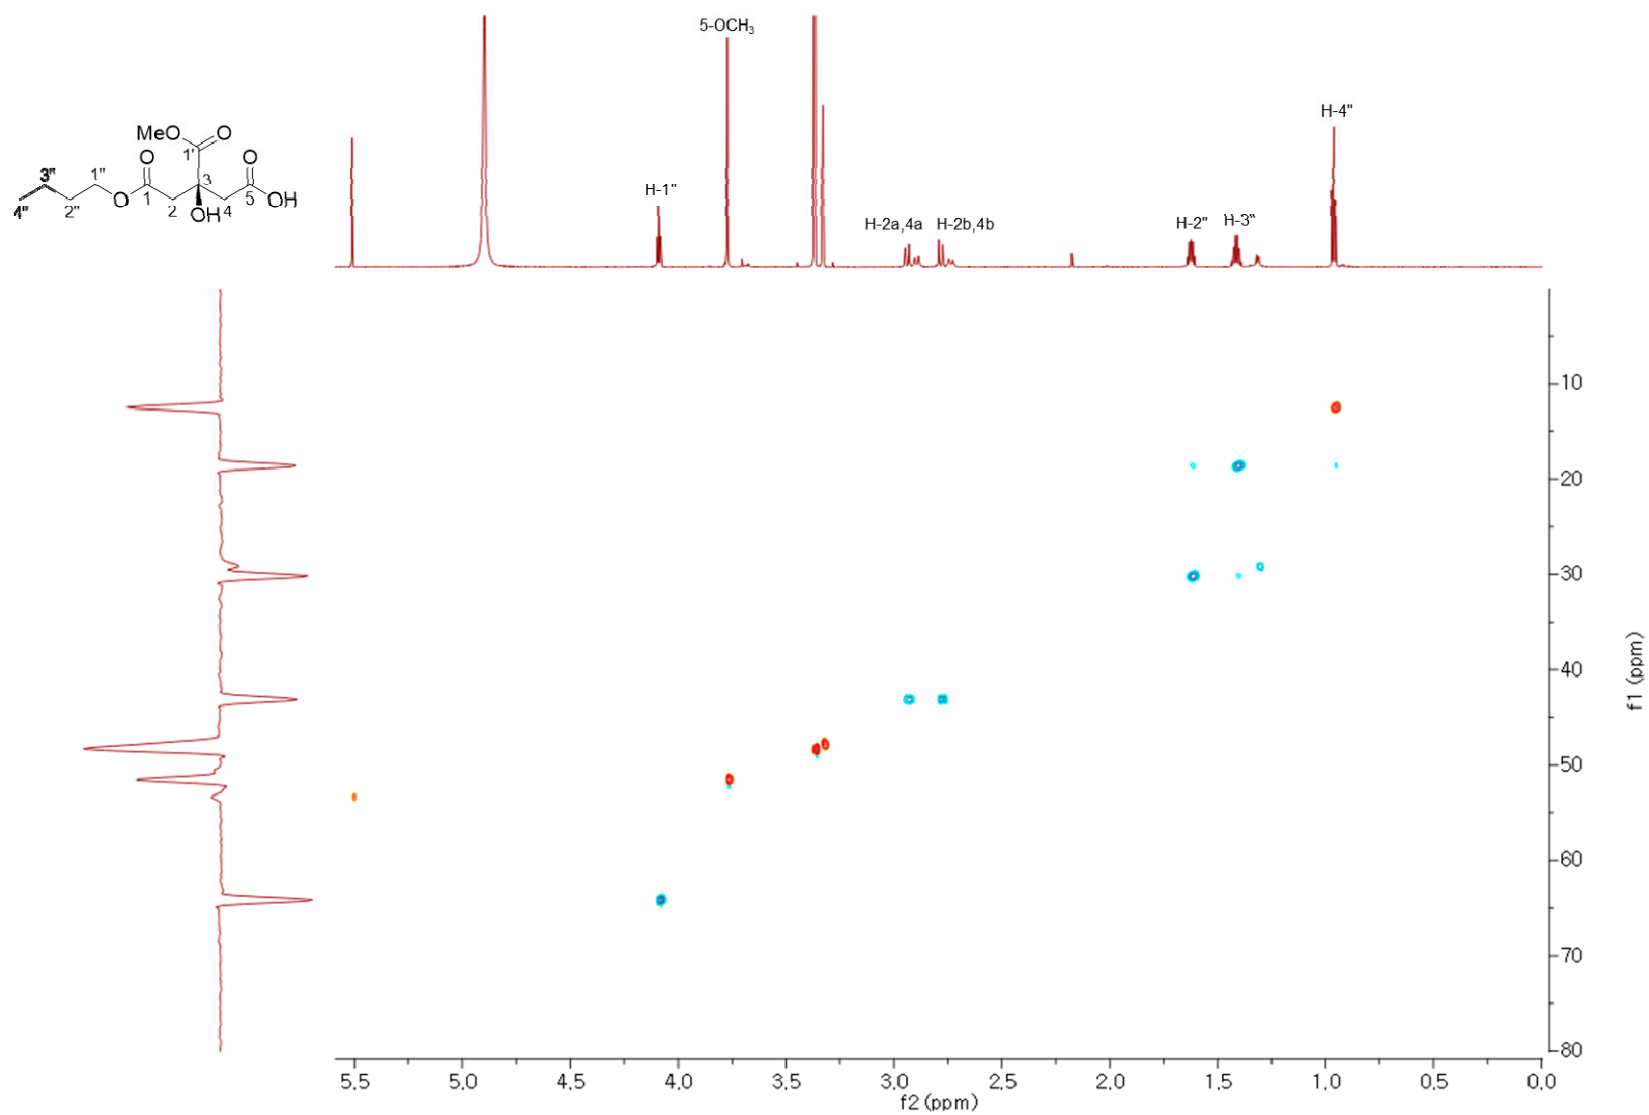

**Figure S10.** HMBC spectrum of **4** (CD<sub>3</sub>OD)

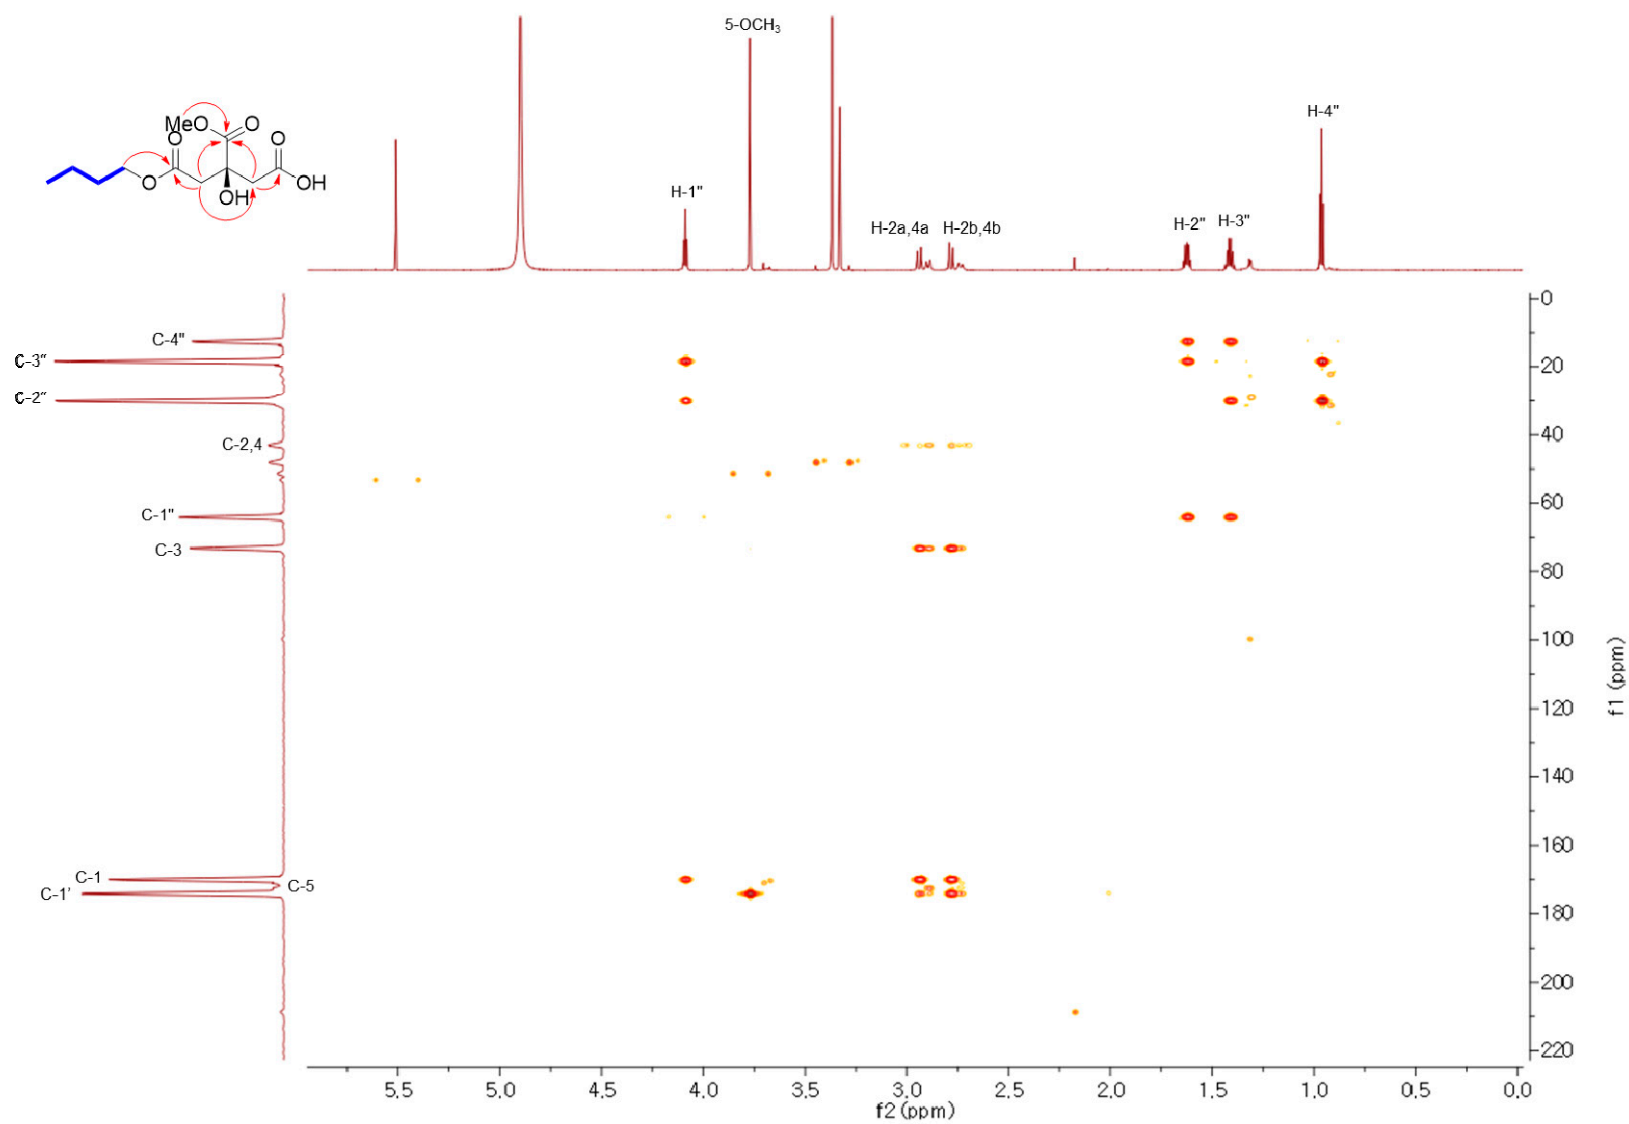

Figure S11. HR-ESIMS data of **6**

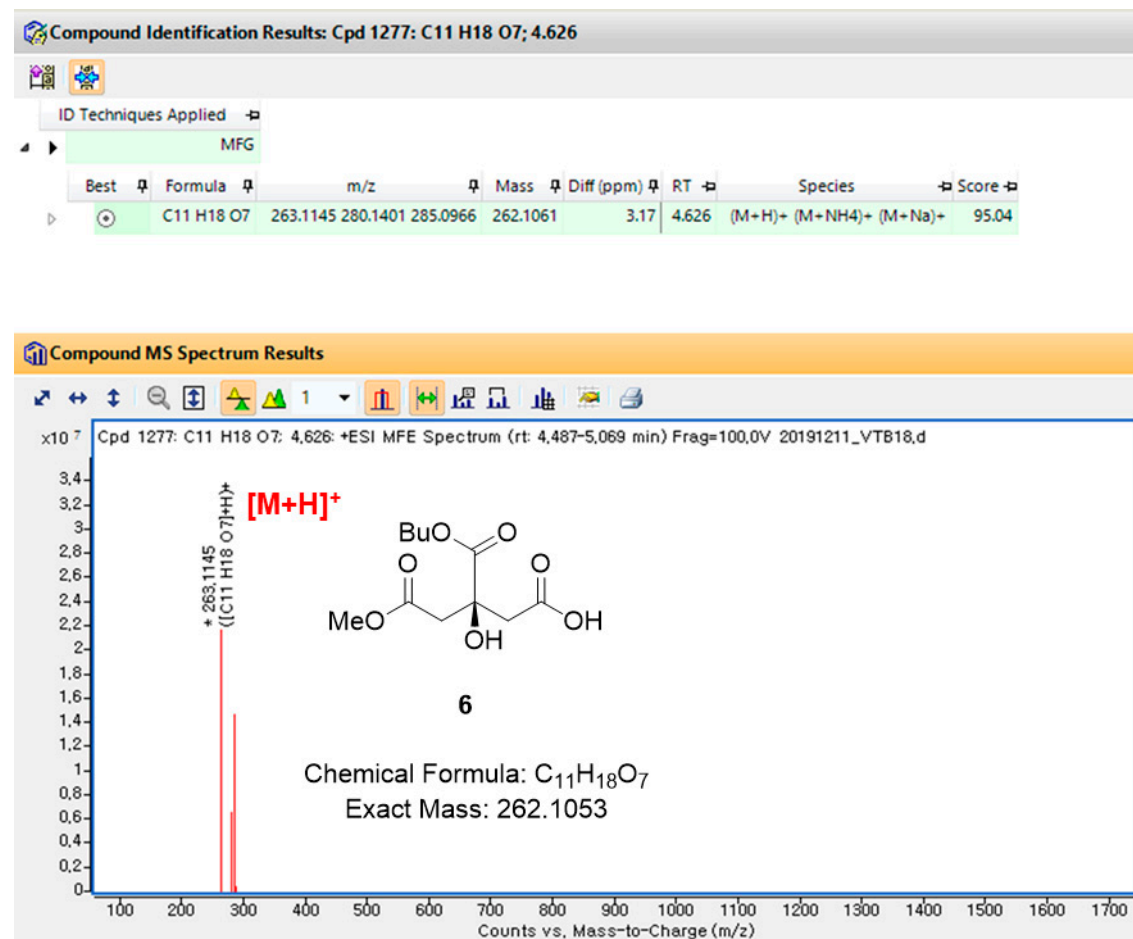

**Figure S12.**  $^1\text{H}$  NMR spectrum of **6** ( $\text{CD}_3\text{OD}$ , 700 MHz)

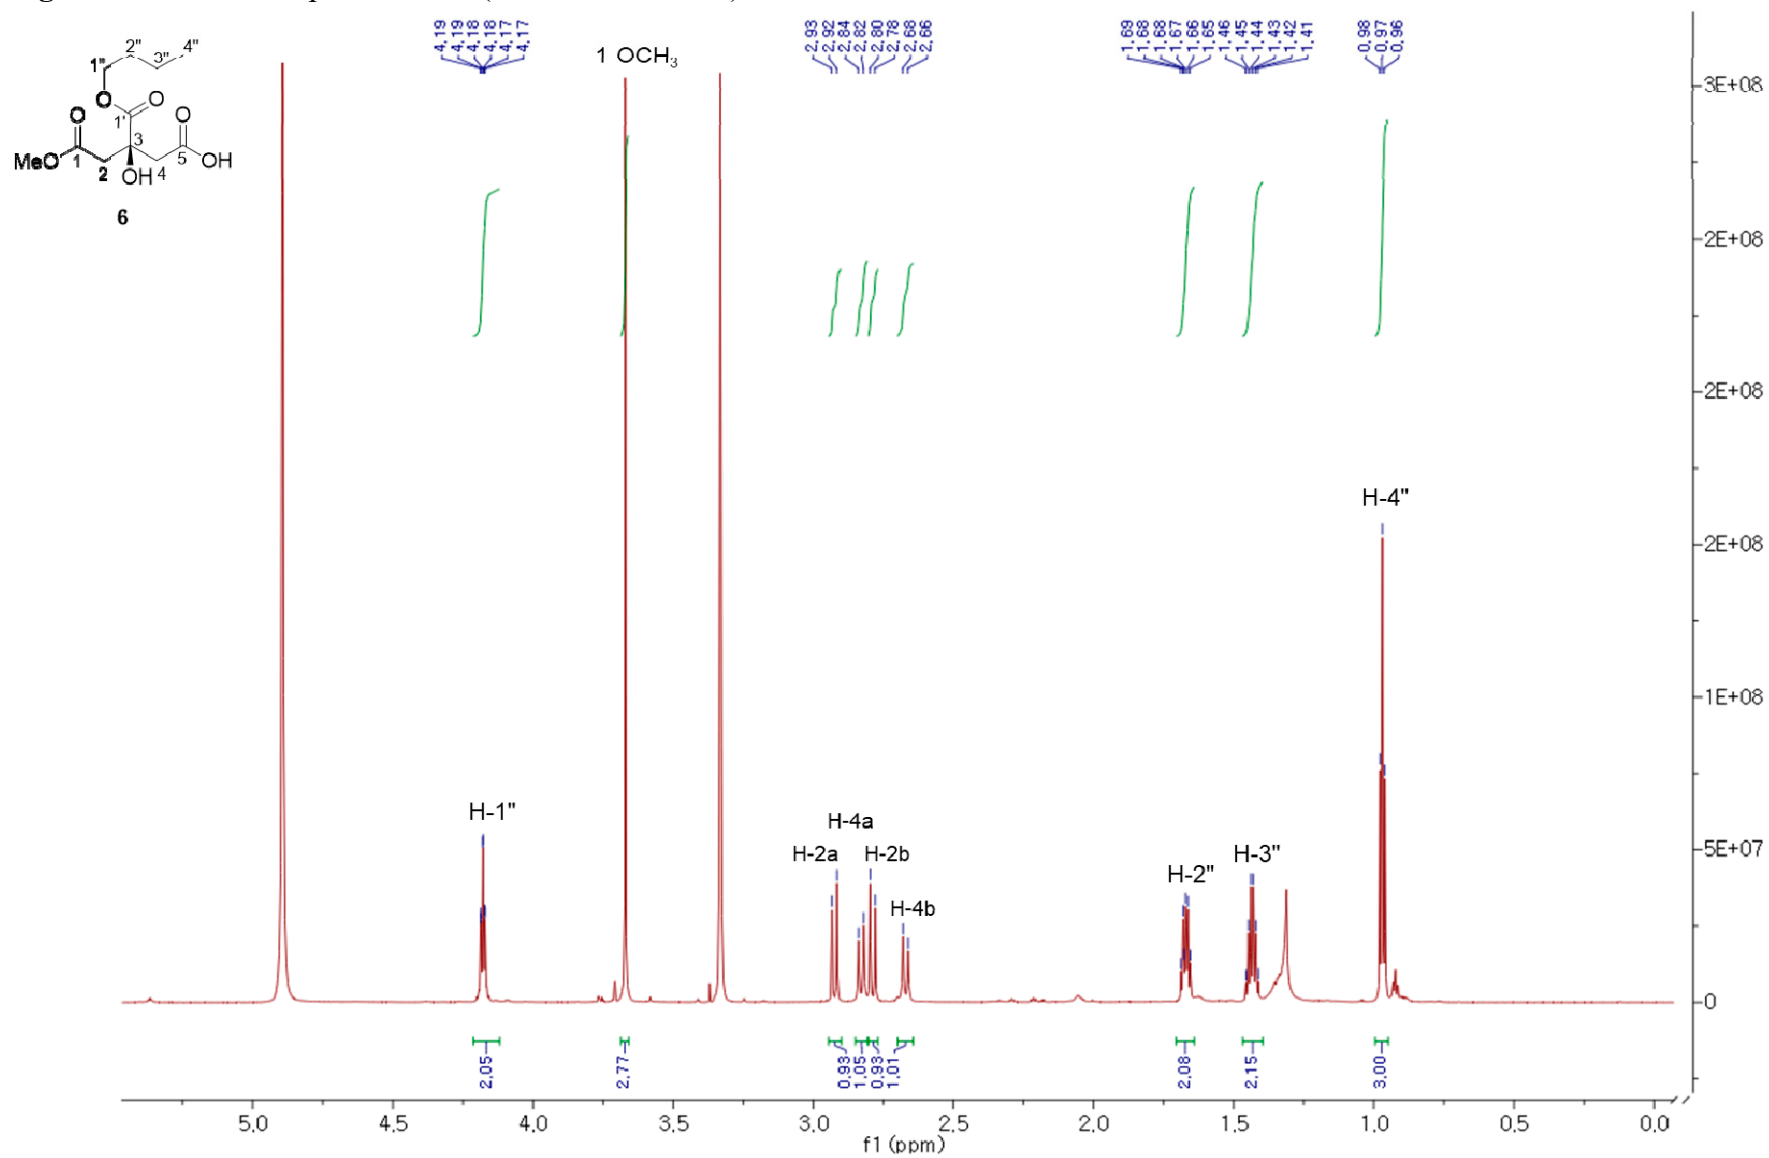

**Figure S13.**  $^1\text{H}$ - $^1\text{H}$  COSY spectrum of **6** ( $\text{CD}_3\text{OD}$ )

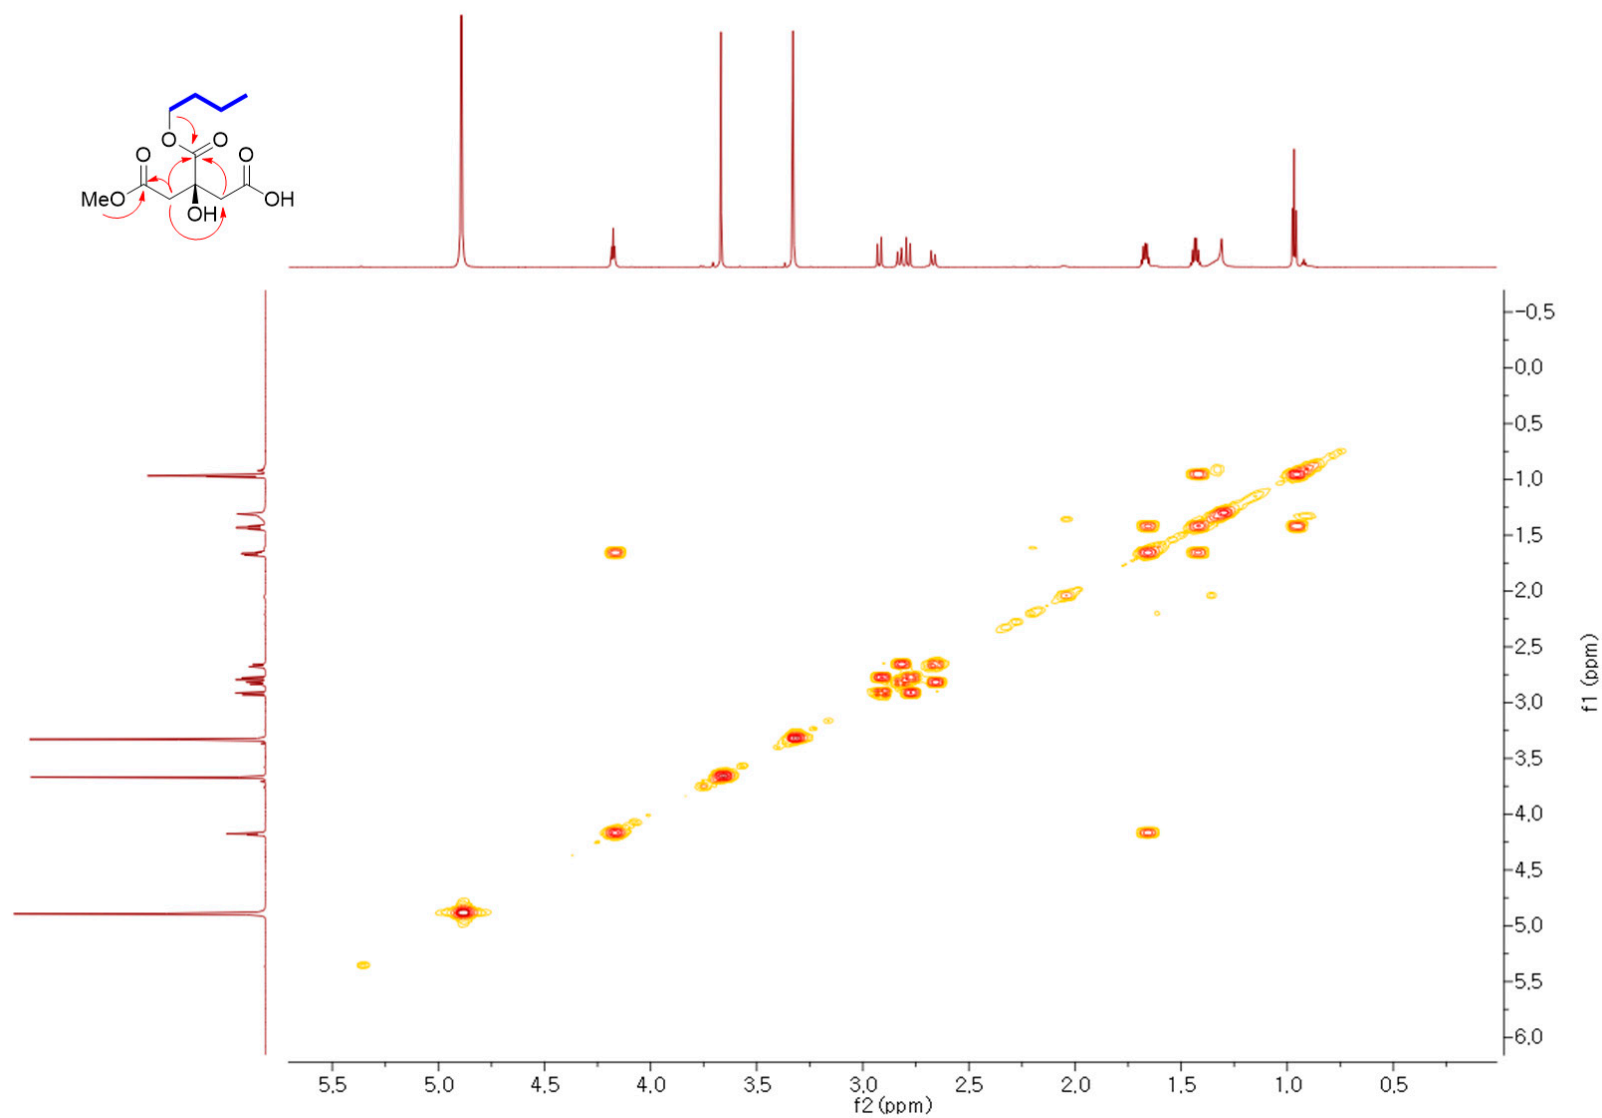

**Figure S14.** HSQC spectrum of **6** (CD<sub>3</sub>OD)

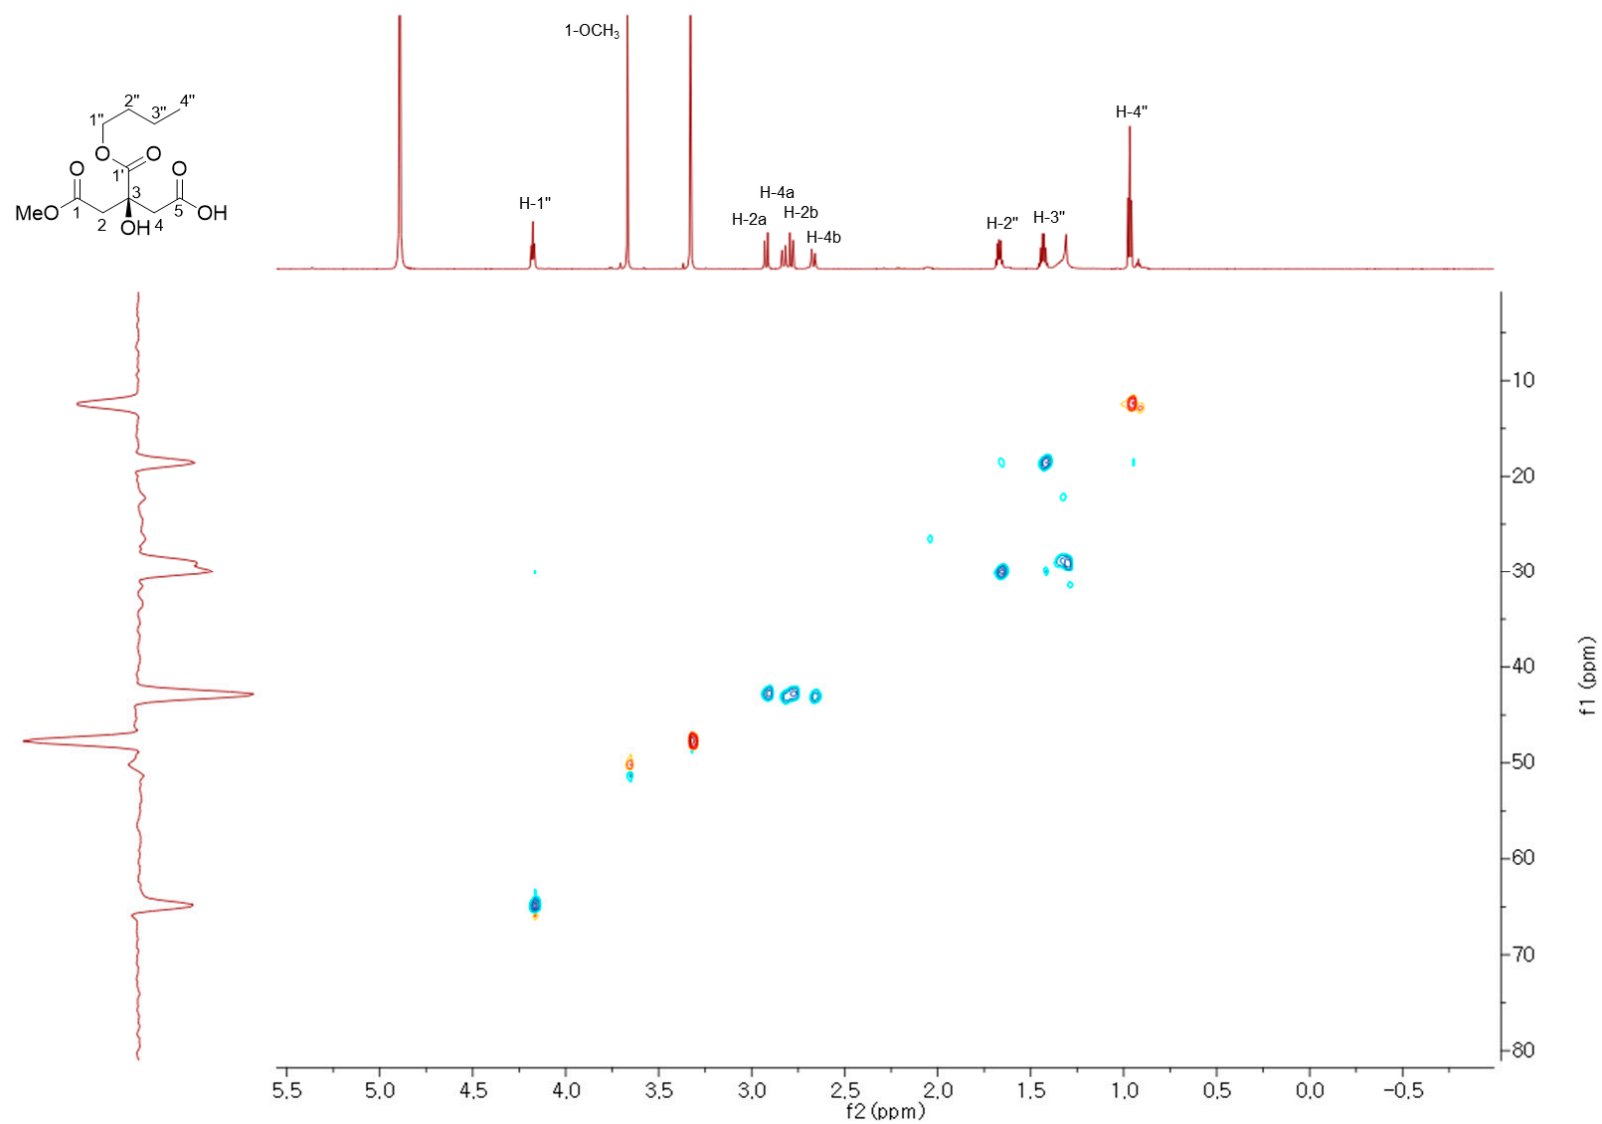



**Figure S15.** HMBC spectrum of **6** (CD<sub>3</sub>OD)

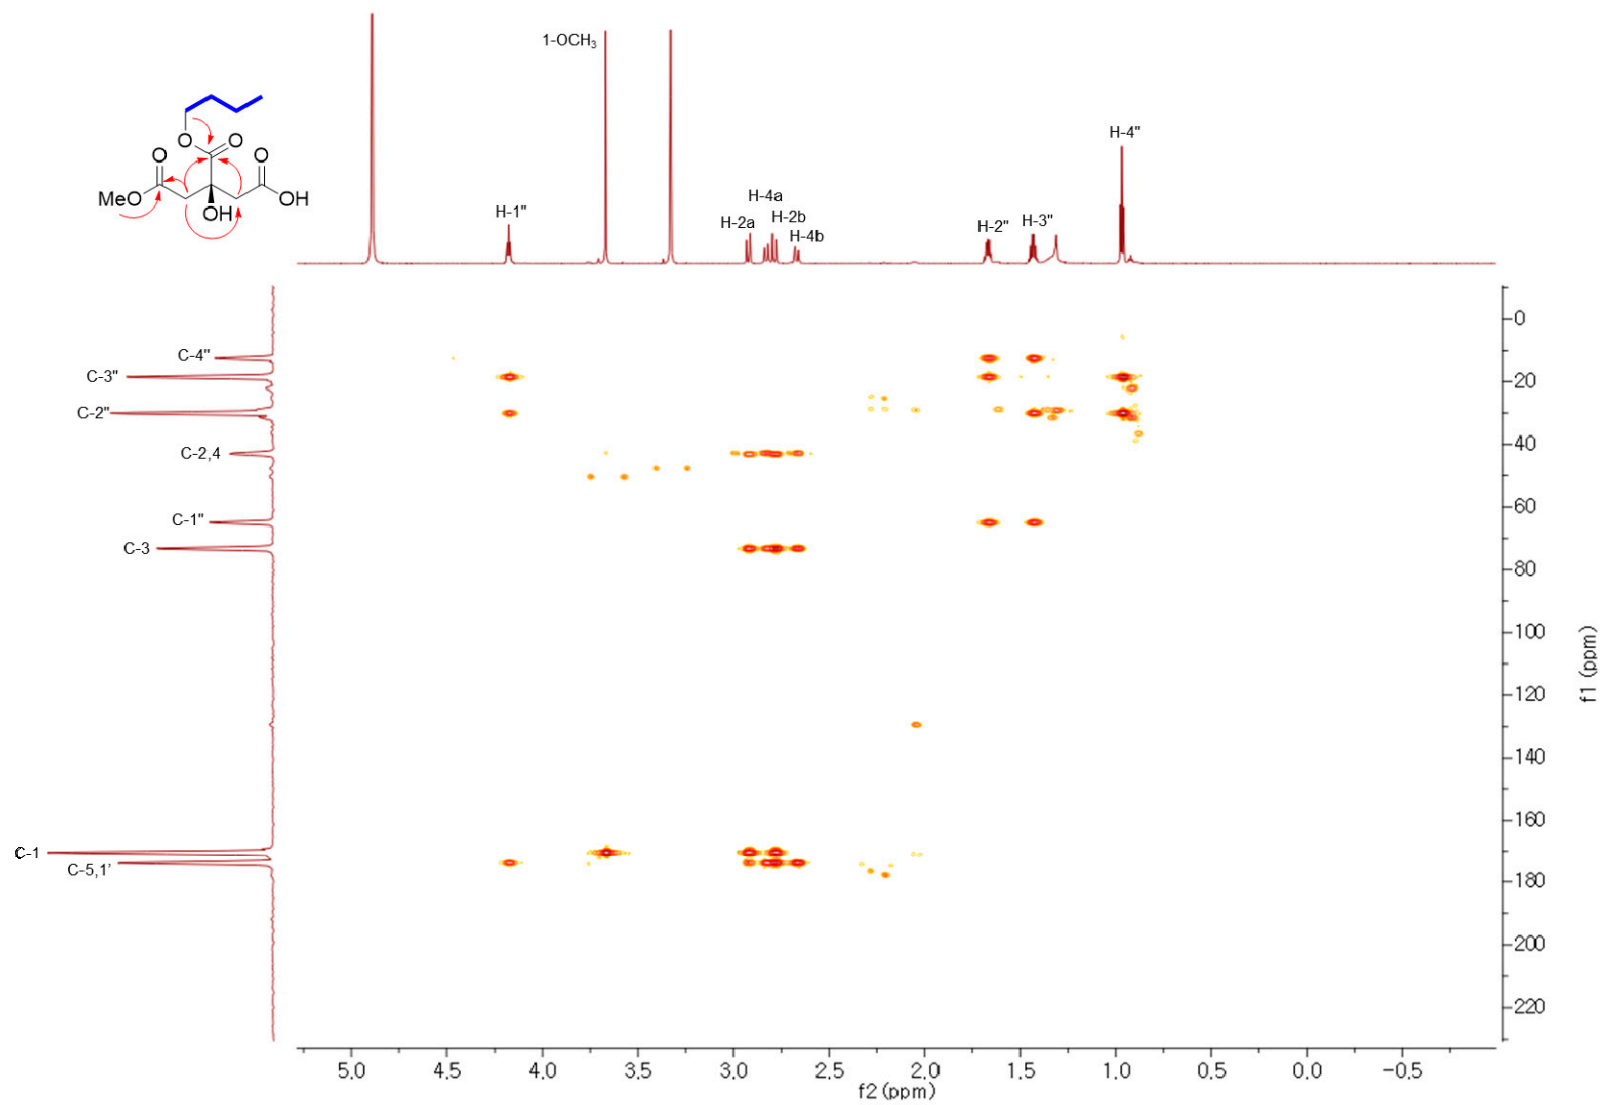

**Table S1.** Gibbs free energies and Boltzmann distribution of conformers **3S** (3S)

| Conformers    | B3LYP/6-31+G(d,p) Gibbs free energy (298.15 K) |            |                            |
|---------------|------------------------------------------------|------------|----------------------------|
|               | G (Hartree)                                    | $\Delta G$ | Boltzmann distribution (%) |
|               |                                                | (kcal/mol) |                            |
| <b>3S</b> -1  | -956.110424                                    | 0.000000   | 19.98                      |
| <b>3S</b> -2  | -956.110044                                    | 0.000380   | 13.36                      |
| <b>3S</b> -3  | -956.109983                                    | 0.000442   | 12.52                      |
| <b>3S</b> -4  | -956.109973                                    | 0.000451   | 12.39                      |
| <b>3S</b> -5  | -956.109798                                    | 0.000627   | 10.29                      |
| <b>3S</b> -6  | -956.109756                                    | 0.000669   | 9.84                       |
| <b>3S</b> -7  | -956.109704                                    | 0.000720   | 9.32                       |
| <b>3S</b> -8  | -956.109577                                    | 0.000848   | 8.14                       |
| <b>3S</b> -9  | -956.108238                                    | 0.002186   | 1.97                       |
| <b>3S</b> -10 | -956.107726                                    | 0.002698   | 1.15                       |
| <b>3S</b> -11 | -956.107630                                    | 0.002794   | 1.04                       |

**Table S2.** Gibbs free energies and Boltzmann distribution of conformers **4S** (3S)

| Conformers    | B3LYP/6-31+G(d,p) Gibbs free energy (298.15 K) |                          |                            |
|---------------|------------------------------------------------|--------------------------|----------------------------|
|               | G (Hartree)                                    | $\Delta G$<br>(kcal/mol) | Boltzmann distribution (%) |
| <b>4S</b> -1  | -956.110247                                    | 0.000000                 | 18.82                      |
| <b>4S</b> -2  | -956.109868                                    | 0.000379                 | 12.60                      |
| <b>4S</b> -3  | -956.109740                                    | 0.000507                 | 11.00                      |
| <b>4S</b> -4  | -956.109709                                    | 0.000538                 | 10.64                      |
| <b>4S</b> -5  | -956.109635                                    | 0.000612                 | 9.84                       |
| <b>4S</b> -6  | -956.109493                                    | 0.000754                 | 8.47                       |
| <b>4S</b> -7  | -956.109353                                    | 0.000893                 | 7.30                       |
| <b>4S</b> -8  | -956.109301                                    | 0.000946                 | 6.91                       |
| <b>4S</b> -9  | -956.109192                                    | 0.001055                 | 6.16                       |
| <b>4S</b> -10 | -956.109070                                    | 0.001176                 | 5.41                       |
| <b>4S</b> -11 | -956.108049                                    | 0.002198                 | 1.83                       |
| <b>4S</b> -12 | -956.107485                                    | 0.002762                 | 1.01                       |

**Table S3.** Gibbs free energies and Boltzmann distribution of conformers **6S** (3S)

| Conformers    | B3LYP/6-31+G(d,p) Gibbs free energy (298.15 K) |                          |                            |
|---------------|------------------------------------------------|--------------------------|----------------------------|
|               | G (Hartree)                                    | $\Delta G$<br>(kcal/mol) | Boltzmann distribution (%) |
| <b>6S</b> -1  | -956.109734                                    | 0.000000                 | 12.75                      |
| <b>6S</b> -2  | -956.109664                                    | 0.000070                 | 11.84                      |
| <b>6S</b> -3  | -956.109658                                    | 0.000076                 | 11.77                      |
| <b>6S</b> -4  | -956.109638                                    | 0.000096                 | 11.52                      |
| <b>6S</b> -5  | -956.109595                                    | 0.000138                 | 11.02                      |
| <b>6S</b> -6  | -956.109560                                    | 0.000173                 | 10.62                      |
| <b>6S</b> -7  | -956.109418                                    | 0.000316                 | 9.12                       |
| <b>6S</b> -8  | -956.109281                                    | 0.000452                 | 7.90                       |
| <b>6S</b> -9  | -956.108367                                    | 0.001367                 | 3.00                       |
| <b>6S</b> -10 | -956.108325                                    | 0.001409                 | 2.87                       |
| <b>6S</b> -11 | -956.108098                                    | 0.001636                 | 2.25                       |
| <b>6S</b> -12 | -956.107791                                    | 0.001943                 | 1.63                       |
| <b>6S</b> -13 | -956.107610                                    | 0.002123                 | 1.35                       |
| <b>6S</b> -14 | -956.107603                                    | 0.002130                 | 1.34                       |
| <b>6S</b> -15 | -956.107359                                    | 0.002374                 | 1.03                       |
| <b>6S</b> -16 | 956.109114                                     | 1912.218848              | 0.00                       |

# Coordinates of the conformers

3S\_1

| Center<br>Number | Atomic Coordinates |             |             | Atom | Atomic<br>Number | Atomic<br>Type |
|------------------|--------------------|-------------|-------------|------|------------------|----------------|
|                  | X                  | Y           | Z           |      |                  |                |
| 1                | 12.17245817        | -5.00920256 | 8.63639895  | c    | 6                | 0              |
| 2                | 11.55405016        | -2.78397399 | 6.89025312  | c    | 6                | 0              |
| 3                | 9.20144385         | -3.25827013 | 5.26006941  | c    | 6                | 0              |
| 4                | 8.4799967          | -1.04471556 | 3.5742582   | c    | 6                | 0              |
| 5                | 10.55500591        | -0.5987634  | 1.842868    | o    | 8                | 0              |
| 6                | 10.32648802        | 1.42257165  | 0.31224401  | c    | 6                | 0              |
| 7                | 12.73500164        | 1.86698894  | -1.1744269  | c    | 6                | 0              |
| 8                | 14.46026427        | 3.92081117  | 0.01587841  | c    | 6                | 0              |
| 9                | 15.05641171        | 3.12892111  | 2.76381002  | c    | 6                | 0              |
| 10               | 16.99638371        | 1.49330411  | 2.92053274  | o    | 8                | 0              |
| 11               | 13.86553601        | 3.84098546  | 4.59103758  | o    | 8                | 0              |
| 12               | 16.6432132         | 3.95617343  | -1.51131956 | o    | 8                | 0              |
| 13               | 13.14904681        | 6.52441201  | 0.05904854  | c    | 6                | 0              |
| 14               | 14.87013102        | 8.54292775  | 1.12570593  | c    | 6                | 0              |
| 15               | 13.59192304        | 10.6041125  | 1.84088166  | o    | 8                | 0              |
| 16               | 15.0956883         | 12.6503633  | 2.82345741  | c    | 6                | 0              |
| 17               | 17.16740769        | 8.36124398  | 1.28386939  | o    | 8                | 0              |
| 18               | 8.45308349         | 2.74070843  | 0.19832083  | o    | 8                | 0              |
| 19               | 12.52519746        | -6.73907761 | 7.55200693  | h    | 1                | 0              |
| 20               | 13.85776961        | -4.62910415 | 9.7759692   | h    | 1                | 0              |
| 21               | 10.61035586        | -5.39850189 | 9.94041906  | h    | 1                | 0              |
| 22               | 11.2700899         | -1.06296206 | 8.0147682   | h    | 1                | 0              |
| 23               | 13.16339774        | -2.3988311  | 5.64374468  | h    | 1                | 0              |
| 24               | 7.57117064         | -3.66305975 | 6.48032824  | h    | 1                | 0              |
| 25               | 9.4875817          | -4.94329233 | 4.08367207  | h    | 1                | 0              |
| 26               | 8.15947329         | 0.68588985  | 4.66261357  | h    | 1                | 0              |
| 27               | 6.77013401         | -1.43146394 | 2.47553063  | h    | 1                | 0              |
| 28               | 13.8411582         | 0.13064846  | -1.30714273 | h    | 1                | 0              |
| 29               | 12.24041486        | 2.50203246  | -3.07653706 | h    | 1                | 0              |

|    |             |             |             |   |   |   |
|----|-------------|-------------|-------------|---|---|---|
| 30 | 17.163651   | 1.08204039  | 4.70409409  | h | 1 | 0 |
| 31 | 17.70684527 | 5.29353426  | -0.82722132 | h | 1 | 0 |
| 32 | 12.68410323 | 7.04843819  | -1.8911689  | h | 1 | 0 |
| 33 | 11.38369533 | 6.47956022  | 1.12019085  | h | 1 | 0 |
| 34 | 13.75714986 | 14.14819586 | 3.27598248  | h | 1 | 0 |
| 35 | 16.11282302 | 12.04585633 | 4.51554863  | h | 1 | 0 |
| 36 | 16.4589544  | 13.29067446 | 1.41047696  | h | 1 | 0 |

### 3S\_2

| Center<br>Number | Atomic Coordinates |             |             | Atom | Atomic<br>Number | Atomic<br>Type |
|------------------|--------------------|-------------|-------------|------|------------------|----------------|
|                  | X                  | Y           | Z           |      |                  |                |
| 1                | 9.45803719         | -6.65767364 | 9.11413913  | c    | 6                | 0              |
| 2                | 8.50618689         | -4.36975232 | 7.61718145  | c    | 6                | 0              |
| 3                | 10.33981209        | -3.55477833 | 5.52239309  | c    | 6                | 0              |
| 4                | 9.37017778         | -1.28301801 | 4.05596875  | c    | 6                | 0              |
| 5                | 11.23241664        | -0.66591564 | 2.14768528  | o    | 8                | 0              |
| 6                | 10.71167229        | 1.36328929  | 0.70314753  | c    | 6                | 0              |
| 7                | 12.8806535         | 1.96631163  | -1.0699894  | c    | 6                | 0              |
| 8                | 14.58335848        | 4.16480522  | -0.13442716 | c    | 6                | 0              |
| 9                | 15.67070667        | 3.41995848  | 2.47053404  | c    | 6                | 0              |
| 10               | 17.85240099        | 2.12785622  | 2.29922944  | o    | 8                | 0              |
| 11               | 14.63905988        | 3.88544039  | 4.46618152  | o    | 8                | 0              |
| 12               | 16.48079113        | 4.39583302  | -1.9903246  | o    | 8                | 0              |
| 13               | 13.0770918         | 6.64357341  | 0.15843494  | c    | 6                | 0              |
| 14               | 14.770132          | 8.80542024  | 0.95504855  | c    | 6                | 0              |
| 15               | 13.44564785        | 10.78639028 | 1.80440425  | o    | 8                | 0              |
| 16               | 14.9088424         | 12.95705362 | 2.55389753  | c    | 6                | 0              |
| 17               | 17.0753447         | 8.79257587  | 0.81561891  | o    | 8                | 0              |
| 18               | 8.76530196         | 2.57073511  | 0.84088065  | o    | 8                | 0              |
| 19               | 11.27402504        | -6.25338548 | 10.02530056 | h    | 1                | 0              |
| 20               | 8.11752137         | -7.19717868 | 10.59496671 | h    | 1                | 0              |
| 21               | 9.72972886         | -8.29939188 | 7.88070718  | h    | 1                | 0              |

|    |             |             |             |   |   |   |
|----|-------------|-------------|-------------|---|---|---|
| 22 | 6.65662879  | -4.80989961 | 6.78292558  | h | 1 | 0 |
| 23 | 8.18899034  | -2.77912285 | 8.91260566  | h | 1 | 0 |
| 24 | 10.6559383  | -5.12743213 | 4.20726953  | h | 1 | 0 |
| 25 | 12.18556134 | -3.08517325 | 6.34353711  | h | 1 | 0 |
| 26 | 9.1057993   | 0.36916356  | 5.27329285  | h | 1 | 0 |
| 27 | 7.56313977  | -1.67316117 | 3.12380669  | h | 1 | 0 |
| 28 | 14.08675778 | 0.31413044  | -1.33949643 | h | 1 | 0 |
| 29 | 12.10197599 | 2.53476167  | -2.89685243 | h | 1 | 0 |
| 30 | 18.32470298 | 1.70875812  | 4.02542307  | h | 1 | 0 |
| 31 | 17.55279087 | 5.78440924  | -1.43643373 | h | 1 | 0 |
| 32 | 12.24298695 | 7.12499355  | -1.67619205 | h | 1 | 0 |
| 33 | 11.52497758 | 6.44533187  | 1.49925703  | h | 1 | 0 |
| 34 | 16.17888015 | 12.46636594 | 4.10600796  | h | 1 | 0 |
| 35 | 16.02595536 | 13.66083719 | 0.96600875  | h | 1 | 0 |
| 36 | 13.53333174 | 14.36555265 | 3.1572081   | h | 1 | 0 |

### 3S\_3

| Center<br>Number | Atomic Coordinates |             |             | Atom | Atomic<br>Number | Atomic<br>Type |
|------------------|--------------------|-------------|-------------|------|------------------|----------------|
|                  | X                  | Y           | Z           |      |                  |                |
| 1                | 12.54228948        | -5.19455052 | 8.46547261  | c    | 6                | 0              |
| 2                | 11.77215393        | -2.91077161 | 6.86183262  | c    | 6                | 0              |
| 3                | 9.39882301         | -3.40467123 | 5.26723989  | c    | 6                | 0              |
| 4                | 8.56762184         | -1.16039023 | 3.67479039  | c    | 6                | 0              |
| 5                | 10.5542247         | -0.63752177 | 1.8663696   | o    | 8                | 0              |
| 6                | 10.28639979        | 1.47999125  | 0.47684781  | c    | 6                | 0              |
| 7                | 12.58782849        | 1.93508848  | -1.16691952 | c    | 6                | 0              |
| 8                | 14.46604568        | 3.90042607  | -0.06038835 | c    | 6                | 0              |
| 9                | 15.41641042        | 2.90114527  | 2.51743222  | c    | 6                | 0              |
| 10               | 13.88942377        | 3.62387653  | 4.45120844  | o    | 8                | 0              |
| 11               | 17.24818391        | 1.57712591  | 2.81453078  | o    | 8                | 0              |
| 12               | 16.48407076        | 3.95290481  | -1.79376239 | o    | 8                | 0              |
| 13               | 13.23422275        | 6.53394031  | 0.18545725  | c    | 6                | 0              |

|    |             |             |             |   |   |   |
|----|-------------|-------------|-------------|---|---|---|
| 14 | 15.08142789 | 8.46942671  | 1.19260434  | c | 6 | 0 |
| 15 | 13.92285883 | 10.60995834 | 1.89525757  | o | 8 | 0 |
| 16 | 15.55222431 | 12.59094929 | 2.80805742  | c | 6 | 0 |
| 17 | 17.36357535 | 8.16223256  | 1.32899273  | o | 8 | 0 |
| 18 | 8.45257825  | 2.85461392  | 0.57684944  | o | 8 | 0 |
| 19 | 12.95203928 | -6.83775604 | 7.27302911  | h | 1 | 0 |
| 20 | 14.23813308 | -4.79436744 | 9.58164734  | h | 1 | 0 |
| 21 | 11.03514595 | -5.73484196 | 9.78025248  | h | 1 | 0 |
| 22 | 11.42368923 | -1.2782436  | 8.10023467  | h | 1 | 0 |
| 23 | 13.33352645 | -2.38319153 | 5.60638954  | h | 1 | 0 |
| 24 | 7.81257588  | -3.90995838 | 6.50744155  | h | 1 | 0 |
| 25 | 9.71627986  | -5.03410332 | 4.02352593  | h | 1 | 0 |
| 26 | 8.25876402  | 0.53591135  | 4.81966655  | h | 1 | 0 |
| 27 | 6.81734295  | -1.55075542 | 2.64182037  | h | 1 | 0 |
| 28 | 13.63775489 | 0.18222164  | -1.45238499 | h | 1 | 0 |
| 29 | 11.95926784 | 2.652331    | -2.99932042 | h | 1 | 0 |
| 30 | 14.5733359  | 2.83270306  | 5.96264741  | h | 1 | 0 |
| 31 | 17.74370974 | 5.07776899  | -1.07000257 | h | 1 | 0 |
| 32 | 12.64708515 | 7.14253729  | -1.70654079 | h | 1 | 0 |
| 33 | 11.53774555 | 6.50304486  | 1.35714859  | h | 1 | 0 |
| 34 | 14.30369631 | 14.16287265 | 3.26749953  | h | 1 | 0 |
| 35 | 16.58185304 | 11.96346001 | 4.48446458  | h | 1 | 0 |
| 36 | 16.91086007 | 13.13898238 | 1.35267522  | h | 1 | 0 |

### 3S\_4

| Center<br>Number | Atomic Coordinates |             |            | Atom | Atomic<br>Number | Atomic<br>Type |
|------------------|--------------------|-------------|------------|------|------------------|----------------|
|                  | X                  | Y           | Z          |      |                  |                |
| 1                | 5.75474256         | -6.35820023 | 8.18147045 | c    | 6                | 0              |
| 2                | 8.17902305         | -5.78626127 | 6.70514557 | c    | 6                | 0              |
| 3                | 8.27255455         | -3.06198792 | 5.71155386 | c    | 6                | 0              |
| 4                | 10.68245298        | -2.53172554 | 4.24098801 | c    | 6                | 0              |
| 5                | 10.58291833        | 0.07255449  | 3.38799793 | o    | 8                | 0              |



|    |             |             |             |   |   |   |
|----|-------------|-------------|-------------|---|---|---|
| 6  | 12.49482346 | 0.85313839  | 1.93284968  | c | 6 | 0 |
| 7  | 12.16355672 | 3.56658433  | 1.08739827  | c | 6 | 0 |
| 8  | 14.61584154 | 4.62280556  | -0.08116575 | c | 6 | 0 |
| 9  | 16.67856409 | 4.69341772  | 1.98327238  | c | 6 | 0 |
| 10 | 19.02093776 | 4.36013453  | 1.05606483  | o | 8 | 0 |
| 11 | 16.24875234 | 5.08251802  | 4.20295381  | o | 8 | 0 |
| 12 | 15.36379131 | 3.2076508   | -2.21044565 | o | 8 | 0 |
| 13 | 14.24981899 | 7.3532058   | -1.08993141 | c | 6 | 0 |
| 14 | 13.49544174 | 9.23582239  | 0.93271046  | c | 6 | 0 |
| 15 | 15.48229938 | 10.65397934 | 1.66427365  | o | 8 | 0 |
| 16 | 14.98618948 | 12.37626018 | 3.70994128  | c | 6 | 0 |
| 17 | 11.38933068 | 9.44115376  | 1.81642866  | o | 8 | 0 |
| 18 | 14.27282986 | -0.49614797 | 1.33517175  | o | 8 | 0 |
| 19 | 4.07676596  | -6.08940632 | 6.99745318  | h | 1 | 0 |
| 20 | 5.73621594  | -8.31054282 | 8.86607798  | h | 1 | 0 |
| 21 | 5.56754407  | -5.1117435  | 9.82459382  | h | 1 | 0 |
| 22 | 9.82691174  | -6.13538665 | 7.91841698  | h | 1 | 0 |
| 23 | 8.34640449  | -7.10739543 | 5.11247321  | h | 1 | 0 |
| 24 | 8.13572475  | -1.72627387 | 7.29163073  | h | 1 | 0 |
| 25 | 6.64011211  | -2.70035512 | 4.48466606  | h | 1 | 0 |
| 26 | 10.8736913  | -3.76519792 | 2.59065777  | h | 1 | 0 |
| 27 | 12.37429379 | -2.77854578 | 5.407396    | h | 1 | 0 |
| 28 | 10.67264341 | 3.61489697  | -0.35067124 | h | 1 | 0 |
| 29 | 11.51452164 | 4.71317408  | 2.67297135  | h | 1 | 0 |
| 30 | 20.1547693  | 4.4976895   | 2.49624768  | h | 1 | 0 |
| 31 | 15.60431827 | 1.48819822  | -1.60237458 | h | 1 | 0 |
| 32 | 16.01192875 | 7.92514838  | -1.99820304 | h | 1 | 0 |
| 33 | 12.7550097  | 7.28092325  | -2.51482734 | h | 1 | 0 |
| 34 | 14.44051853 | 11.32920742 | 5.40440554  | h | 1 | 0 |
| 35 | 16.75155483 | 13.39103634 | 4.02145832  | h | 1 | 0 |
| 36 | 13.47068823 | 13.6852287  | 3.20627722  | h | 1 | 0 |

| Center<br>Number | Atomic Coordinates |             |             | Atom | Atomic<br>Number | Atomic<br>Type |
|------------------|--------------------|-------------|-------------|------|------------------|----------------|
|                  | X                  | Y           | Z           |      |                  |                |
| 1                | 9.29147882         | -2.33063416 | 10.34215878 | c    | 6                | 0              |
| 2                | 8.64882459         | -3.0522986  | 7.61151626  | c    | 6                | 0              |
| 3                | 10.37361729        | -1.75639042 | 5.67238453  | c    | 6                | 0              |
| 4                | 9.72200861         | -2.51976028 | 2.96997775  | c    | 6                | 0              |
| 5                | 11.43911109        | -1.36582889 | 1.17111697  | o    | 8                | 0              |
| 6                | 10.79604295        | 0.9372075   | 0.29052078  | c    | 6                | 0              |
| 7                | 12.81550633        | 1.97835768  | -1.45758653 | c    | 6                | 0              |
| 8                | 14.4821368         | 4.0622786   | -0.24105683 | c    | 6                | 0              |
| 9                | 15.783546          | 2.92171572  | 2.11031183  | c    | 6                | 0              |
| 10               | 17.95037089        | 1.71806631  | 1.55302864  | o    | 8                | 0              |
| 11               | 14.91835572        | 3.03130519  | 4.23330676  | o    | 8                | 0              |
| 12               | 16.23679909        | 4.72198642  | -2.13525445 | o    | 8                | 0              |
| 13               | 12.90236244        | 6.36678428  | 0.58933658  | c    | 6                | 0              |
| 14               | 14.5594223         | 8.42330642  | 1.68407868  | c    | 6                | 0              |
| 15               | 13.22619298        | 10.11400285 | 3.01120782  | o    | 8                | 0              |
| 16               | 14.65173172        | 12.17316439 | 4.07975878  | c    | 6                | 0              |
| 17               | 16.84355887        | 8.57446324  | 1.37684224  | o    | 8                | 0              |
| 18               | 8.8585992          | 2.04014757  | 0.83510709  | o    | 8                | 0              |
| 19               | 9.11922001         | -0.28775331 | 10.6339843  | h    | 1                | 0              |
| 20               | 8.02859541         | -3.27028697 | 11.68540148 | h    | 1                | 0              |
| 21               | 11.23396974        | -2.86717187 | 10.81968889 | h    | 1                | 0              |
| 22               | 8.78236646         | -5.11370442 | 7.39260213  | h    | 1                | 0              |
| 23               | 6.6721552          | -2.55737611 | 7.21385056  | h    | 1                | 0              |
| 24               | 12.35611592        | -2.23266843 | 6.0490517   | h    | 1                | 0              |
| 25               | 10.2174927         | 0.30104548  | 5.84344669  | h    | 1                | 0              |
| 26               | 7.78888176         | -1.97598268 | 2.48551547  | h    | 1                | 0              |
| 27               | 9.95695608         | -4.55282436 | 2.68059619  | h    | 1                | 0              |
| 28               | 14.06924262        | 0.47277832  | -2.10322755 | h    | 1                | 0              |
| 29               | 11.88767477        | 2.82674075  | -3.09773204 | h    | 1                | 0              |
| 30               | 18.56514196        | 1.02575211  | 3.14084354  | h    | 1                | 0              |
| 31               | 17.27301327        | 6.05805966  | -1.40924113 | h    | 1                | 0              |
| 32               | 11.94608061        | 7.13595691  | -1.08011639 | h    | 1                | 0              |

|    |             |             |            |   |   |   |
|----|-------------|-------------|------------|---|---|---|
| 33 | 11.44169789 | 5.85014879  | 1.94679588 | h | 1 | 0 |
| 34 | 15.60950889 | 13.24001216 | 2.59347537 | h | 1 | 0 |
| 35 | 13.27049224 | 13.35301484 | 5.04950462 | h | 1 | 0 |
| 36 | 16.05989513 | 11.45786482 | 5.40969482 | h | 1 | 0 |

---

### 3S\_6

| Center<br>Number | Atomic Coordinates |             |             | Atom | Atomic<br>Number | Atomic<br>Type |
|------------------|--------------------|-------------|-------------|------|------------------|----------------|
|                  | X                  | Y           | Z           |      |                  |                |
| 1                | 9.55740941         | -7.38870908 | 8.72550547  | c    | 6                | 0              |
| 2                | 8.76085126         | -4.81121905 | 7.67384142  | c    | 6                | 0              |
| 3                | 10.45646929        | -3.91111137 | 5.4993021   | c    | 6                | 0              |
| 4                | 9.63484619         | -1.35834945 | 4.46799493  | c    | 6                | 0              |
| 5                | 11.35290068        | -0.68058041 | 2.45104067  | o    | 8                | 0              |
| 6                | 10.84755666        | 1.50499061  | 1.24788288  | c    | 6                | 0              |
| 7                | 12.80569693        | 2.06379196  | -0.76916676 | c    | 6                | 0              |
| 8                | 14.63424291        | 4.26685026  | -0.12915333 | c    | 6                | 0              |
| 9                | 16.20623434        | 3.5169937   | 2.21538015  | c    | 6                | 0              |
| 10               | 14.92106622        | 3.92745885  | 4.39956966  | o    | 8                | 0              |
| 11               | 18.30130965        | 2.62105649  | 2.15939695  | o    | 8                | 0              |
| 12               | 16.23559467        | 4.43966833  | -2.24651718 | o    | 8                | 0              |
| 13               | 13.19875547        | 6.77067748  | 0.30028991  | c    | 6                | 0              |
| 14               | 14.98860422        | 8.93706534  | 0.82547396  | c    | 6                | 0              |
| 15               | 13.75142974        | 11.01896964 | 1.57678283  | o    | 8                | 0              |
| 16               | 15.30143334        | 13.20453763 | 2.05795097  | c    | 6                | 0              |
| 17               | 17.27922516        | 8.84523672  | 0.58166939  | o    | 8                | 0              |
| 18               | 9.04551131         | 2.84145449  | 1.73149951  | o    | 8                | 0              |
| 19               | 11.49634341        | -7.33477748 | 9.45155935  | h    | 1                | 0              |
| 20               | 8.32061253         | -7.9826735  | 10.27421999 | h    | 1                | 0              |
| 21               | 9.4794             | -8.85120615 | 7.26080861  | h    | 1                | 0              |
| 22               | 6.79355047         | -4.90932726 | 7.01887598  | h    | 1                | 0              |
| 23               | 8.7885963          | -3.40302569 | 9.19970651  | h    | 1                | 0              |
| 24               | 10.43009738        | -5.30074645 | 3.9594747   | h    | 1                | 0              |

|    |             |             |             |   |   |   |
|----|-------------|-------------|-------------|---|---|---|
| 25 | 12.4236841  | -3.78111226 | 6.14323554  | h | 1 | 0 |
| 26 | 9.6996096   | 0.12217178  | 5.91490709  | h | 1 | 0 |
| 27 | 7.7068208   | -1.40771877 | 3.71780676  | h | 1 | 0 |
| 28 | 13.95326288 | 0.39328866  | -1.15204355 | h | 1 | 0 |
| 29 | 11.81406613 | 2.59678807  | -2.50349639 | h | 1 | 0 |
| 30 | 16.01655513 | 3.33686793  | 5.75177468  | h | 1 | 0 |
| 31 | 17.54541072 | 5.64513123  | -1.79548453 | h | 1 | 0 |
| 32 | 12.14860951 | 7.21655397  | -1.42944386 | h | 1 | 0 |
| 33 | 11.80739211 | 6.62433868  | 1.81528715  | h | 1 | 0 |
| 34 | 16.65719052 | 12.81116777 | 3.56487482  | h | 1 | 0 |
| 35 | 16.33292936 | 13.75076612 | 0.35407072  | h | 1 | 0 |
| 36 | 13.99535128 | 14.6923653  | 2.62479426  | h | 1 | 0 |

### 3S\_7

| Center<br>Number | Atomic Coordinates |             |             | Atom | Atomic<br>Number | Atomic<br>Type |
|------------------|--------------------|-------------|-------------|------|------------------|----------------|
|                  | X                  | Y           | Z           |      |                  |                |
| 1                | 10.39436822        | -7.6103645  | 6.93676111  | c    | 6                | 0              |
| 2                | 9.73585222         | -5.42962647 | 5.15003171  | c    | 6                | 0              |
| 3                | 9.59424609         | -2.86818208 | 6.50226632  | c    | 6                | 0              |
| 4                | 8.93947989         | -0.66556024 | 4.77635508  | c    | 6                | 0              |
| 5                | 10.98617292        | -0.36465768 | 2.97863452  | o    | 8                | 0              |
| 6                | 10.66506906        | 1.44073133  | 1.21441903  | c    | 6                | 0              |
| 7                | 12.99621407        | 1.71810843  | -0.43045039 | c    | 6                | 0              |
| 8                | 14.65591834        | 4.03644221  | 0.26202782  | c    | 6                | 0              |
| 9                | 15.47758538        | 3.75754586  | 3.04952588  | c    | 6                | 0              |
| 10               | 17.65605575        | 2.47681211  | 3.31751507  | o    | 8                | 0              |
| 11               | 14.25694209        | 4.54639105  | 4.82480633  | o    | 8                | 0              |
| 12               | 16.72317229        | 3.92181146  | -1.41490452 | o    | 8                | 0              |
| 13               | 13.1858426         | 6.53692975  | -0.03173587 | c    | 6                | 0              |
| 14               | 14.84526243        | 8.79552439  | 0.53395867  | c    | 6                | 0              |
| 15               | 13.49237474        | 10.90615456 | 0.87398596  | o    | 8                | 0              |
| 16               | 14.92602949        | 13.16750807 | 1.36867318  | c    | 6                | 0              |

|    |             |             |             |   |   |   |
|----|-------------|-------------|-------------|---|---|---|
| 17 | 17.15169602 | 8.74137391  | 0.63775655  | o | 8 | 0 |
| 18 | 8.75936409  | 2.69994324  | 0.99971327  | o | 8 | 0 |
| 19 | 8.9845941   | -7.80217319 | 8.44307173  | h | 1 | 0 |
| 20 | 10.48045941 | -9.41319763 | 5.92469076  | h | 1 | 0 |
| 21 | 12.23447792 | -7.30895684 | 7.83970981  | h | 1 | 0 |
| 22 | 11.14302931 | -5.31578501 | 3.6335374   | h | 1 | 0 |
| 23 | 7.91548538  | -5.81107293 | 4.22622421  | h | 1 | 0 |
| 24 | 11.3954908  | -2.46560733 | 7.44967817  | h | 1 | 0 |
| 25 | 8.15097972  | -2.93975711 | 7.99343003  | h | 1 | 0 |
| 26 | 8.7368439   | 1.10552467  | 5.82524658  | h | 1 | 0 |
| 27 | 7.18253849  | -0.99164237 | 3.73204129  | h | 1 | 0 |
| 28 | 14.18593239 | 0.03743429  | -0.3021885  | h | 1 | 0 |
| 29 | 12.39483415 | 1.96430694  | -2.39185675 | h | 1 | 0 |
| 30 | 17.95447097 | 2.36718862  | 5.12796933  | h | 1 | 0 |
| 31 | 17.77308051 | 5.37688684  | -1.01061578 | h | 1 | 0 |
| 32 | 12.53981539 | 6.69061833  | -1.99435907 | h | 1 | 0 |
| 33 | 11.51006384 | 6.58611888  | 1.16599094  | h | 1 | 0 |
| 34 | 13.53164111 | 14.66960032 | 1.56790229  | h | 1 | 0 |
| 35 | 16.02334036 | 12.957687   | 3.10498022  | h | 1 | 0 |
| 36 | 16.2117525  | 13.5670114  | -0.19711735 | h | 1 | 0 |

### 3S\_8

| Center<br>Number | Atomic Coordinates |             |             | Atom | Atomic<br>Number | Atomic<br>Type |
|------------------|--------------------|-------------|-------------|------|------------------|----------------|
|                  | X                  | Y           | Z           |      |                  |                |
| 1                | 12.28973763        | -1.97350498 | 9.14831118  | c    | 6                | 0              |
| 2                | 11.51179957        | -2.84235872 | 6.49888461  | c    | 6                | 0              |
| 3                | 9.1848358          | -1.43201112 | 5.49413678  | c    | 6                | 0              |
| 4                | 8.55715086         | -2.0352557  | 2.7457347   | c    | 6                | 0              |
| 5                | 10.5930374         | -1.20681225 | 1.09951801  | o    | 8                | 0              |
| 6                | 10.36840902        | 1.10760234  | 0.05433984  | c    | 6                | 0              |
| 7                | 12.74161446        | 1.81732843  | -1.38836306 | c    | 6                | 0              |
| 8                | 14.40955093        | 3.80295319  | -0.01595376 | c    | 6                | 0              |

|    |             |             |             |   |   |   |
|----|-------------|-------------|-------------|---|---|---|
| 9  | 15.1314323  | 2.73435667  | 2.60461727  | c | 6 | 0 |
| 10 | 17.1529684  | 1.19919376  | 2.52355451  | o | 8 | 0 |
| 11 | 13.9615484  | 3.16792778  | 4.53275857  | o | 8 | 0 |
| 12 | 16.53960837 | 4.10469162  | -1.58867844 | o | 8 | 0 |
| 13 | 13.00129924 | 6.32623825  | 0.36153248  | c | 6 | 0 |
| 14 | 14.68007532 | 8.27910558  | 1.60382974  | c | 6 | 0 |
| 15 | 13.35256054 | 10.20956349 | 2.55534231  | o | 8 | 0 |
| 16 | 14.81143906 | 12.19066318 | 3.72224325  | c | 6 | 0 |
| 17 | 16.98466692 | 8.15803836  | 1.70435519  | o | 8 | 0 |
| 18 | 8.52261648  | 2.45570473  | 0.25767884  | o | 8 | 0 |
| 19 | 10.74000836 | -2.20254282 | 10.50483548 | h | 1 | 0 |
| 20 | 13.90288737 | -3.06120141 | 9.8569814   | h | 1 | 0 |
| 21 | 12.82561797 | 0.02541196  | 9.12632626  | h | 1 | 0 |
| 22 | 13.08873928 | -2.55408337 | 5.18617956  | h | 1 | 0 |
| 23 | 11.12634124 | -4.88345488 | 6.50534894  | h | 1 | 0 |
| 24 | 9.46851536  | 0.61304413  | 5.66701675  | h | 1 | 0 |
| 25 | 7.52183772  | -1.90403138 | 6.64499589  | h | 1 | 0 |
| 26 | 6.80978066  | -1.11489255 | 2.14782575  | h | 1 | 0 |
| 27 | 8.41727384  | -4.07259062 | 2.42260295  | h | 1 | 0 |
| 28 | 13.91032486 | 0.15361469  | -1.73412333 | h | 1 | 0 |
| 29 | 12.18990288 | 2.63853818  | -3.20270702 | h | 1 | 0 |
| 30 | 17.40145394 | 0.59594974  | 4.24202591  | h | 1 | 0 |
| 31 | 17.57821158 | 5.38965418  | -0.77802433 | h | 1 | 0 |
| 32 | 12.44913976 | 7.04836882  | -1.50030043 | h | 1 | 0 |
| 33 | 11.27441756 | 6.08623308  | 1.45964598  | h | 1 | 0 |
| 34 | 13.43637836 | 13.58861617 | 4.35053701  | h | 1 | 0 |
| 35 | 15.87949859 | 11.44693853 | 5.32507326  | h | 1 | 0 |
| 36 | 16.12624449 | 13.01924628 | 2.36214184  | h | 1 | 0 |

3S\_9

| Center<br>Number | Atomic Coordinates |             |             | Atom | Atomic<br>Number | Atomic<br>Type |
|------------------|--------------------|-------------|-------------|------|------------------|----------------|
|                  | X                  | Y           | Z           |      |                  |                |
| 1                | 6.24570534         | -3.51646528 | 9.23397318  | c    | 6                | 0              |
| 2                | 8.52154206         | -2.74075059 | 7.62187976  | c    | 6                | 0              |
| 3                | 8.45123839         | -3.8859315  | 4.95860708  | c    | 6                | 0              |
| 4                | 10.68816931        | -3.16082789 | 3.30798781  | c    | 6                | 0              |
| 5                | 10.58210385        | -0.4492538  | 2.88883298  | o    | 8                | 0              |
| 6                | 12.37854073        | 0.53417612  | 1.41025473  | c    | 6                | 0              |
| 7                | 12.04486215        | 3.35178141  | 1.04074498  | c    | 6                | 0              |
| 8                | 14.42994449        | 4.5628538   | -0.11794991 | c    | 6                | 0              |
| 9                | 16.63631668        | 4.26950545  | 1.77073883  | c    | 6                | 0              |
| 10               | 18.89511887        | 4.03330623  | 0.63161767  | o    | 8                | 0              |
| 11               | 16.37694981        | 4.31802607  | 4.04998265  | o    | 8                | 0              |
| 12               | 14.99127724        | 3.51335325  | -2.50119125 | o    | 8                | 0              |
| 13               | 14.05124069        | 7.4264003   | -0.63289049 | c    | 6                | 0              |
| 14               | 13.48741708        | 8.95815767  | 1.72063755  | c    | 6                | 0              |
| 15               | 15.54298229        | 10.24594358 | 2.5011038   | o    | 8                | 0              |
| 16               | 15.23376908        | 11.62617043 | 4.8235042   | c    | 6                | 0              |
| 17               | 11.46247822        | 9.01746273  | 2.79570647  | o    | 8                | 0              |
| 18               | 14.06159601        | -0.7222709  | 0.44655792  | o    | 8                | 0              |
| 19               | 6.14921504         | -5.57373631 | 9.4618365   | h    | 1                | 0              |
| 20               | 6.34325096         | -2.67911616 | 11.12324074 | h    | 1                | 0              |
| 21               | 4.46845473         | -2.9003841  | 8.36604249  | h    | 1                | 0              |
| 22               | 8.60360366         | -0.67702313 | 7.46871206  | h    | 1                | 0              |
| 23               | 10.27664283        | -3.32473427 | 8.56615655  | h    | 1                | 0              |
| 24               | 6.69883684         | -3.3332466  | 3.99467357  | h    | 1                | 0              |
| 25               | 8.42341094         | -5.95790794 | 5.08488061  | h    | 1                | 0              |
| 26               | 10.64006727        | -4.11132962 | 1.47212632  | h    | 1                | 0              |
| 27               | 12.49692354        | -3.61208516 | 4.2073912   | h    | 1                | 0              |
| 28               | 10.45985875        | 3.64581551  | -0.26043189 | h    | 1                | 0              |
| 29               | 11.53243803        | 4.23263022  | 2.83239164  | h    | 1                | 0              |
| 30               | 20.13168377        | 3.92159306  | 1.98710635  | h    | 1                | 0              |

|    |             |             |             |   |   |   |
|----|-------------|-------------|-------------|---|---|---|
| 31 | 15.22861072 | 1.71285945  | -2.20689919 | h | 1 | 0 |
| 32 | 15.75349425 | 8.12407508  | -1.56662926 | h | 1 | 0 |
| 33 | 12.45478197 | 7.60499918  | -1.9324621  | h | 1 | 0 |
| 34 | 17.02441917 | 12.5952056  | 5.13631713  | h | 1 | 0 |
| 35 | 13.68718273 | 12.98484405 | 4.66032787  | h | 1 | 0 |
| 36 | 14.83028678 | 10.3250489  | 6.37555119  | h | 1 | 0 |

### 3S\_10

| Center<br>Number | Atomic Coordinates |             |             | Atom | Atomic<br>Number | Atomic<br>Type |
|------------------|--------------------|-------------|-------------|------|------------------|----------------|
|                  | X                  | Y           | Z           |      |                  |                |
| 1                | 4.65000254         | -4.37980623 | 6.91775054  | c    | 6                | 0              |
| 2                | 6.79302649         | -3.66879881 | 5.10601411  | c    | 6                | 0              |
| 3                | 9.39794386         | -3.69007035 | 6.38176185  | c    | 6                | 0              |
| 4                | 11.56758267        | -3.01133783 | 4.62455767  | c    | 6                | 0              |
| 5                | 11.21632753        | -0.41021759 | 3.82004385  | o    | 8                | 0              |
| 6                | 12.87746969        | 0.48947279  | 2.14345276  | c    | 6                | 0              |
| 7                | 12.29015296        | 3.1869757   | 1.39191183  | c    | 6                | 0              |
| 8                | 14.54810315        | 4.42601314  | 0.02720744  | c    | 6                | 0              |
| 9                | 16.7926146         | 4.5777219   | 1.88763806  | c    | 6                | 0              |
| 10               | 19.05068899        | 4.44347515  | 0.72974603  | o    | 8                | 0              |
| 11               | 16.55585941        | 4.86135617  | 4.15186952  | o    | 8                | 0              |
| 12               | 15.17239027        | 3.11246356  | -2.20415898 | o    | 8                | 0              |
| 13               | 13.91877408        | 7.15127429  | -0.85761034 | c    | 6                | 0              |
| 14               | 13.24550306        | 8.92929848  | 1.28493414  | c    | 6                | 0              |
| 15               | 15.20055747        | 10.45555652 | 1.87023997  | o    | 8                | 0              |
| 16               | 14.79581361        | 12.09322046 | 4.00341098  | c    | 6                | 0              |
| 17               | 11.22516758        | 8.97395242  | 2.36938952  | o    | 8                | 0              |
| 18               | 14.63565962        | -0.75124306 | 1.30173591  | o    | 8                | 0              |
| 19               | 4.54729224         | -3.05929041 | 8.51036496  | h    | 1                | 0              |
| 20               | 2.81604582         | -4.35116947 | 5.9601567   | h    | 1                | 0              |
| 21               | 4.92237712         | -6.27984264 | 7.69818261  | h    | 1                | 0              |
| 22               | 6.81258743         | -4.98437694 | 3.4990579   | h    | 1                | 0              |



|    |             |             |             |   |   |   |
|----|-------------|-------------|-------------|---|---|---|
| 23 | 6.44554546  | -1.78676068 | 4.31296696  | h | 1 | 0 |
| 24 | 9.79093646  | -5.57953778 | 7.14737041  | h | 1 | 0 |
| 25 | 9.4074662   | -2.38806966 | 7.99651953  | h | 1 | 0 |
| 26 | 11.61692319 | -4.21973261 | 2.94526283  | h | 1 | 0 |
| 27 | 13.40327945 | -3.15842589 | 5.56576665  | h | 1 | 0 |
| 28 | 10.67553839 | 3.15529883  | 0.09376101  | h | 1 | 0 |
| 29 | 11.71422585 | 4.26140046  | 3.05384319  | h | 1 | 0 |
| 30 | 20.30800881 | 4.61871137  | 2.05911983  | h | 1 | 0 |
| 31 | 15.55537781 | 1.39205161  | -1.67582068 | h | 1 | 0 |
| 32 | 15.54696051 | 7.859014    | -1.90886578 | h | 1 | 0 |
| 33 | 12.30155491 | 7.01822767  | -2.13654817 | h | 1 | 0 |
| 34 | 13.15333283 | 13.30421129 | 3.68812432  | h | 1 | 0 |
| 35 | 14.49285383 | 10.9735223  | 5.71217107  | h | 1 | 0 |
| 36 | 16.51125371 | 13.2213235  | 4.17029026  | h | 1 | 0 |

### 3S\_11

| Center<br>Number | Atomic Coordinates |             |             | Atom | Atomic<br>Number | Atomic<br>Type |
|------------------|--------------------|-------------|-------------|------|------------------|----------------|
|                  | X                  | Y           | Z           |      |                  |                |
| 1                | 6.37764163         | -6.52974416 | 8.62272429  | c    | 6                | 0              |
| 2                | 8.51859718         | -5.95420559 | 6.75966091  | c    | 6                | 0              |
| 3                | 8.65041176         | -3.14877268 | 6.0331356   | c    | 6                | 0              |
| 4                | 10.77906582        | -2.60958197 | 4.18029334  | c    | 6                | 0              |
| 5                | 10.73270457        | 0.07240216  | 3.61698393  | o    | 8                | 0              |
| 6                | 12.43318973        | 0.89706872  | 1.9320698   | c    | 6                | 0              |
| 7                | 12.15542699        | 3.69991952  | 1.42957371  | c    | 6                | 0              |
| 8                | 14.33041639        | 4.72092178  | -0.22499205 | c    | 6                | 0              |
| 9                | 16.9226748         | 4.37406771  | 1.07470298  | c    | 6                | 0              |
| 10               | 16.82623747        | 4.96057037  | 3.57169831  | o    | 8                | 0              |
| 11               | 18.83919326        | 3.72206095  | 0.02730662  | o    | 8                | 0              |
| 12               | 14.36501752        | 3.51695224  | -2.59722592 | o    | 8                | 0              |
| 13               | 13.97570401        | 7.56515305  | -0.85275345 | c    | 6                | 0              |
| 14               | 13.85165152        | 9.29462708  | 1.42717245  | c    | 6                | 0              |

|    |             |             |             |   |   |   |
|----|-------------|-------------|-------------|---|---|---|
| 15 | 15.9569779  | 10.71822287 | 1.62839766  | o | 8 | 0 |
| 16 | 16.02989502 | 12.37782184 | 3.77903144  | c | 6 | 0 |
| 17 | 12.09584342 | 9.41371157  | 2.89810218  | o | 8 | 0 |
| 18 | 13.98937374 | -0.47136064 | 0.91924167  | o | 8 | 0 |
| 19 | 4.53481341  | -6.02507312 | 7.82362081  | h | 1 | 0 |
| 20 | 6.32519459  | -8.54040165 | 9.10713229  | h | 1 | 0 |
| 21 | 6.60865357  | -5.46241474 | 10.38247249 | h | 1 | 0 |
| 22 | 10.3308506  | -6.53967927 | 7.58568468  | h | 1 | 0 |
| 23 | 8.27129608  | -7.09949545 | 5.04599897  | h | 1 | 0 |
| 24 | 8.92071035  | -1.98924761 | 7.73119265  | h | 1 | 0 |
| 25 | 6.85315043  | -2.55162967 | 5.1881676   | h | 1 | 0 |
| 26 | 10.55850966 | -3.66445443 | 2.41351975  | h | 1 | 0 |
| 27 | 12.63268939 | -3.0906509  | 4.96551512  | h | 1 | 0 |
| 28 | 10.37571036 | 3.99064834  | 0.40894131  | h | 1 | 0 |
| 29 | 11.98662963 | 4.71916799  | 3.2144634   | h | 1 | 0 |
| 30 | 18.53987429 | 4.76249318  | 4.20582796  | h | 1 | 0 |
| 31 | 14.83184453 | 1.77100729  | -2.27078634 | h | 1 | 0 |
| 32 | 15.51501444 | 8.12422743  | -2.10652786 | h | 1 | 0 |
| 33 | 12.1916646  | 7.72945093  | -1.88474358 | h | 1 | 0 |
| 34 | 14.42784736 | 13.68095293 | 3.74731825  | h | 1 | 0 |
| 35 | 15.96652837 | 11.2858928  | 5.53157473  | h | 1 | 0 |
| 36 | 17.80751475 | 13.40739277 | 3.62713485  | h | 1 | 0 |

#### 4S\_1

| Center<br>Number | Atomic Coordinates |             |             | Atom | Atomic<br>Number | Atomic<br>Type |
|------------------|--------------------|-------------|-------------|------|------------------|----------------|
|                  | X                  | Y           | Z           |      |                  |                |
| 1                | -9.19247153        | -7.37828436 | -2.43993307 | c    | 6                | 0              |
| 2                | -6.5711661         | -6.81035526 | -1.35104296 | c    | 6                | 0              |
| 3                | -6.49354305        | -6.98746226 | 1.54266579  | c    | 6                | 0              |
| 4                | -3.92802692        | -6.38565218 | 2.68838655  | c    | 6                | 0              |
| 5                | -2.14703806        | -8.28079245 | 1.82666507  | o    | 8                | 0              |
| 6                | 0.2413181          | -8.01811413 | 2.66312537  | c    | 6                | 0              |

|    |              |              |             |   |   |   |
|----|--------------|--------------|-------------|---|---|---|
| 7  | 1.97805155   | -9.99042795  | 1.51957459  | c | 6 | 0 |
| 8  | 3.75374579   | -8.94549319  | -0.5661925  | c | 6 | 0 |
| 9  | 2.09496995   | -7.85181724  | -2.71025938 | c | 6 | 0 |
| 10 | 1.70322685   | -9.51324698  | -4.58025291 | o | 8 | 0 |
| 11 | 0.14253426   | -8.61660668  | -6.61871775 | c | 6 | 0 |
| 12 | 1.20404982   | -5.73621567  | -2.65245636 | o | 8 | 0 |
| 13 | 5.18861643   | -11.0507233  | -1.34891664 | o | 8 | 0 |
| 14 | 5.47083731   | -6.81812937  | 0.44785039  | c | 6 | 0 |
| 15 | 7.30153398   | -5.91657601  | -1.54521322 | c | 6 | 0 |
| 16 | 8.56531146   | -3.83042467  | -0.83518161 | o | 8 | 0 |
| 17 | 7.66237427   | -6.93602898  | -3.58191863 | o | 8 | 0 |
| 18 | 0.90981916   | -6.39630016  | 4.14248521  | o | 8 | 0 |
| 19 | -9.81541954  | -9.28941816  | -1.93858918 | h | 1 | 0 |
| 20 | -10.61130841 | -6.05139796  | -1.71849353 | h | 1 | 0 |
| 21 | -9.1985479   | -7.23834479  | -4.50482713 | h | 1 | 0 |
| 22 | -5.1795131   | -8.12709153  | -2.14053619 | h | 1 | 0 |
| 23 | -5.96545979  | -4.91244533  | -1.93280549 | h | 1 | 0 |
| 24 | -7.07851864  | -8.88266636  | 2.1519839   | h | 1 | 0 |
| 25 | -7.86353117  | -5.65934279  | 2.36193461  | h | 1 | 0 |
| 26 | -3.97782749  | -6.41811333  | 4.7560925   | h | 1 | 0 |
| 27 | -3.23298938  | -4.52750873  | 2.09957841  | h | 1 | 0 |
| 28 | 3.18202577   | -10.75016292 | 3.01834939  | h | 1 | 0 |
| 29 | 0.8876503    | -11.53826056 | 0.69895346  | h | 1 | 0 |
| 30 | 0.03284116   | -10.17746556 | -7.95811796 | h | 1 | 0 |
| 31 | 0.9955126    | -6.95608228  | -7.50158371 | h | 1 | 0 |
| 32 | -1.73756241  | -8.11585769  | -5.92541166 | h | 1 | 0 |
| 33 | 6.24005836   | -10.45728177 | -2.73338241 | h | 1 | 0 |
| 34 | 6.56999312   | -7.54300672  | 2.04738936  | h | 1 | 0 |
| 35 | 4.37361521   | -5.21886397  | 1.14820585  | h | 1 | 0 |
| 36 | 9.70905383   | -3.41434599  | -2.21302063 | h | 1 | 0 |

| Center<br>Number | Atomic Coordinates |              |             | Atom | Atomic<br>Number | Atomic<br>Type |
|------------------|--------------------|--------------|-------------|------|------------------|----------------|
|                  | X                  | Y            | Z           |      |                  |                |
| 1                | -11.21864995       | -4.95497586  | 2.77669754  | c    | 6                | 0              |
| 2                | -9.36171061        | -6.88272403  | 1.67234693  | c    | 6                | 0              |
| 3                | -6.5936575         | -6.05850554  | 1.94313524  | c    | 6                | 0              |
| 4                | -4.7780404         | -7.99600598  | 0.84676175  | c    | 6                | 0              |
| 5                | -2.23191054        | -7.03716798  | 1.18517621  | o    | 8                | 0              |
| 6                | -0.35373456        | -8.53405127  | 0.40208718  | c    | 6                | 0              |
| 7                | 2.21910555         | -7.38359067  | 0.89762342  | c    | 6                | 0              |
| 8                | 4.29890874         | -8.74653478  | -0.62370956 | c    | 6                | 0              |
| 9                | 3.77488908         | -8.36037402  | -3.4753452  | c    | 6                | 0              |
| 10               | 4.67435015         | -10.26197532 | -4.88433957 | o    | 8                | 0              |
| 11               | 4.34466481         | -9.96887383  | -7.56758958 | c    | 6                | 0              |
| 12               | 2.73490023         | -6.49973616  | -4.32830349 | o    | 8                | 0              |
| 13               | 4.45391619         | -11.32121349 | 0.04430618  | o    | 8                | 0              |
| 14               | 6.96323149         | -7.66965556  | -0.03001831 | c    | 6                | 0              |
| 15               | 7.25812226         | -4.89366167  | -0.65501374 | c    | 6                | 0              |
| 16               | 8.51028964         | -4.53585347  | -2.85536031 | o    | 8                | 0              |
| 17               | 6.47317254         | -3.15855452  | 0.61866651  | o    | 8                | 0              |
| 18               | -0.6974858         | -10.60558094 | -0.56282967 | o    | 8                | 0              |
| 19               | -10.87534574       | -4.65769681  | 4.79752397  | h    | 1                | 0              |
| 20               | -11.0405499        | -3.11903288  | 1.83479891  | h    | 1                | 0              |
| 21               | -13.17598538       | -5.58799855  | 2.5569896   | h    | 1                | 0              |
| 22               | -9.63077017        | -8.7164307   | 2.60835277  | h    | 1                | 0              |
| 23               | -9.7963359         | -7.19099521  | -0.33393121 | h    | 1                | 0              |
| 24               | -6.13655734        | -5.76028429  | 3.94390376  | h    | 1                | 0              |
| 25               | -6.2991518         | -4.24097778  | 0.98896115  | h    | 1                | 0              |
| 26               | -5.10153157        | -8.30670453  | -1.17368228 | h    | 1                | 0              |
| 27               | -4.93044848        | -9.82933297  | 1.79509377  | h    | 1                | 0              |
| 28               | 2.16471506         | -5.36437184  | 0.48937393  | h    | 1                | 0              |
| 29               | 2.63694131         | -7.59313131  | 2.91642432  | h    | 1                | 0              |
| 30               | 2.33909903         | -9.81906427  | -8.03629609 | h    | 1                | 0              |
| 31               | 5.16497957         | -11.65838174 | -8.41289356 | h    | 1                | 0              |
| 32               | 5.31810398         | -8.27257153  | -8.23237524 | h    | 1                | 0              |

|    |            |              |             |   |   |   |
|----|------------|--------------|-------------|---|---|---|
| 33 | 2.78703787 | -12.01949181 | -0.3015777  | h | 1 | 0 |
| 34 | 8.33653759 | -8.80106307  | -1.07388943 | h | 1 | 0 |
| 35 | 7.28727676 | -7.92056241  | 1.99473462  | h | 1 | 0 |
| 36 | 8.52778319 | -2.72066763  | -3.14616428 | h | 1 | 0 |

#### 4S\_3

| Center<br>Number | Atomic Coordinates |              |             | Atom | Atomic<br>Number | Atomic<br>Type |
|------------------|--------------------|--------------|-------------|------|------------------|----------------|
|                  | X                  | Y            | Z           |      |                  |                |
| 1                | -9.54946294        | -8.60984804  | -2.1804906  | c    | 6                | 0              |
| 2                | -6.96178181        | -7.5996092   | -1.36510884 | c    | 6                | 0              |
| 3                | -6.72588797        | -7.29299704  | 1.50917951  | c    | 6                | 0              |
| 4                | -4.1747559         | -6.29530064  | 2.38035195  | c    | 6                | 0              |
| 5                | -2.27261804        | -8.15006477  | 1.71879617  | o    | 8                | 0              |
| 6                | 0.11770869         | -7.58890616  | 2.39715335  | c    | 6                | 0              |
| 7                | 1.94586433         | -9.63672895  | 1.57200551  | c    | 6                | 0              |
| 8                | 3.87227321         | -8.84844851  | -0.51910199 | c    | 6                | 0              |
| 9                | 2.40329228         | -8.20236181  | -2.94688986 | c    | 6                | 0              |
| 10               | 1.24788372         | -5.95859454  | -2.84489528 | o    | 8                | 0              |
| 11               | -0.11405416        | -5.24126014  | -5.09178526 | c    | 6                | 0              |
| 12               | 2.22933565         | -9.69123055  | -4.68598493 | o    | 8                | 0              |
| 13               | 5.40290031         | -10.97045304 | -1.04623352 | o    | 8                | 0              |
| 14               | 5.58992882         | -6.69052588  | 0.37879211  | c    | 6                | 0              |
| 15               | 7.34635195         | -5.78760679  | -1.68376351 | c    | 6                | 0              |
| 16               | 9.50521702         | -4.81027865  | -0.73447054 | o    | 8                | 0              |
| 17               | 6.90508188         | -5.84449961  | -3.93388748 | o    | 8                | 0              |
| 18               | 0.70259694         | -5.68322746  | 3.5353337   | o    | 8                | 0              |
| 19               | -9.92207404        | -10.47015973 | -1.34858715 | h    | 1                | 0              |
| 20               | -11.07560597       | -7.34220898  | -1.58336248 | h    | 1                | 0              |
| 21               | -9.66619932        | -8.80912162  | -4.23667904 | h    | 1                | 0              |
| 22               | -5.47036865        | -8.87457182  | -2.03066978 | h    | 1                | 0              |
| 23               | -6.61348669        | -5.76378366  | -2.27352216 | h    | 1                | 0              |
| 24               | -7.0908941         | -9.10907475  | 2.44415016  | h    | 1                | 0              |

|    |             |              |             |   |   |   |
|----|-------------|--------------|-------------|---|---|---|
| 25 | -8.17703113 | -5.97629679  | 2.19535819  | h | 1 | 0 |
| 26 | -4.12055425 | -5.99067908  | 4.42530291  | h | 1 | 0 |
| 27 | -3.68791096 | -4.5010041   | 1.46767959  | h | 1 | 0 |
| 28 | 3.05961066  | -10.20656586 | 3.21888653  | h | 1 | 0 |
| 29 | 0.90934472  | -11.28486853 | 0.88756004  | h | 1 | 0 |
| 30 | -1.6159998  | -6.60042747  | -5.48997554 | h | 1 | 0 |
| 31 | 1.18163066  | -5.15652894  | -6.69627145 | h | 1 | 0 |
| 32 | -0.89943681 | -3.38045577  | -4.69031482 | h | 1 | 0 |
| 33 | 4.81993766  | -11.61000475 | -2.67048493 | h | 1 | 0 |
| 34 | 6.70701807  | -7.35324663  | 1.98588107  | h | 1 | 0 |
| 35 | 4.46540503  | -5.08757681  | 1.04617678  | h | 1 | 0 |
| 36 | 10.48177002 | -4.22496681  | -2.17751786 | h | 1 | 0 |

#### 4S\_4

| Center<br>Number | Atomic Coordinates |              |             | Atom | Atomic<br>Number | Atomic<br>Type |
|------------------|--------------------|--------------|-------------|------|------------------|----------------|
|                  | X                  | Y            | Z           |      |                  |                |
| 1                | -11.45371947       | -7.35375624  | -0.47803462 | c    | 6                | 0              |
| 2                | -9.00835946        | -6.13954895  | 0.48619681  | c    | 6                | 0              |
| 3                | -6.71079673        | -7.8941925   | 0.24730703  | c    | 6                | 0              |
| 4                | -4.30381339        | -6.66852661  | 1.22755332  | c    | 6                | 0              |
| 5                | -2.26135527        | -8.45853292  | 0.90544567  | o    | 8                | 0              |
| 6                | 0.00281515         | -7.73515053  | 1.81947237  | c    | 6                | 0              |
| 7                | 1.9978769          | -9.74653121  | 1.38125215  | c    | 6                | 0              |
| 8                | 4.12390379         | -9.0048076   | -0.49635596 | c    | 6                | 0              |
| 9                | 2.9575522          | -8.65806322  | -3.15376994 | c    | 6                | 0              |
| 10               | 1.78572075         | -6.39911643  | -3.36961171 | o    | 8                | 0              |
| 11               | 0.57726021         | -5.94566259  | -5.76469809 | c    | 6                | 0              |
| 12               | 3.03233367         | -10.22291673 | -4.81352868 | o    | 8                | 0              |
| 13               | 5.75047551         | -11.11364592 | -0.5239243  | o    | 8                | 0              |
| 14               | 5.54865415         | -6.61469344  | 0.37472167  | c    | 6                | 0              |
| 15               | 7.69789123         | -5.96322587  | -1.38281374 | c    | 6                | 0              |
| 16               | 8.88870642         | -3.81901417  | -0.69368422 | o    | 8                | 0              |

|    |              |              |             |   |   |   |
|----|--------------|--------------|-------------|---|---|---|
| 17 | 8.34249768   | -7.1907115   | -3.218793   | o | 8 | 0 |
| 18 | 0.36639083   | -5.73358599  | 2.88179696  | o | 8 | 0 |
| 19 | -11.29561688 | -7.87114012  | -2.47727019 | h | 1 | 0 |
| 20 | -11.90074359 | -9.07784813  | 0.57943197  | h | 1 | 0 |
| 21 | -13.05941241 | -6.06343989  | -0.28575351 | h | 1 | 0 |
| 22 | -8.64775011  | -4.38314054  | -0.56099298 | h | 1 | 0 |
| 23 | -9.2480468   | -5.5849318   | 2.47230926  | h | 1 | 0 |
| 24 | -6.43793557  | -8.43662286  | -1.73603484 | h | 1 | 0 |
| 25 | -7.04936559  | -9.65003513  | 1.29840986  | h | 1 | 0 |
| 26 | -4.44772268  | -6.16980002  | 3.23088491  | h | 1 | 0 |
| 27 | -3.83604826  | -4.93706945  | 0.19148128  | h | 1 | 0 |
| 28 | 2.9141832    | -10.14317468 | 3.19337609  | h | 1 | 0 |
| 29 | 1.13324422   | -11.48886824 | 0.69570489  | h | 1 | 0 |
| 30 | -0.90362792  | -7.34555152  | -6.10039098 | h | 1 | 0 |
| 31 | 1.95789088   | -6.04969418  | -7.29640796 | h | 1 | 0 |
| 32 | -0.22453785  | -4.05283835  | -5.63323253 | h | 1 | 0 |
| 33 | 6.82900215   | -10.9156027  | -1.99366276 | h | 1 | 0 |
| 34 | 6.3454111    | -6.96773382  | 2.25393433  | h | 1 | 0 |
| 35 | 4.29359342   | -4.9879179   | 0.56908719  | h | 1 | 0 |
| 36 | 10.24780888  | -3.5671779   | -1.90544486 | h | 1 | 0 |

#### 4S\_5

| Center<br>Number | Atomic Coordinates |              |             | Atom | Atomic<br>Number | Atomic<br>Type |
|------------------|--------------------|--------------|-------------|------|------------------|----------------|
|                  | X                  | Y            | Z           |      |                  |                |
| 1                | -10.80314044       | -6.29949635  | -1.04474633 | c    | 6                | 0              |
| 2                | -8.4940577         | -5.64320249  | 0.57336875  | c    | 6                | 0              |
| 3                | -6.27607137        | -7.46570157  | 0.15849386  | c    | 6                | 0              |
| 4                | -3.99458771        | -6.78124407  | 1.76384428  | c    | 6                | 0              |
| 5                | -2.0266186         | -8.60759464  | 1.23597417  | o    | 8                | 0              |
| 6                | 0.20976418         | -8.19101284  | 2.37665714  | c    | 6                | 0              |
| 7                | 2.19129146         | -10.06931783 | 1.50690222  | c    | 6                | 0              |
| 8                | 4.00420749         | -8.99733477  | -0.53427785 | c    | 6                | 0              |

|    |              |              |             |   |   |   |
|----|--------------|--------------|-------------|---|---|---|
| 9  | 2.4016405    | -8.1776524   | -2.83946538 | c | 6 | 0 |
| 10 | 2.09771838   | -10.04862235 | -4.51766562 | o | 8 | 0 |
| 11 | 0.55656262   | -9.43270385  | -6.67066004 | c | 6 | 0 |
| 12 | 1.47469956   | -6.0877696   | -3.05225074 | o | 8 | 0 |
| 13 | 5.65583282   | -11.0108981  | -1.10080027 | o | 8 | 0 |
| 14 | 5.46741992   | -6.67435678  | 0.44646262  | c | 6 | 0 |
| 15 | 7.32990121   | -5.72009403  | -1.49281387 | c | 6 | 0 |
| 16 | 8.27376567   | -3.43814136  | -0.89900173 | o | 8 | 0 |
| 17 | 7.97648679   | -6.85994648  | -3.39049554 | o | 8 | 0 |
| 18 | 0.58756459   | -6.49797076  | 3.87866079  | o | 8 | 0 |
| 19 | -10.34466171 | -6.23808346  | -3.06388667 | h | 1 | 0 |
| 20 | -11.49888018 | -8.20362766  | -0.61955086 | h | 1 | 0 |
| 21 | -12.35592811 | -4.97318062  | -0.71203307 | h | 1 | 0 |
| 22 | -7.88153646  | -3.70532951  | 0.15078532  | h | 1 | 0 |
| 23 | -9.02942495  | -5.65347089  | 2.57916514  | h | 1 | 0 |
| 24 | -5.71626525  | -7.45295434  | -1.83867043 | h | 1 | 0 |
| 25 | -6.86198813  | -9.40571724  | 0.60135484  | h | 1 | 0 |
| 26 | -4.4260575   | -6.83205578  | 3.78836466  | h | 1 | 0 |
| 27 | -3.27478645  | -4.89291347  | 1.32106859  | h | 1 | 0 |
| 28 | 3.34765132   | -10.60905705 | 3.13183163  | h | 1 | 0 |
| 29 | 1.30355621   | -11.75979316 | 0.72515999  | h | 1 | 0 |
| 30 | 1.37367929   | -7.84888705  | -7.71407637 | h | 1 | 0 |
| 31 | -1.35340156  | -8.92567735  | -6.06913223 | h | 1 | 0 |
| 32 | 0.52628206   | -11.1324267  | -7.83332667 | h | 1 | 0 |
| 33 | 6.77598018   | -10.38633392 | -2.4171374  | h | 1 | 0 |
| 34 | 6.53187639   | -7.21886184  | 2.13892915  | h | 1 | 0 |
| 35 | 4.19990464   | -5.1438566   | 0.99491629  | h | 1 | 0 |
| 36 | 9.46920459   | -3.0017875   | -2.22596741 | h | 1 | 0 |

4S\_6

| Center<br>Number | Atomic Coordinates |   |   | Atom | Atomic<br>Number | Atomic<br>Type |
|------------------|--------------------|---|---|------|------------------|----------------|
|                  | X                  | Y | Z |      |                  |                |



|    |              |              |             |   |   |   |
|----|--------------|--------------|-------------|---|---|---|
| 1  | -9.19087224  | -2.99322054  | 1.51212366  | c | 6 | 0 |
| 2  | -7.14143166  | -4.82127632  | 0.59617857  | c | 6 | 0 |
| 3  | -6.80607647  | -7.1027436   | 2.35448826  | c | 6 | 0 |
| 4  | -4.78902395  | -8.95970633  | 1.49483112  | c | 6 | 0 |
| 5  | -2.36795322  | -7.66776837  | 1.57399092  | o | 8 | 0 |
| 6  | -0.34795978  | -9.01151506  | 0.87309401  | c | 6 | 0 |
| 7  | 2.07598204   | -7.50635149  | 1.09160234  | c | 6 | 0 |
| 8  | 4.22764737   | -8.73441094  | -0.44386742 | c | 6 | 0 |
| 9  | 3.4890032    | -8.71021724  | -3.27413233 | c | 6 | 0 |
| 10 | 4.61309682   | -10.56940375 | -4.57420034 | o | 8 | 0 |
| 11 | 4.09846752   | -10.58785182 | -7.24452482 | c | 6 | 0 |
| 12 | 2.1089268    | -7.13134794  | -4.20843028 | o | 8 | 0 |
| 13 | 4.76928326   | -11.18850707 | 0.44311989  | o | 8 | 0 |
| 14 | 6.75064213   | -7.26627974  | -0.14409212 | c | 6 | 0 |
| 15 | 6.62403906   | -4.55654785  | -1.05135774 | c | 6 | 0 |
| 16 | 7.68716432   | -4.26909528  | -3.35919655 | o | 8 | 0 |
| 17 | 5.6774834    | -2.81651503  | 0.09973687  | o | 8 | 0 |
| 18 | -0.46215246  | -11.2143935  | 0.18359662  | o | 8 | 0 |
| 19 | -11.03420933 | -3.93064613  | 1.64320783  | h | 1 | 0 |
| 20 | -8.73850861  | -2.24020142  | 3.38836931  | h | 1 | 0 |
| 21 | -9.39357012  | -1.38638354  | 0.22477883  | h | 1 | 0 |
| 22 | -7.61027389  | -5.49669143  | -1.31056036 | h | 1 | 0 |
| 23 | -5.33341724  | -3.82447163  | 0.43052785  | h | 1 | 0 |
| 24 | -8.59245695  | -8.15166841  | 2.49451973  | h | 1 | 0 |
| 25 | -6.35174209  | -6.45824062  | 4.27356363  | h | 1 | 0 |
| 26 | -5.11369016  | -9.62040874  | -0.43947951 | h | 1 | 0 |
| 27 | -4.68745737  | -10.62101609 | 2.72267081  | h | 1 | 0 |
| 28 | 1.73668819   | -5.55621784  | 0.5204512   | h | 1 | 0 |
| 29 | 2.63274511   | -7.4781153   | 3.08751457  | h | 1 | 0 |
| 30 | 2.07203063   | -10.78743314 | -7.58856336 | h | 1 | 0 |
| 31 | 5.12681759   | -12.20719022 | -7.99439818 | h | 1 | 0 |
| 32 | 4.75859428   | -8.83564198  | -8.11689221 | h | 1 | 0 |
| 33 | 3.18700521   | -12.11918699 | 0.31047422  | h | 1 | 0 |
| 34 | 8.20261784   | -8.3117847   | -1.17083248 | h | 1 | 0 |
| 35 | 7.22123094   | -7.26047675  | 1.86735994  | h | 1 | 0 |

|    |            |             |             |   |   |   |
|----|------------|-------------|-------------|---|---|---|
| 36 | 7.43576108 | -2.50818655 | -3.82375438 | h | 1 | 0 |
|----|------------|-------------|-------------|---|---|---|

4S\_7

| Center<br>Number | Atomic Coordinates |              |             | Atom | Atomic<br>Number | Atomic<br>Type |
|------------------|--------------------|--------------|-------------|------|------------------|----------------|
|                  | X                  | Y            | Z           |      |                  |                |
| 1                | -9.51691322        | -8.82586414  | -2.19101245 | c    | 6                | 0              |
| 2                | -6.94568862        | -7.76128493  | -1.39341963 | c    | 6                | 0              |
| 3                | -6.71639156        | -7.39883159  | 1.47490578  | c    | 6                | 0              |
| 4                | -4.18278862        | -6.34285813  | 2.32813811  | c    | 6                | 0              |
| 5                | -2.24902183        | -8.17597978  | 1.69881265  | o    | 8                | 0              |
| 6                | 0.13073229         | -7.56388659  | 2.37028624  | c    | 6                | 0              |
| 7                | 1.99404295         | -9.59361983  | 1.57907903  | c    | 6                | 0              |
| 8                | 3.91782542         | -8.80225144  | -0.51296856 | c    | 6                | 0              |
| 9                | 2.4513767          | -8.21205866  | -2.95668738 | c    | 6                | 0              |
| 10               | 1.25065198         | -5.99109144  | -2.88624806 | o    | 8                | 0              |
| 11               | -0.11260871        | -5.32634087  | -5.14848916 | c    | 6                | 0              |
| 12               | 2.31773618         | -9.72302272  | -4.68031156 | o    | 8                | 0              |
| 13               | 5.48523723         | -10.90600385 | -1.00443738 | o    | 8                | 0              |
| 14               | 5.59620261         | -6.6049785   | 0.36464974  | c    | 6                | 0              |
| 15               | 7.35091379         | -5.70444287  | -1.70035757 | c    | 6                | 0              |
| 16               | 9.50085879         | -4.70496196  | -0.75379825 | o    | 8                | 0              |
| 17               | 6.91459457         | -5.78044391  | -3.95090326 | o    | 8                | 0              |
| 18               | 0.68201093         | -5.63121472  | 3.47937629  | o    | 8                | 0              |
| 19               | -9.6289831         | -9.0654535   | -4.24316258 | h    | 1                | 0              |
| 20               | -9.86168684        | -10.67571718 | -1.32446181 | h    | 1                | 0              |
| 21               | -11.06268959       | -7.57069548  | -1.61862197 | h    | 1                | 0              |
| 22               | -5.43445012        | -9.02504376  | -2.03505712 | h    | 1                | 0              |
| 23               | -6.62517447        | -5.93729015  | -2.33506754 | h    | 1                | 0              |
| 24               | -7.05148958        | -9.20354359  | 2.44242085  | h    | 1                | 0              |
| 25               | -8.18954668        | -6.09423157  | 2.13689766  | h    | 1                | 0              |
| 26               | -4.1340381         | -6.00129441  | 4.36736674  | h    | 1                | 0              |
| 27               | -3.7268933         | -4.55680438  | 1.38365105  | h    | 1                | 0              |

|    |             |              |             |   |   |   |
|----|-------------|--------------|-------------|---|---|---|
| 28 | 3.10889434  | -10.12534085 | 3.23799893  | h | 1 | 0 |
| 29 | 0.98603491  | -11.26624855 | 0.91176671  | h | 1 | 0 |
| 30 | -1.57713518 | -6.72583912  | -5.54606363 | h | 1 | 0 |
| 31 | 1.19242644  | -5.22209126  | -6.74429292 | h | 1 | 0 |
| 32 | -0.9468357  | -3.48239107  | -4.76817756 | h | 1 | 0 |
| 33 | 4.92361423  | -11.57377919 | -2.62498283 | h | 1 | 0 |
| 34 | 6.71295695  | -7.22736901  | 1.98788143  | h | 1 | 0 |
| 35 | 4.44174614  | -5.01080675  | 1.00122149  | h | 1 | 0 |
| 36 | 10.47609197 | -4.12279186  | -2.19906905 | h | 1 | 0 |

#### 4S\_8

| Center<br>Number | Atomic Coordinates |              |             | Atom | Atomic<br>Number | Atomic<br>Type |
|------------------|--------------------|--------------|-------------|------|------------------|----------------|
|                  | X                  | Y            | Z           |      |                  |                |
| 1                | -9.32262522        | -4.12565552  | 4.2756891   | c    | 6                | 0              |
| 2                | -7.23880525        | -6.00709101  | 3.56956833  | c    | 6                | 0              |
| 3                | -7.18564774        | -6.61306607  | 0.73376307  | c    | 6                | 0              |
| 4                | -5.15279406        | -8.49662127  | -0.02464228 | c    | 6                | 0              |
| 5                | -2.71042509        | -7.34773541  | 0.47582986  | o    | 8                | 0              |
| 6                | -0.67703618        | -8.7711735   | 0.00740733  | c    | 6                | 0              |
| 7                | 1.75969719         | -7.41409658  | 0.64720446  | c    | 6                | 0              |
| 8                | 4.05473062         | -8.72113953  | -0.58603397 | c    | 6                | 0              |
| 9                | 3.76979539         | -8.56339863  | -3.49286411 | c    | 6                | 0              |
| 10               | 4.95560725         | -10.45996976 | -4.67851364 | o    | 8                | 0              |
| 11               | 4.85722541         | -10.36608026 | -7.39463144 | c    | 6                | 0              |
| 12               | 2.6612424          | -6.86213253  | -4.56418482 | o    | 8                | 0              |
| 13               | 4.31698988         | -11.22910262 | 0.27509376  | o    | 8                | 0              |
| 14               | 6.57675463         | -7.41761552  | 0.15591309  | c    | 6                | 0              |
| 15               | 6.74398706         | -4.67892646  | -0.65236673 | c    | 6                | 0              |
| 16               | 8.17006281         | -4.38641529  | -2.75475202 | o    | 8                | 0              |
| 17               | 5.72735776         | -2.92111429  | 0.40815375  | o    | 8                | 0              |
| 18               | -0.79739813        | -10.93113402 | -0.80548988 | o    | 8                | 0              |
| 19               | -9.07419026        | -2.32532652  | 3.2818113   | h    | 1                | 0              |

|    |              |              |             |   |   |   |
|----|--------------|--------------|-------------|---|---|---|
| 20 | -11.19694989 | -4.85746306  | 3.78160881  | h | 1 | 0 |
| 21 | -9.31890956  | -3.72708076  | 6.30597935  | h | 1 | 0 |
| 22 | -5.39328811  | -5.25405637  | 4.13378323  | h | 1 | 0 |
| 23 | -7.5001799   | -7.76988313  | 4.63609739  | h | 1 | 0 |
| 24 | -6.92774671  | -4.86910667  | -0.35919757 | h | 1 | 0 |
| 25 | -9.01260461  | -7.40776027  | 0.14978995  | h | 1 | 0 |
| 26 | -5.24773703  | -8.97239233  | -2.0350337  | h | 1 | 0 |
| 27 | -5.28453373  | -10.25984612 | 1.05109614  | h | 1 | 0 |
| 28 | 1.61470894   | -5.43354203  | 0.09798969  | h | 1 | 0 |
| 29 | 2.0023508    | -7.46796437  | 2.70445834  | h | 1 | 0 |
| 30 | 2.89921964   | -10.42628648 | -8.04850878 | h | 1 | 0 |
| 31 | 5.89164391   | -12.02504468 | -8.04258609 | h | 1 | 0 |
| 32 | 5.74387196   | -8.63434166  | -8.08835329 | h | 1 | 0 |
| 33 | 2.73163508   | -12.06204582 | -0.14875863 | h | 1 | 0 |
| 34 | 8.11205227   | -8.51795825  | -0.67419676 | h | 1 | 0 |
| 35 | 6.72833229   | -7.50122855  | 2.21475065  | h | 1 | 0 |
| 36 | 8.09302125   | -2.59995651  | -3.1822513  | h | 1 | 0 |

#### 4S\_9

| Center<br>Number | Atomic Coordinates |             |             | Atom | Atomic<br>Number | Atomic<br>Type |
|------------------|--------------------|-------------|-------------|------|------------------|----------------|
|                  | X                  | Y           | Z           |      |                  |                |
| 1                | -7.34004233        | -4.62742564 | -2.3371168  | c    | 6                | 0              |
| 2                | -5.67552847        | -4.88901257 | 0.01758277  | c    | 6                | 0              |
| 3                | -5.69610843        | -7.57878701 | 1.10229654  | c    | 6                | 0              |
| 4                | -4.15657938        | -7.88709951 | 3.52067723  | c    | 6                | 0              |
| 5                | -1.54668449        | -7.09840288 | 3.1724207   | o    | 8                | 0              |
| 6                | 0.03680494         | -8.7674101  | 2.13738179  | c    | 6                | 0              |
| 7                | 2.67385371         | -7.70362476 | 1.81574173  | c    | 6                | 0              |
| 8                | 4.02148653         | -8.91118862 | -0.47076328 | c    | 6                | 0              |
| 9                | 2.48575993         | -8.32136408 | -2.89412188 | c    | 6                | 0              |
| 10               | 3.23359133         | -9.74566014 | -4.84760772 | o    | 8                | 0              |
| 11               | 1.97613407         | -9.24558311 | -7.20490989 | c    | 6                | 0              |

|    |             |              |             |   |   |   |
|----|-------------|--------------|-------------|---|---|---|
| 12 | 0.83356006  | -6.73005682  | -3.01759122 | o | 8 | 0 |
| 13 | 4.33172894  | -11.538483   | -0.13198285 | o | 8 | 0 |
| 14 | 6.74272064  | -7.86773663  | -0.79932113 | c | 6 | 0 |
| 15 | 6.83054024  | -5.05134778  | -1.28525096 | c | 6 | 0 |
| 16 | 6.93988939  | -4.51118298  | -3.78589514 | o | 8 | 0 |
| 17 | 6.76481722  | -3.42364952  | 0.32502477  | o | 8 | 0 |
| 18 | -0.55924221 | -10.92699022 | 1.55928101  | o | 8 | 0 |
| 19 | -6.70274867 | -5.89868835  | -3.84311343 | h | 1 | 0 |
| 20 | -9.31783028 | -5.08783113  | -1.92245189 | h | 1 | 0 |
| 21 | -7.28652614 | -2.69784101  | -3.08279237 | h | 1 | 0 |
| 22 | -3.72701266 | -4.3686119   | -0.45005146 | h | 1 | 0 |
| 23 | -6.31330212 | -3.55292074  | 1.47459909  | h | 1 | 0 |
| 24 | -4.99433835 | -8.91943097  | -0.31218241 | h | 1 | 0 |
| 25 | -7.64330683 | -8.15265027  | 1.54570319  | h | 1 | 0 |
| 26 | -4.17643418 | -9.84515518  | 4.17683545  | h | 1 | 0 |
| 27 | -4.84959685 | -6.64598751  | 5.02014478  | h | 1 | 0 |
| 28 | 2.58990462  | -5.6514603   | 1.67463337  | h | 1 | 0 |
| 29 | 3.76626671  | -8.17607688  | 3.5121321   | h | 1 | 0 |
| 30 | -0.06105456 | -9.5226515   | -7.01189083 | h | 1 | 0 |
| 31 | 2.76907235  | -10.58782954 | -8.55069777 | h | 1 | 0 |
| 32 | 2.33815705  | -7.30473844  | -7.81241679 | h | 1 | 0 |
| 33 | 2.66237279  | -12.1786004  | 0.32013944  | h | 1 | 0 |
| 34 | 7.61406304  | -8.90258986  | -2.35622247 | h | 1 | 0 |
| 35 | 7.7732024   | -8.26243415  | 0.94549005  | h | 1 | 0 |
| 36 | 6.89365271  | -2.67781114  | -3.91604    | h | 1 | 0 |

4S\_10

| Center<br>Number | Atomic Coordinates |             |             | Atom | Atomic<br>Number | Atomic<br>Type |
|------------------|--------------------|-------------|-------------|------|------------------|----------------|
|                  | X                  | Y           | Z           |      |                  |                |
| 1                | -10.25304396       | -8.65945904 | -0.82717186 | c    | 6                | 0              |
| 2                | -7.83441347        | -8.45767884 | 0.75129892  | c    | 6                | 0              |
| 3                | -6.33237036        | -6.0373005  | 0.20505826  | c    | 6                | 0              |

|    |              |              |             |   |   |   |
|----|--------------|--------------|-------------|---|---|---|
| 4  | -3.91981312  | -5.77759271  | 1.74471008  | c | 6 | 0 |
| 5  | -2.22847983  | -7.80631463  | 1.01454894  | o | 8 | 0 |
| 6  | 0.02359723   | -7.85594925  | 2.19999165  | c | 6 | 0 |
| 7  | 1.72044907   | -9.90697073  | 1.13925098  | c | 6 | 0 |
| 8  | 3.74111795   | -8.90303036  | -0.73481603 | c | 6 | 0 |
| 9  | 2.35562403   | -7.57372139  | -2.93983619 | c | 6 | 0 |
| 10 | 1.79888459   | -9.16463863  | -4.82898287 | o | 8 | 0 |
| 11 | 0.42953164   | -8.06209972  | -6.90361238 | c | 6 | 0 |
| 12 | 1.78079743   | -5.35112315  | -2.91052406 | o | 8 | 0 |
| 13 | 5.07453518   | -11.07204814 | -1.52311451 | o | 8 | 0 |
| 14 | 5.51967919   | -6.97523903  | 0.53700991  | c | 6 | 0 |
| 15 | 7.56416357   | -6.10366401  | -1.25237732 | c | 6 | 0 |
| 16 | 8.82847443   | -4.08197923  | -0.37871155 | o | 8 | 0 |
| 17 | 8.08609518   | -7.10249384  | -3.26476344 | o | 8 | 0 |
| 18 | 0.61993114   | -6.41085606  | 3.8793119   | o | 8 | 0 |
| 19 | -11.52427252 | -7.06461582  | -0.46306898 | h | 1 | 0 |
| 20 | -9.82594368  | -8.6655373   | -2.85438038 | h | 1 | 0 |
| 21 | -11.28950072 | -10.39890557 | -0.39994113 | h | 1 | 0 |
| 22 | -8.31395243  | -8.51761114  | 2.77107726  | h | 1 | 0 |
| 23 | -6.6232678   | -10.09981375 | 0.39334294  | h | 1 | 0 |
| 24 | -7.50874183  | -4.37505155  | 0.60866586  | h | 1 | 0 |
| 25 | -5.8524146   | -5.93960512  | -1.8112122  | h | 1 | 0 |
| 26 | -4.27864609  | -5.91450973  | 3.77874786  | h | 1 | 0 |
| 27 | -2.96427634  | -3.97873421  | 1.3873045   | h | 1 | 0 |
| 28 | 2.72609377   | -10.80515441 | 2.70491674  | h | 1 | 0 |
| 29 | 0.61079195   | -11.33678401 | 0.14870135  | h | 1 | 0 |
| 30 | 1.51996829   | -6.52873773  | -7.75482291 | h | 1 | 0 |
| 31 | -1.38391321  | -7.31562952  | -6.25506535 | h | 1 | 0 |
| 32 | 0.14683957   | -9.59116131  | -8.25409312 | h | 1 | 0 |
| 33 | 6.32299375   | -10.48071754 | -2.73530374 | h | 1 | 0 |
| 34 | 6.4362411    | -7.88207192  | 2.15859252  | h | 1 | 0 |
| 35 | 4.49274636   | -5.33978092  | 1.2587783   | h | 1 | 0 |
| 36 | 10.1172595   | -3.6864487   | -1.62882862 | h | 1 | 0 |

4S\_11

| Center<br>Number | Atomic Coordinates |              |             | Atom | Atomic<br>Number | Atomic<br>Type |
|------------------|--------------------|--------------|-------------|------|------------------|----------------|
|                  | X                  | Y            | Z           |      |                  |                |
| 1                | -7.95433512        | -2.98644276  | -1.46311001 | c    | 6                | 0              |
| 2                | -7.42163531        | -5.02749734  | 0.52119076  | c    | 6                | 0              |
| 3                | -4.90104352        | -6.39288804  | 0.07759236  | c    | 6                | 0              |
| 4                | -4.41107603        | -8.42103825  | 2.06571185  | c    | 6                | 0              |
| 5                | -2.08483074        | -9.78017959  | 1.55840061  | o    | 8                | 0              |
| 6                | 0.05702377         | -8.76570027  | 2.49408083  | c    | 6                | 0              |
| 7                | 2.35332761         | -10.30248179 | 1.73218742  | c    | 6                | 0              |
| 8                | 3.94370192         | -9.09078594  | -0.41269404 | c    | 6                | 0              |
| 9                | 2.23113015         | -8.80028373  | -2.76476163 | c    | 6                | 0              |
| 10               | 2.23661456         | -10.87161625 | -4.21905543 | o    | 8                | 0              |
| 11               | 0.61391595         | -10.76351026 | -6.39899573 | c    | 6                | 0              |
| 12               | 0.97563214         | -6.92524447  | -3.19224    | o    | 8                | 0              |
| 13               | 5.94584278         | -10.80365457 | -0.81718257 | o    | 8                | 0              |
| 14               | 4.94374445         | -6.45775535  | 0.33768469  | c    | 6                | 0              |
| 15               | 6.60006502         | -5.35048057  | -1.70495792 | c    | 6                | 0              |
| 16               | 7.06430681         | -2.87890363  | -1.35185121 | o    | 8                | 0              |
| 17               | 7.48474113         | -6.52317261  | -3.48352866 | o    | 8                | 0              |
| 18               | 0.13774427         | -6.86441775  | 3.77723702  | o    | 8                | 0              |
| 19               | -6.46842165        | -1.54386288  | -1.46652982 | h    | 1                | 0              |
| 20               | -8.0391195         | -3.798145    | -3.36657932 | h    | 1                | 0              |
| 21               | -9.75658129        | -2.03609244  | -1.10059666 | h    | 1                | 0              |
| 22               | -7.41534243        | -4.16772684  | 2.41065123  | h    | 1                | 0              |
| 23               | -8.97171148        | -6.41087243  | 0.52228478  | h    | 1                | 0              |
| 24               | -3.33983157        | -5.03323499  | 0.10969114  | h    | 1                | 0              |
| 25               | -4.883178          | -7.26885763  | -1.80098359 | h    | 1                | 0              |
| 26               | -5.87654534        | -9.87874663  | 2.03670708  | h    | 1                | 0              |
| 27               | -4.29951214        | -7.59848867  | 3.95747137  | h    | 1                | 0              |
| 28               | 3.59018292         | -10.48442813 | 3.37807418  | h    | 1                | 0              |
| 29               | 1.79549022         | -12.18686241 | 1.10558083  | h    | 1                | 0              |
| 30               | 0.86955167         | -12.56320726 | -7.3671467  | h    | 1                | 0              |

|    |             |              |             |   |   |   |
|----|-------------|--------------|-------------|---|---|---|
| 31 | 1.15474264  | -9.19149572  | -7.62394134 | h | 1 | 0 |
| 32 | -1.35433813 | -10.51886138 | -5.82177936 | h | 1 | 0 |
| 33 | 6.94789947  | -10.09091939 | -2.18350533 | h | 1 | 0 |
| 34 | 6.08894647  | -6.64418123  | 2.05420642  | h | 1 | 0 |
| 35 | 3.41340776  | -5.14728661  | 0.77107237  | h | 1 | 0 |
| 36 | 8.16554349  | -2.34888419  | -2.72543446 | h | 1 | 0 |

#### 4S\_12

| Center<br>Number | Atomic Coordinates |              |             | Atom | Atomic<br>Number | Atomic<br>Type |
|------------------|--------------------|--------------|-------------|------|------------------|----------------|
|                  | X                  | Y            | Z           |      |                  |                |
| 1                | -8.83966493        | -4.20668749  | -2.01432864 | c    | 6                | 0              |
| 2                | -7.93772923        | -5.63704634  | 0.3360552   | c    | 6                | 0              |
| 3                | -5.350779          | -6.89609034  | -0.03514224 | c    | 6                | 0              |
| 4                | -4.48853763        | -8.31275854  | 2.32162861  | c    | 6                | 0              |
| 5                | -2.11221982        | -9.60879349  | 1.90602934  | o    | 8                | 0              |
| 6                | 0.0106944          | -8.25560895  | 2.31122496  | c    | 6                | 0              |
| 7                | 2.3544777          | -9.84569215  | 1.86569655  | c    | 6                | 0              |
| 8                | 4.15623821         | -8.93093848  | -0.28182365 | c    | 6                | 0              |
| 9                | 2.78194228         | -9.19116319  | -2.83394265 | c    | 6                | 0              |
| 10               | 1.02364215         | -7.41635843  | -3.20737534 | o    | 8                | 0              |
| 11               | -0.26703289        | -7.5382418   | -5.60359558 | c    | 6                | 0              |
| 12               | 3.19837339         | -10.94492609 | -4.25637524 | o    | 8                | 0              |
| 13               | 6.24955353         | -10.58826659 | -0.32795346 | o    | 8                | 0              |
| 14               | 5.13895069         | -6.24677155  | 0.2124088   | c    | 6                | 0              |
| 15               | 6.74730414         | -5.27958714  | -1.93903733 | c    | 6                | 0              |
| 16               | 8.4922423          | -3.59565214  | -1.14055734 | o    | 8                | 0              |
| 17               | 6.50899164         | -5.8516981   | -4.14781426 | o    | 8                | 0              |
| 18               | 0.02408713         | -6.06279185  | 2.99315192  | o    | 8                | 0              |
| 19               | -7.5089275         | -2.70616459  | -2.53173119 | h    | 1                | 0              |
| 20               | -9.0189629         | -5.47620524  | -3.64154786 | h    | 1                | 0              |
| 21               | -10.68600554       | -3.32780642  | -1.69794601 | h    | 1                | 0              |
| 22               | -7.83931816        | -4.32862264  | 1.94455739  | h    | 1                | 0              |



|    |             |              |             |   |   |   |
|----|-------------|--------------|-------------|---|---|---|
| 23 | -9.34180459 | -7.07836825  | 0.84829779  | h | 1 | 0 |
| 24 | -3.92857169 | -5.4654927   | -0.50370799 | h | 1 | 0 |
| 25 | -5.43454454 | -8.22575952  | -1.6260894  | h | 1 | 0 |
| 26 | -5.8163542  | -9.81489447  | 2.8227256   | h | 1 | 0 |
| 27 | -4.27386683 | -7.0230461   | 3.92158718  | h | 1 | 0 |
| 28 | 3.46804185  | -9.82822742  | 3.6095412   | h | 1 | 0 |
| 29 | 1.82341759  | -11.79898076 | 1.46438709  | h | 1 | 0 |
| 30 | 1.08503938  | -7.24552351  | -7.13543731 | h | 1 | 0 |
| 31 | -1.65976357 | -6.02242846  | -5.55939906 | h | 1 | 0 |
| 32 | -1.18555252 | -9.37187053  | -5.83723316 | h | 1 | 0 |
| 33 | 6.01461595  | -11.64242228 | -1.81825074 | h | 1 | 0 |
| 34 | 6.25519607  | -6.25685786  | 1.95060233  | h | 1 | 0 |
| 35 | 3.56852223  | -4.93508728  | 0.51242046  | h | 1 | 0 |
| 36 | 9.385439    | -3.03084876  | -2.64440155 | h | 1 | 0 |

# 6S\_1

| Center<br>Number | Atomic Coordinates |             |             | Atom | Atomic<br>Number | Atomic<br>Type |
|------------------|--------------------|-------------|-------------|------|------------------|----------------|
|                  | X                  | Y           | Z           |      |                  |                |
| 1                | 5.26344804         | 0.71913308  | -3.02945553 | o    | 8                | 0              |
| 2                | 4.83618686         | -1.15153562 | -1.35485316 | c    | 6                | 0              |
| 3                | 3.19414767         | -0.32074563 | 0.82419774  | c    | 6                | 0              |
| 4                | 3.42366361         | -2.15119013 | 3.08620019  | c    | 6                | 0              |
| 5                | 6.19439182         | -2.38627916 | 4.00683306  | c    | 6                | 0              |
| 6                | 7.42159251         | -0.15287956 | 3.82550282  | o    | 8                | 0              |
| 7                | 10.01359771        | -0.12200505 | 4.71640639  | c    | 6                | 0              |
| 8                | 11.17683359        | 2.40241936  | 3.9857379   | c    | 6                | 0              |
| 9                | 11.44923552        | 2.80188973  | 1.12506147  | c    | 6                | 0              |
| 10               | 12.65307017        | 5.34929686  | 0.46079255  | c    | 6                | 0              |
| 11               | 7.12300619         | -4.30232565 | 4.82691173  | o    | 8                | 0              |
| 12               | 2.48953419         | -4.56113188 | 2.44952458  | o    | 8                | 0              |
| 13               | 1.76596265         | -1.29464406 | 5.34701059  | c    | 6                | 0              |
| 14               | 2.42091848         | 1.29137544  | 6.38849184  | c    | 6                | 0              |

|    |             |             |             |   |   |   |
|----|-------------|-------------|-------------|---|---|---|
| 15 | 3.63029176  | 1.11589234  | 8.62709499  | o | 8 | 0 |
| 16 | 4.34867393  | 3.48678585  | 9.74497557  | c | 6 | 0 |
| 17 | 1.9339562   | 3.28686894  | 5.36686537  | o | 8 | 0 |
| 18 | 5.69510216  | -3.26931816 | -1.63945145 | o | 8 | 0 |
| 19 | 6.28331167  | -0.00861931 | -4.37546443 | h | 1 | 0 |
| 20 | 3.63049997  | 1.62640369  | 1.33764698  | h | 1 | 0 |
| 21 | 1.22530395  | -0.35191229 | 0.17542461  | h | 1 | 0 |
| 22 | 11.01888303 | -1.71867463 | 3.86861812  | h | 1 | 0 |
| 23 | 9.9966191   | -0.40242366 | 6.76678904  | h | 1 | 0 |
| 24 | 10.04289733 | 3.93418632  | 4.80752888  | h | 1 | 0 |
| 25 | 13.04483201 | 2.50728689  | 4.88615196  | h | 1 | 0 |
| 26 | 12.59676275 | 1.26153188  | 0.33542772  | h | 1 | 0 |
| 27 | 9.58554426  | 2.65810003  | 0.23159632  | h | 1 | 0 |
| 28 | 14.54775628 | 5.52400928  | 1.2811773   | h | 1 | 0 |
| 29 | 12.83207859 | 5.58635492  | -1.58698817 | h | 1 | 0 |
| 30 | 11.51437579 | 6.92507589  | 1.1760397   | h | 1 | 0 |
| 31 | 3.61547922  | -5.22195046 | 1.15811637  | h | 1 | 0 |
| 32 | -0.19142156 | -1.24597396 | 4.68301068  | h | 1 | 0 |
| 33 | 1.93343347  | -2.73361277 | 6.81547265  | h | 1 | 0 |
| 34 | 2.6850321   | 4.66270584  | 10.08493101 | h | 1 | 0 |
| 35 | 5.27292682  | 3.00598159  | 11.52196514 | h | 1 | 0 |
| 36 | 5.64287544  | 4.50996273  | 8.50166474  | h | 1 | 0 |

## 6S\_2

| Center<br>Number | Atomic Coordinates |             |             | Atom | Atomic<br>Number | Atomic<br>Type |
|------------------|--------------------|-------------|-------------|------|------------------|----------------|
|                  | X                  | Y           | Z           |      |                  |                |
| 1                | 1.43778762         | -1.95229216 | -3.46515734 | o    | 8                | 0              |
| 2                | 3.02478404         | -2.64294788 | -1.60609388 | c    | 6                | 0              |
| 3                | 2.22697265         | -1.64096247 | 0.94420475  | c    | 6                | 0              |
| 4                | 4.3537548          | -1.93515201 | 2.91632514  | c    | 6                | 0              |
| 5                | 6.62308076         | -0.282622   | 2.09272642  | c    | 6                | 0              |
| 6                | 8.83870533         | -1.26017447 | 2.82895888  | o    | 8                | 0              |

|    |             |             |             |   |   |   |
|----|-------------|-------------|-------------|---|---|---|
| 7  | 11.07925254 | 0.22622272  | 2.27485855  | c | 6 | 0 |
| 8  | 11.66494278 | 2.06421733  | 4.41779196  | c | 6 | 0 |
| 9  | 12.26791284 | 0.77966073  | 6.94607389  | c | 6 | 0 |
| 10 | 12.77932464 | 2.67637378  | 9.0730408   | c | 6 | 0 |
| 11 | 6.36709497  | 1.7063379   | 0.97118478  | o | 8 | 0 |
| 12 | 5.01101079  | -4.49512486 | 3.25340641  | o | 8 | 0 |
| 13 | 3.49537983  | -1.03022234 | 5.57225878  | c | 6 | 0 |
| 14 | 2.73318363  | 1.72895579  | 5.65836262  | c | 6 | 0 |
| 15 | 4.56632201  | 3.1755505   | 6.68496706  | o | 8 | 0 |
| 16 | 4.05683575  | 5.84822423  | 6.69455868  | c | 6 | 0 |
| 17 | 0.74016858  | 2.56202226  | 4.88967977  | o | 8 | 0 |
| 18 | 4.87103901  | -3.96838687 | -1.99717725 | o | 8 | 0 |
| 19 | 2.07981164  | -2.70911874 | -5.01288867 | h | 1 | 0 |
| 20 | 1.61926821  | 0.31923879  | 0.75527497  | h | 1 | 0 |
| 21 | 0.58122493  | -2.73342741 | 1.57013567  | h | 1 | 0 |
| 22 | 10.78378317 | 1.22580969  | 0.49328613  | h | 1 | 0 |
| 23 | 12.57965065 | -1.17628781 | 2.04609906  | h | 1 | 0 |
| 24 | 13.27638381 | 3.22925705  | 3.81696205  | h | 1 | 0 |
| 25 | 10.05587265 | 3.35215703  | 4.63757298  | h | 1 | 0 |
| 26 | 10.68866139 | -0.45257776 | 7.47424593  | h | 1 | 0 |
| 27 | 13.91563639 | -0.46179037 | 6.70629442  | h | 1 | 0 |
| 28 | 11.12988355 | 3.88506069  | 9.4045457   | h | 1 | 0 |
| 29 | 13.21879499 | 1.71384334  | 10.85145749 | h | 1 | 0 |
| 30 | 14.37815011 | 3.91162394  | 8.61403412  | h | 1 | 0 |
| 31 | 5.60033503  | -5.08054607 | 1.61412346  | h | 1 | 0 |
| 32 | 1.86469125  | -2.17763258 | 6.11557494  | h | 1 | 0 |
| 33 | 5.04010721  | -1.40396692 | 6.88761903  | h | 1 | 0 |
| 34 | 5.67220493  | 6.71822787  | 7.63078196  | h | 1 | 0 |
| 35 | 3.87604988  | 6.54456587  | 4.75864444  | h | 1 | 0 |
| 36 | 2.31274574  | 6.25064729  | 7.72414883  | h | 1 | 0 |

| Center<br>Number | Atomic Coordinates |             |             | Atom | Atomic<br>Number | Atomic<br>Type |
|------------------|--------------------|-------------|-------------|------|------------------|----------------|
|                  | X                  | Y           | Z           |      |                  |                |
| 1                | 3.30568685         | -0.54995108 | -3.77577959 | o    | 8                | 0              |
| 2                | 3.95320496         | -1.86093416 | -1.68665564 | c    | 6                | 0              |
| 3                | 2.71946186         | -0.80996651 | 0.66104715  | c    | 6                | 0              |
| 4                | 3.41964399         | -2.3476975  | 3.03486807  | c    | 6                | 0              |
| 5                | 6.30200386         | -2.35715773 | 3.50668457  | c    | 6                | 0              |
| 6                | 7.29512299         | -0.02230633 | 3.28503119  | o    | 8                | 0              |
| 7                | 9.98959646         | 0.1760271   | 3.74328816  | c    | 6                | 0              |
| 8                | 10.77480268        | 2.89150366  | 3.23289951  | c    | 6                | 0              |
| 9                | 13.61661879        | 3.3030053   | 3.65078013  | c    | 6                | 0              |
| 10               | 14.44130013        | 6.03309987  | 3.15003422  | c    | 6                | 0              |
| 11               | 7.49974542         | -4.22364506 | 4.05602438  | o    | 8                | 0              |
| 12               | 2.56637307         | -4.86307451 | 2.80626143  | o    | 8                | 0              |
| 13               | 2.06455771         | -1.32989241 | 5.42977336  | c    | 6                | 0              |
| 14               | 2.59110917         | 1.41290976  | 6.06602651  | c    | 6                | 0              |
| 15               | 3.89148559         | 1.62607857  | 8.24970474  | o    | 8                | 0              |
| 16               | 4.45952779         | 4.17102788  | 9.01321569  | c    | 6                | 0              |
| 17               | 1.91620766         | 3.21497843  | 4.81741205  | o    | 8                | 0              |
| 18               | 5.37079973         | -3.66898591 | -1.76065136 | o    | 8                | 0              |
| 19               | 4.16594021         | -1.36166847 | -5.18280017 | h    | 1                | 0              |
| 20               | 3.20775433         | 1.1859977   | 0.86017609  | h    | 1                | 0              |
| 21               | 0.66690156         | -0.88883639 | 0.39873183  | h    | 1                | 0              |
| 22               | 10.96664519        | -1.16150813 | 2.50372352  | h    | 1                | 0              |
| 23               | 10.3702313         | -0.38794914 | 5.69821488  | h    | 1                | 0              |
| 24               | 10.26721603        | 3.38742289  | 1.28462805  | h    | 1                | 0              |
| 25               | 9.68949575         | 4.15780164  | 4.46692826  | h    | 1                | 0              |
| 26               | 14.11119756        | 2.77624636  | 5.59664016  | h    | 1                | 0              |
| 27               | 14.68617131        | 2.01989562  | 2.41845955  | h    | 1                | 0              |
| 28               | 13.45284338        | 7.35574359  | 4.40046112  | h    | 1                | 0              |
| 29               | 16.47289376        | 6.27281147  | 3.46003877  | h    | 1                | 0              |
| 30               | 14.03072639        | 6.59262592  | 1.19887211  | h    | 1                | 0              |
| 31               | 3.83051847         | -5.75756204 | 1.82637632  | h    | 1                | 0              |
| 32               | 0.03216414         | -1.52593153 | 5.09389647  | h    | 1                | 0              |

|    |            |             |             |   |   |   |
|----|------------|-------------|-------------|---|---|---|
| 33 | 2.57998212 | -2.55116172 | 7.00974263  | h | 1 | 0 |
| 34 | 2.72165432 | 5.2559457   | 9.27615618  | h | 1 | 0 |
| 35 | 5.48623973 | 4.00277192  | 10.79118148 | h | 1 | 0 |
| 36 | 5.61944508 | 5.11276628  | 7.58636249  | h | 1 | 0 |

#### 6S\_4

| Center<br>Number | Atomic Coordinates |             |             | Atom | Atomic<br>Number | Atomic<br>Type |
|------------------|--------------------|-------------|-------------|------|------------------|----------------|
|                  | X                  | Y           | Z           |      |                  |                |
| 1                | 4.95347135         | -1.42577775 | -3.19212122 | o    | 8                | 0              |
| 2                | 3.20674476         | -2.38630845 | -1.59073095 | c    | 6                | 0              |
| 3                | 4.41074922         | -3.79155462 | 0.59051372  | c    | 6                | 0              |
| 4                | 4.48029728         | -2.26127321 | 3.0925835   | c    | 6                | 0              |
| 5                | 5.98194156         | 0.20508583  | 2.61627883  | c    | 6                | 0              |
| 6                | 8.47387973         | -0.12053296 | 2.89431015  | o    | 8                | 0              |
| 7                | 10.02875564        | 2.07341546  | 2.3815294   | c    | 6                | 0              |
| 8                | 12.76728078        | 1.3219235   | 2.81614996  | c    | 6                | 0              |
| 9                | 14.59603008        | 3.52155598  | 2.33669819  | c    | 6                | 0              |
| 10               | 17.36513485        | 2.79044856  | 2.76308971  | c    | 6                | 0              |
| 11               | 4.98953191         | 2.17935073  | 1.98878686  | o    | 8                | 0              |
| 12               | 5.69753483         | -3.87460928 | 4.83048668  | o    | 8                | 0              |
| 13               | 1.80080065         | -1.56000925 | 4.00091076  | c    | 6                | 0              |
| 14               | 1.88119075         | -0.1729106  | 6.50051811  | c    | 6                | 0              |
| 15               | -0.29250055        | 1.02315361  | 6.99400588  | o    | 8                | 0              |
| 16               | -0.40180428        | 2.35179716  | 9.36775429  | c    | 6                | 0              |
| 17               | 3.68501508         | -0.16125216 | 7.94289313  | o    | 8                | 0              |
| 18               | 0.95449194         | -2.10859263 | -1.90511724 | o    | 8                | 0              |
| 19               | 4.01934362         | -0.48360972 | -4.46474947 | h    | 1                | 0              |
| 20               | 3.31186274         | -5.50442373 | 0.94825526  | h    | 1                | 0              |
| 21               | 6.35101836         | -4.32263801 | 0.13397396  | h    | 1                | 0              |
| 22               | 9.43743278         | 3.61284101  | 3.63264361  | h    | 1                | 0              |
| 23               | 9.68903321         | 2.68578636  | 0.43319871  | h    | 1                | 0              |
| 24               | 12.97710674        | 0.63770041  | 4.76262281  | h    | 1                | 0              |

|    |             |             |            |   |   |   |
|----|-------------|-------------|------------|---|---|---|
| 25 | 13.23537022 | -0.2716592  | 1.57408953 | h | 1 | 0 |
| 26 | 14.35439189 | 4.21038901  | 0.39293604 | h | 1 | 0 |
| 27 | 14.10217244 | 5.1119863   | 3.57647493 | h | 1 | 0 |
| 28 | 18.62798611 | 4.39135622  | 2.41202469 | h | 1 | 0 |
| 29 | 17.67983488 | 2.15429944  | 4.70892856 | h | 1 | 0 |
| 30 | 17.93503595 | 1.24929845  | 1.50197345 | h | 1 | 0 |
| 31 | 5.73016548  | -2.95106456 | 6.42134737 | h | 1 | 0 |
| 32 | 0.78798305  | -0.42448481 | 2.61185537 | h | 1 | 0 |
| 33 | 0.72235958  | -3.30841742 | 4.27387834 | h | 1 | 0 |
| 34 | 1.03819874  | 3.83036849  | 9.43076577 | h | 1 | 0 |
| 35 | -2.28866689 | 3.17192484  | 9.45262454 | h | 1 | 0 |
| 36 | -0.09955272 | 1.04971667  | 10.9418416 | h | 1 | 0 |

6S\_5

| Center<br>Number | Atomic Coordinates |             |             | Atom | Atomic<br>Number | Atomic<br>Type |
|------------------|--------------------|-------------|-------------|------|------------------|----------------|
|                  | X                  | Y           | Z           |      |                  |                |
| 1                | 6.37436761         | 0.29087932  | -2.48803761 | o    | 8                | 0              |
| 2                | 4.20664244         | -0.69169063 | -1.54113946 | c    | 6                | 0              |
| 3                | 4.70483152         | -2.83012845 | 0.29150696  | c    | 6                | 0              |
| 4                | 4.49229129         | -2.05261769 | 3.11316776  | c    | 6                | 0              |
| 5                | 6.39261926         | 0.11775988  | 3.61216835  | c    | 6                | 0              |
| 6                | 8.73038166         | -0.74694507 | 4.05112287  | o    | 8                | 0              |
| 7                | 10.69099226        | 1.14367605  | 4.39736179  | c    | 6                | 0              |
| 8                | 11.84399763        | 1.93459928  | 1.8761084   | c    | 6                | 0              |
| 9                | 13.1666112         | -0.21780126 | 0.4530551   | c    | 6                | 0              |
| 10               | 14.21548392        | 0.61502642  | -2.11306442 | c    | 6                | 0              |
| 11               | 5.80245415         | 2.3368988   | 3.53604765  | o    | 8                | 0              |
| 12               | 5.10071921         | -4.26733197 | 4.46482693  | o    | 8                | 0              |
| 13               | 1.81164193         | -1.11548251 | 3.77161811  | c    | 6                | 0              |
| 14               | 1.5956149          | -0.46118293 | 6.54708936  | c    | 6                | 0              |
| 15               | -0.39261985        | 1.02736094  | 7.02364177  | o    | 8                | 0              |
| 16               | -0.77172897        | 1.69887862  | 9.63462557  | c    | 6                | 0              |

|    |             |             |             |   |   |   |
|----|-------------|-------------|-------------|---|---|---|
| 17 | 3.02473979  | -1.22668692 | 8.19224028  | o | 8 | 0 |
| 18 | 2.13880487  | 0.10390394  | -2.12006558 | o | 8 | 0 |
| 19 | 5.87152568  | 1.69320261  | -3.56555124 | h | 1 | 0 |
| 20 | 3.30646184  | -4.31291106 | -0.04417766 | h | 1 | 0 |
| 21 | 6.59222129  | -3.61223035 | 0.00546135  | h | 1 | 0 |
| 22 | 12.08278806 | 0.21562464  | 5.61100495  | h | 1 | 0 |
| 23 | 9.87691235  | 2.76316425  | 5.38512526  | h | 1 | 0 |
| 24 | 10.35061773 | 2.75642805  | 0.69804268  | h | 1 | 0 |
| 25 | 13.19912212 | 3.4601451   | 2.26351724  | h | 1 | 0 |
| 26 | 14.70453879 | -0.97220644 | 1.62767721  | h | 1 | 0 |
| 27 | 11.82679171 | -1.77385585 | 0.18178573  | h | 1 | 0 |
| 28 | 15.57654303 | 2.16366895  | -1.90650941 | h | 1 | 0 |
| 29 | 15.17753539 | -0.94374521 | -3.07591714 | h | 1 | 0 |
| 30 | 12.69451378 | 1.27623537  | -3.35394837 | h | 1 | 0 |
| 31 | 4.91946884  | -3.82565277 | 6.24228787  | h | 1 | 0 |
| 32 | 1.2573517   | 0.50739054  | 2.62970456  | h | 1 | 0 |
| 33 | 0.47084318  | -2.64385644 | 3.37083857  | h | 1 | 0 |
| 34 | -2.4626832  | 2.87368569  | 9.66040656  | h | 1 | 0 |
| 35 | -1.04030768 | 0.00626409  | 10.78686472 | h | 1 | 0 |
| 36 | 0.85591751  | 2.74913114  | 10.34927148 | h | 1 | 0 |

## 6S\_6

| Center<br>Number | Atomic Coordinates |             |             | Atom | Atomic<br>Number | Atomic<br>Type |
|------------------|--------------------|-------------|-------------|------|------------------|----------------|
|                  | X                  | Y           | Z           |      |                  |                |
| 1                | 5.32405815         | -2.72185871 | -3.67225567 | o    | 8                | 0              |
| 2                | 3.60629715         | -1.58170436 | -2.16091971 | c    | 6                | 0              |
| 3                | 2.85563835         | -3.23627749 | 0.04982321  | c    | 6                | 0              |
| 4                | 3.73394026         | -2.27927327 | 2.68130097  | c    | 6                | 0              |
| 5                | 6.65360462         | -2.35929971 | 2.78791269  | c    | 6                | 0              |
| 6                | 7.67713433         | -0.38718191 | 1.53356659  | o    | 8                | 0              |
| 7                | 10.42087522        | -0.28904551 | 1.43524547  | c    | 6                | 0              |
| 8                | 11.51413129        | 1.05956299  | 3.73559068  | c    | 6                | 0              |

|    |             |             |             |   |   |   |
|----|-------------|-------------|-------------|---|---|---|
| 9  | 10.73489988 | 3.84283511  | 3.96370097  | c | 6 | 0 |
| 10 | 11.83456201 | 5.12358768  | 6.31597068  | c | 6 | 0 |
| 11 | 7.84684937  | -4.0185224  | 3.80818146  | o | 8 | 0 |
| 12 | 2.74592093  | -4.06388624 | 4.39576415  | o | 8 | 0 |
| 13 | 2.70188542  | 0.38358846  | 3.26456652  | c | 6 | 0 |
| 14 | 3.49274418  | 1.27640806  | 5.8623508   | c | 6 | 0 |
| 15 | 2.63974428  | 3.62113289  | 6.34074269  | o | 8 | 0 |
| 16 | 3.26331149  | 4.62311944  | 8.79215039  | c | 6 | 0 |
| 17 | 4.74180911  | 0.05466869  | 7.3616986   | o | 8 | 0 |
| 18 | 2.77878108  | 0.51054717  | -2.59883411 | o | 8 | 0 |
| 19 | 5.68422884  | -1.52802681 | -5.02297368 | h | 1 | 0 |
| 20 | 0.78984686  | -3.32345343 | 0.1042794   | h | 1 | 0 |
| 21 | 3.58150834  | -5.1510357  | -0.19707811 | h | 1 | 0 |
| 22 | 10.83207438 | 0.73490272  | -0.31251891 | h | 1 | 0 |
| 23 | 11.13863729 | -2.21932844 | 1.29496171  | h | 1 | 0 |
| 24 | 10.95897897 | 0.01553591  | 5.43705213  | h | 1 | 0 |
| 25 | 13.58299718 | 0.92007155  | 3.60841953  | h | 1 | 0 |
| 26 | 11.34336169 | 4.86742615  | 2.26276031  | h | 1 | 0 |
| 27 | 8.66654567  | 3.97256149  | 4.00362481  | h | 1 | 0 |
| 28 | 13.90576316 | 5.07353477  | 6.30149895  | h | 1 | 0 |
| 29 | 11.25739608 | 7.10760317  | 6.43410732  | h | 1 | 0 |
| 30 | 11.20238027 | 4.17491827  | 8.04575565  | h | 1 | 0 |
| 31 | 3.69813108  | -3.86932393 | 5.95045724  | h | 1 | 0 |
| 32 | 3.28200676  | 1.76886926  | 1.84906722  | h | 1 | 0 |
| 33 | 0.63292499  | 0.31334327  | 3.20758357  | h | 1 | 0 |
| 34 | 2.39160641  | 6.48765114  | 8.86487751  | h | 1 | 0 |
| 35 | 2.51251284  | 3.40880072  | 10.28442331 | h | 1 | 0 |
| 36 | 5.31146793  | 4.76978114  | 9.0153951   | h | 1 | 0 |

6S\_7

| Center<br>Number | Atomic Coordinates |   |   | Atom | Atomic<br>Number | Atomic<br>Type |
|------------------|--------------------|---|---|------|------------------|----------------|
|                  | X                  | Y | Z |      |                  |                |



|    |             |             |             |   |   |   |
|----|-------------|-------------|-------------|---|---|---|
| 1  | 5.20793499  | -1.59716299 | -2.9628575  | o | 8 | 0 |
| 2  | 3.61454194  | -2.76191565 | -1.33365413 | c | 6 | 0 |
| 3  | 4.98122886  | -3.75689096 | 0.97327716  | c | 6 | 0 |
| 4  | 4.81746482  | -1.96985648 | 3.29347087  | c | 6 | 0 |
| 5  | 5.959694    | 0.62228742  | 2.55113489  | c | 6 | 0 |
| 6  | 8.48557919  | 0.54836228  | 2.47513148  | o | 8 | 0 |
| 7  | 9.73805111  | 2.85659266  | 1.69333874  | c | 6 | 0 |
| 8  | 12.56980566 | 2.37215589  | 1.73391827  | c | 6 | 0 |
| 9  | 13.62498422 | 1.77298592  | 4.36860281  | c | 6 | 0 |
| 10 | 16.47783139 | 1.28252419  | 4.34868735  | c | 6 | 0 |
| 11 | 4.69664571  | 2.47037812  | 2.03855954  | o | 8 | 0 |
| 12 | 6.25495311  | -3.1832248  | 5.18595963  | o | 8 | 0 |
| 13 | 2.06095251  | -1.57184199 | 4.1529017   | c | 6 | 0 |
| 14 | 1.92180822  | 0.07627376  | 6.48614195  | c | 6 | 0 |
| 15 | -0.34866389 | 1.15336859  | 6.75958362  | o | 8 | 0 |
| 16 | -0.66163759 | 2.71553663  | 8.96745763  | c | 6 | 0 |
| 17 | 3.64620544  | 0.36155494  | 7.99682927  | o | 8 | 0 |
| 18 | 1.36152117  | -2.92466415 | -1.71357053 | o | 8 | 0 |
| 19 | 4.16004014  | -0.93949325 | -4.32292208 | h | 1 | 0 |
| 20 | 4.12556815  | -5.55655317 | 1.51505155  | h | 1 | 0 |
| 21 | 6.98123616  | -4.05099663 | 0.56399071  | h | 1 | 0 |
| 22 | 9.18996783  | 4.37392396  | 2.99061178  | h | 1 | 0 |
| 23 | 9.06105961  | 3.36188403  | -0.19485176 | h | 1 | 0 |
| 24 | 13.00242874 | 0.81792565  | 0.42936409  | h | 1 | 0 |
| 25 | 13.50168367 | 4.06155585  | 0.96644619  | h | 1 | 0 |
| 26 | 13.19811332 | 3.35310221  | 5.64692131  | h | 1 | 0 |
| 27 | 12.63124345 | 0.12287376  | 5.12952014  | h | 1 | 0 |
| 28 | 17.18218711 | 0.86322151  | 6.2486812   | h | 1 | 0 |
| 29 | 16.95127745 | -0.3280918  | 3.13490685  | h | 1 | 0 |
| 30 | 17.52192482 | 2.92633874  | 3.63948962  | h | 1 | 0 |
| 31 | 6.04686375  | -2.151583   | 6.69784251  | h | 1 | 0 |
| 32 | 0.89276864  | -0.76339977 | 2.66117535  | h | 1 | 0 |
| 33 | 1.26181706  | -3.42241939 | 4.63505231  | h | 1 | 0 |
| 34 | 0.65744547  | 4.30323433  | 8.91467904  | h | 1 | 0 |
| 35 | -2.60733908 | 3.38574781  | 8.89532226  | h | 1 | 0 |

|    |             |            |             |   |   |   |
|----|-------------|------------|-------------|---|---|---|
| 36 | -0.32922674 | 1.61851445 | 10.68523229 | h | 1 | 0 |
|----|-------------|------------|-------------|---|---|---|

6S\_8

| Center<br>Number | Atomic Coordinates |             |             | Atom | Atomic<br>Number | Atomic<br>Type |
|------------------|--------------------|-------------|-------------|------|------------------|----------------|
|                  | X                  | Y           | Z           |      |                  |                |
| 1                | 4.68628255         | -2.33493571 | -3.47098816 | o    | 8                | 0              |
| 2                | 2.80040183         | -2.51708081 | -1.75472315 | c    | 6                | 0              |
| 3                | 3.58888701         | -4.01895665 | 0.54895732  | c    | 6                | 0              |
| 4                | 4.20611359         | -2.36366633 | 2.89166145  | c    | 6                | 0              |
| 5                | 6.37935589         | -0.53806988 | 2.17610737  | c    | 6                | 0              |
| 6                | 8.65605413         | -1.59034519 | 2.51406257  | o    | 8                | 0              |
| 7                | 10.82701645        | -0.05482306 | 1.84995906  | c    | 6                | 0              |
| 8                | 11.66725764        | 1.57362173  | 4.07328636  | c    | 6                | 0              |
| 9                | 14.05252854        | 3.10725565  | 3.4613283   | c    | 6                | 0              |
| 10               | 14.93703778        | 4.74012779  | 5.68307828  | c    | 6                | 0              |
| 11               | 6.0143649          | 1.56810377  | 1.33490203  | o    | 8                | 0              |
| 12               | 4.92051653         | -4.10821143 | 4.77566318  | o    | 8                | 0              |
| 13               | 1.90524348         | -0.78662203 | 3.73600368  | c    | 6                | 0              |
| 14               | 2.49551383         | 0.73577233  | 6.08343032  | c    | 6                | 0              |
| 15               | 0.78036058         | 2.5503734   | 6.49307439  | o    | 8                | 0              |
| 16               | 1.16139075         | 4.06212005  | 8.72454418  | c    | 6                | 0              |
| 17               | 4.29244078         | 0.35581981  | 7.48421123  | o    | 8                | 0              |
| 18               | 0.74304673         | -1.55947927 | -2.0702937  | o    | 8                | 0              |
| 19               | 4.04357433         | -1.27497497 | -4.82857067 | h    | 1                | 0              |
| 20               | 2.03123105         | -5.2693933  | 1.07589048  | h    | 1                | 0              |
| 21               | 5.25625035         | -5.16191338 | 0.13885372  | h    | 1                | 0              |
| 22               | 10.34740563        | 1.10704773  | 0.21008055  | h    | 1                | 0              |
| 23               | 12.28369432        | -1.42254366 | 1.32454686  | h    | 1                | 0              |
| 24               | 10.11880173        | 2.85063335  | 4.58565977  | h    | 1                | 0              |
| 25               | 12.01186329        | 0.34888905  | 5.71073594  | h    | 1                | 0              |
| 26               | 15.58039715        | 1.81654068  | 2.9028888   | h    | 1                | 0              |
| 27               | 13.68822272        | 4.3183881   | 1.8154283   | h    | 1                | 0              |

|    |             |             |             |   |   |   |
|----|-------------|-------------|-------------|---|---|---|
| 28 | 15.38049094 | 3.57530764  | 7.33741751  | h | 1 | 0 |
| 29 | 16.6360591  | 5.81677192  | 5.19636932  | h | 1 | 0 |
| 30 | 13.47260567 | 6.0924241   | 6.24453645  | h | 1 | 0 |
| 31 | 5.32180935  | -3.09665074 | 6.25807217  | h | 1 | 0 |
| 32 | 1.2442638   | 0.47106869  | 2.24400747  | h | 1 | 0 |
| 33 | 0.35091335  | -2.08044435 | 4.18573419  | h | 1 | 0 |
| 34 | -0.41286713 | 5.38908677  | 8.76553748  | h | 1 | 0 |
| 35 | 1.15922172  | 2.87488487  | 10.41426759 | h | 1 | 0 |
| 36 | 2.95973519  | 5.07021016  | 8.61158155  | h | 1 | 0 |

## 6S\_9

| Center<br>Number | Atomic Coordinates |             |             | Atom | Atomic<br>Number | Atomic<br>Type |
|------------------|--------------------|-------------|-------------|------|------------------|----------------|
|                  | X                  | Y           | Z           |      |                  |                |
| 1                | 5.05638923         | -0.81910478 | -3.20394753 | o    | 8                | 0              |
| 2                | 3.48123057         | -2.06054241 | -1.61835594 | c    | 6                | 0              |
| 3                | 4.90274793         | -3.40190874 | 0.47079976  | c    | 6                | 0              |
| 4                | 4.7931177          | -2.02436548 | 3.05938123  | c    | 6                | 0              |
| 5                | 5.92948904         | 0.65069471  | 2.71816072  | c    | 6                | 0              |
| 6                | 8.43852214         | 0.67682653  | 3.02725917  | o    | 8                | 0              |
| 7                | 9.66715471         | 3.09612314  | 2.63846255  | c    | 6                | 0              |
| 8                | 12.48033009        | 2.7409837   | 3.10383531  | c    | 6                | 0              |
| 9                | 13.76759445        | 0.93100331  | 1.23882083  | c    | 6                | 0              |
| 10               | 16.60227867        | 0.62990921  | 1.74342249  | c    | 6                | 0              |
| 11               | 4.6686322          | 2.48729454  | 2.16001439  | o    | 8                | 0              |
| 12               | 6.24711469         | -3.54900847 | 4.69180713  | o    | 8                | 0              |
| 13               | 2.05403089         | -1.75726397 | 4.02275651  | c    | 6                | 0              |
| 14               | 1.97515146         | -0.51889462 | 6.5990729   | c    | 6                | 0              |
| 15               | -0.33936303        | 0.32387412  | 7.17648363  | o    | 8                | 0              |
| 16               | -0.60380569        | 1.482811    | 9.62558612  | c    | 6                | 0              |
| 17               | 3.78095994         | -0.3308548  | 8.02649777  | o    | 8                | 0              |
| 18               | 1.2052768          | -2.05724889 | -1.88046633 | o    | 8                | 0              |
| 19               | 3.98248629         | 0.0496672   | -4.4171627  | h    | 1                | 0              |

|    |             |             |             |   |   |   |
|----|-------------|-------------|-------------|---|---|---|
| 20 | 4.06184271  | -5.27058972 | 0.73540164  | h | 1 | 0 |
| 21 | 6.89098318  | -3.62798035 | -0.03016429 | h | 1 | 0 |
| 22 | 8.83280687  | 4.47287733  | 3.93699433  | h | 1 | 0 |
| 23 | 9.27116081  | 3.72890245  | 0.70709287  | h | 1 | 0 |
| 24 | 13.36881966 | 4.61474274  | 2.99440994  | h | 1 | 0 |
| 25 | 12.75925882 | 2.06998531  | 5.04701042  | h | 1 | 0 |
| 26 | 12.83553062 | -0.91563792 | 1.34290334  | h | 1 | 0 |
| 27 | 13.47353904 | 1.6259484   | -0.69617479 | h | 1 | 0 |
| 28 | 16.94831882 | -0.12066763 | 3.64301404  | h | 1 | 0 |
| 29 | 17.4736237  | -0.66892138 | 0.38854872  | h | 1 | 0 |
| 30 | 17.59132817 | 2.44491802  | 1.60008117  | h | 1 | 0 |
| 31 | 6.18030238  | -2.71811756 | 6.33180625  | h | 1 | 0 |
| 32 | 0.87619891  | -0.69564526 | 2.70756168  | h | 1 | 0 |
| 33 | 1.23198803  | -3.65119065 | 4.19776709  | h | 1 | 0 |
| 34 | -2.58823551 | 2.01337979  | 9.77134796  | h | 1 | 0 |
| 35 | -0.0929495  | 0.1495811   | 11.11762324 | h | 1 | 0 |
| 36 | 0.60727151  | 3.14897143  | 9.76662206  | h | 1 | 0 |

# 6S\_10

| Center<br>Number | Atomic Coordinates |             |             | Atom | Atomic<br>Number | Atomic<br>Type |
|------------------|--------------------|-------------|-------------|------|------------------|----------------|
|                  | X                  | Y           | Z           |      |                  |                |
| 1                | 5.96876721         | -0.4155787  | -2.76995367 | o    | 8                | 0              |
| 2                | 3.80744365         | -1.15124399 | -1.61447494 | c    | 6                | 0              |
| 3                | 4.26780225         | -3.20367014 | 0.32432814  | c    | 6                | 0              |
| 4                | 4.23915152         | -2.25030242 | 3.10003091  | c    | 6                | 0              |
| 5                | 6.32714924         | -0.21902233 | 3.37332026  | c    | 6                | 0              |
| 6                | 8.57651158         | -1.23289982 | 3.93661206  | o    | 8                | 0              |
| 7                | 10.70157514        | 0.49255353  | 4.06786235  | c    | 6                | 0              |
| 8                | 11.96808659        | 0.76419243  | 1.4936831   | c    | 6                | 0              |
| 9                | 14.26300388        | 2.53590744  | 1.59027788  | c    | 6                | 0              |
| 10               | 15.57656719        | 2.81264377  | -0.97539308 | c    | 6                | 0              |
| 11               | 5.93899362         | 2.018956    | 3.02711528  | o    | 8                | 0              |

|    |             |             |             |   |   |   |
|----|-------------|-------------|-------------|---|---|---|
| 12 | 4.72676578  | -4.42494634 | 4.55965487  | o | 8 | 0 |
| 13 | 1.67503045  | -1.05698085 | 3.8054284   | c | 6 | 0 |
| 14 | 1.63295625  | -0.23276351 | 6.54323848  | c | 6 | 0 |
| 15 | -0.25726951 | 1.37985497  | 7.02126642  | o | 8 | 0 |
| 16 | -0.47256642 | 2.223085    | 9.6007609   | c | 6 | 0 |
| 17 | 3.10942635  | -0.96479048 | 8.16100098  | o | 8 | 0 |
| 18 | 1.76885784  | -0.23186306 | -2.11065396 | o | 8 | 0 |
| 19 | 5.50068979  | 0.95084543  | -3.90726617 | h | 1 | 0 |
| 20 | 2.76830832  | -4.61412175 | 0.14577244  | h | 1 | 0 |
| 21 | 6.0881237   | -4.11895478 | 0.00086304  | h | 1 | 0 |
| 22 | 11.97764367 | -0.35755253 | 5.45300681  | h | 1 | 0 |
| 23 | 10.03671575 | 2.31728592  | 4.77092927  | h | 1 | 0 |
| 24 | 12.54829044 | -1.11237161 | 0.82743179  | h | 1 | 0 |
| 25 | 10.5746748  | 1.4795481   | 0.13738114  | h | 1 | 0 |
| 26 | 13.66044495 | 4.4046449   | 2.26381154  | h | 1 | 0 |
| 27 | 15.62487925 | 1.82939058  | 2.98973228  | h | 1 | 0 |
| 28 | 17.20065659 | 4.08932272  | -0.85589754 | h | 1 | 0 |
| 29 | 16.26154157 | 0.98434055  | -1.6667645  | h | 1 | 0 |
| 30 | 14.27987876 | 3.57337417  | -2.39999408 | h | 1 | 0 |
| 31 | 4.70359106  | -3.85945488 | 6.31008611  | h | 1 | 0 |
| 32 | 1.2098943   | 0.54269738  | 2.5931826   | h | 1 | 0 |
| 33 | 0.19335885  | -2.48151569 | 3.54265546  | h | 1 | 0 |
| 34 | 1.24199562  | 3.21852682  | 10.17734478 | h | 1 | 0 |
| 35 | -2.09429007 | 3.4917161   | 9.63122506  | h | 1 | 0 |
| 36 | -0.77760577 | 0.61880271  | 10.86500072 | h | 1 | 0 |

6S\_11

| Center<br>Number | Atomic Coordinates |             |             | Atom | Atomic<br>Number | Atomic<br>Type |
|------------------|--------------------|-------------|-------------|------|------------------|----------------|
|                  | X                  | Y           | Z           |      |                  |                |
| 1                | 4.85195626         | 0.97032978  | -2.99926088 | o    | 8                | 0              |
| 2                | 4.88858173         | -0.86613001 | -1.23418807 | c    | 6                | 0              |
| 3                | 3.11759243         | -0.32462834 | 0.93509101  | c    | 6                | 0              |

|    |             |             |             |   |   |   |
|----|-------------|-------------|-------------|---|---|---|
| 4  | 3.59087161  | -2.12651013 | 3.17961601  | c | 6 | 0 |
| 5  | 6.34811345  | -1.93313475 | 4.14183386  | c | 6 | 0 |
| 6  | 7.12881551  | 0.49978195  | 4.21762161  | o | 8 | 0 |
| 7  | 9.68715712  | 0.93688121  | 5.11668484  | c | 6 | 0 |
| 8  | 11.60174919 | 0.77605649  | 2.9681866   | c | 6 | 0 |
| 9  | 11.26585107 | 2.79883765  | 0.91737306  | c | 6 | 0 |
| 10 | 13.19407491 | 2.54334724  | -1.22751751 | c | 6 | 0 |
| 11 | 7.60967471  | -3.72402162 | 4.78365014  | o | 8 | 0 |
| 12 | 3.06915165  | -4.64510771 | 2.49228946  | o | 8 | 0 |
| 13 | 1.7682279   | -1.58597739 | 5.41101547  | c | 6 | 0 |
| 14 | 1.93900542  | 1.06158692  | 6.49139032  | c | 6 | 0 |
| 15 | 2.9913589   | 1.05172156  | 8.8137075   | o | 8 | 0 |
| 16 | 3.25493967  | 3.49349366  | 9.97696745  | c | 6 | 0 |
| 17 | 1.21660798  | 2.96632255  | 5.43659376  | o | 8 | 0 |
| 18 | 6.21984439  | -2.73372199 | -1.43623407 | o | 8 | 0 |
| 19 | 6.00335242  | 0.43793691  | -4.33008034 | h | 1 | 0 |
| 20 | 3.25784962  | 1.65952134  | 1.47731515  | h | 1 | 0 |
| 21 | 1.18111545  | -0.62597961 | 0.2596322   | h | 1 | 0 |
| 22 | 10.10652737 | -0.44580302 | 6.59068522  | h | 1 | 0 |
| 23 | 9.62586744  | 2.83333002  | 5.93672198  | h | 1 | 0 |
| 24 | 13.49313955 | 0.94485939  | 3.81087611  | h | 1 | 0 |
| 25 | 11.5002504  | -1.11900599 | 2.13597923  | h | 1 | 0 |
| 26 | 9.34679561  | 2.6874197   | 0.14283347  | h | 1 | 0 |
| 27 | 11.42811158 | 4.68107831  | 1.78013844  | h | 1 | 0 |
| 28 | 13.02650489 | 0.70457402  | -2.16702267 | h | 1 | 0 |
| 29 | 12.92662724 | 4.01286489  | -2.66010787 | h | 1 | 0 |
| 30 | 15.13428334 | 2.70409591  | -0.51894681 | h | 1 | 0 |
| 31 | 4.39147473  | -5.14357643 | 1.32197344  | h | 1 | 0 |
| 32 | -0.15421607 | -1.86679744 | 4.70144231  | h | 1 | 0 |
| 33 | 2.14009169  | -2.99234942 | 6.87323164  | h | 1 | 0 |
| 34 | 4.1065669   | 3.14248249  | 11.81957372 | h | 1 | 0 |
| 35 | 4.46843028  | 4.71118382  | 8.83158867  | h | 1 | 0 |
| 36 | 1.41160677  | 4.40081515  | 10.18792141 | h | 1 | 0 |

6S\_12

| Center<br>Number | Atomic Coordinates |             |             | Atom | Atomic<br>Number | Atomic<br>Type |
|------------------|--------------------|-------------|-------------|------|------------------|----------------|
|                  | X                  | Y           | Z           |      |                  |                |
| 1                | 4.27905961         | -0.51221766 | -3.80226719 | o    | 8                | 0              |
| 2                | 4.33329988         | -1.94570572 | -1.69816177 | c    | 6                | 0              |
| 3                | 3.1542631          | -0.62929771 | 0.54037433  | c    | 6                | 0              |
| 4                | 3.48117108         | -2.17474972 | 2.98947834  | c    | 6                | 0              |
| 5                | 6.30466809         | -2.61603473 | 3.6269067   | c    | 6                | 0              |
| 6                | 7.69943814         | -0.53167256 | 3.16332179  | o    | 8                | 0              |
| 7                | 10.37521707        | -0.71355864 | 3.73405997  | c    | 6                | 0              |
| 8                | 11.65709767        | 1.65837374  | 2.73891781  | c    | 6                | 0              |
| 9                | 10.78431921        | 4.11485433  | 4.01116216  | c    | 6                | 0              |
| 10               | 12.12925717        | 6.45603992  | 2.96527271  | c    | 6                | 0              |
| 11               | 7.1396103          | -4.56217114 | 4.48056392  | o    | 8                | 0              |
| 12               | 2.2481227          | -4.52916706 | 2.78523953  | o    | 8                | 0              |
| 13               | 2.18942751         | -0.88771843 | 5.28109694  | c    | 6                | 0              |
| 14               | 3.15158624         | 1.7264507   | 5.95728709  | c    | 6                | 0              |
| 15               | 3.94038925         | 1.80885517  | 8.37904204  | o    | 8                | 0              |
| 16               | 4.80060787         | 4.23735577  | 9.24827094  | c    | 6                | 0              |
| 17               | 3.17139566         | 3.54807273  | 4.56024644  | o    | 8                | 0              |
| 18               | 5.2299044          | -4.06608567 | -1.68117681 | o    | 8                | 0              |
| 19               | 5.03281389         | -1.52341237 | -5.13974455 | h    | 1                | 0              |
| 20               | 3.91836616         | 1.27806585  | 0.71802268  | h    | 1                | 0              |
| 21               | 1.12742833         | -0.4268818  | 0.1574365   | h    | 1                | 0              |
| 22               | 11.11787253        | -2.42794092 | 2.8503999   | h    | 1                | 0              |
| 23               | 10.5946033         | -0.91295673 | 5.78425824  | h    | 1                | 0              |
| 24               | 13.70190143        | 1.41633517  | 3.00805432  | h    | 1                | 0              |
| 25               | 11.34520752        | 1.7766325   | 0.69093086  | h    | 1                | 0              |
| 26               | 8.73651538         | 4.31613084  | 3.7702766   | h    | 1                | 0              |
| 27               | 11.12909336        | 3.97255457  | 6.0557327   | h    | 1                | 0              |
| 28               | 11.77366326        | 6.67767204  | 0.93664863  | h    | 1                | 0              |
| 29               | 11.47842007        | 8.18088671  | 3.90473269  | h    | 1                | 0              |
| 30               | 14.18054365        | 6.32990264  | 3.23027096  | h    | 1                | 0              |

|    |            |             |             |   |   |   |
|----|------------|-------------|-------------|---|---|---|
| 31 | 3.24857223 | -5.53377727 | 1.62174794  | h | 1 | 0 |
| 32 | 0.17640048 | -0.72238452 | 4.82283248  | h | 1 | 0 |
| 33 | 2.37021277 | -2.15551348 | 6.897177    | h | 1 | 0 |
| 34 | 3.33364891 | 5.66586956  | 8.98021823  | h | 1 | 0 |
| 35 | 5.22209398 | 3.99115643  | 11.24939787 | h | 1 | 0 |
| 36 | 6.49406089 | 4.81599965  | 8.21721342  | h | 1 | 0 |

### 6S\_13

| Center<br>Number | Atomic Coordinates |             |             | Atom | Atomic<br>Number | Atomic<br>Type |
|------------------|--------------------|-------------|-------------|------|------------------|----------------|
|                  | X                  | Y           | Z           |      |                  |                |
| 1                | 6.14763572         | -1.59604692 | -3.09914369 | o    | 8                | 0              |
| 2                | 4.10159424         | -0.84054538 | -1.76288914 | c    | 6                | 0              |
| 3                | 3.13622812         | -2.89296454 | -0.01944455 | c    | 6                | 0              |
| 4                | 3.51841492         | -2.37915518 | 2.84501817  | c    | 6                | 0              |
| 5                | 6.38717468         | -2.346659   | 3.41177657  | c    | 6                | 0              |
| 6                | 7.44514464         | -0.14238936 | 2.68380688  | o    | 8                | 0              |
| 7                | 10.16259683        | 0.03232269  | 2.97204961  | c    | 6                | 0              |
| 8                | 10.9894126         | 2.59389363  | 1.96812132  | c    | 6                | 0              |
| 9                | 13.85745568        | 2.97535802  | 2.16995426  | c    | 6                | 0              |
| 10               | 14.72143496        | 5.5495697   | 1.16396175  | c    | 6                | 0              |
| 11               | 7.54335525         | -4.09147885 | 4.32291205  | o    | 8                | 0              |
| 12               | 2.40498183         | -4.47932276 | 4.04243158  | o    | 8                | 0              |
| 13               | 2.22459797         | 0.09708741  | 3.68239224  | c    | 6                | 0              |
| 14               | 2.46911943         | 0.51794311  | 6.49974101  | c    | 6                | 0              |
| 15               | 1.51926733         | 2.76795033  | 7.19398197  | o    | 8                | 0              |
| 16               | 1.61829204         | 3.31523576  | 9.85763855  | c    | 6                | 0              |
| 17               | 3.39002535         | -0.97798812 | 7.98929549  | o    | 8                | 0              |
| 18               | 3.17731675         | 1.24257983  | -2.00503123 | o    | 8                | 0              |
| 19               | 6.61637018         | -0.16819373 | -4.15775219 | h    | 1                | 0              |
| 20               | 1.09948596         | -3.07958776 | -0.32560143 | h    | 1                | 0              |
| 21               | 4.030297           | -4.69920663 | -0.45899087 | h    | 1                | 0              |
| 22               | 11.03879386        | -1.52807328 | 1.93259008  | h    | 1                | 0              |



|    |             |             |             |   |   |   |
|----|-------------|-------------|-------------|---|---|---|
| 23 | 10.63148903 | -0.20827404 | 4.97348163  | h | 1 | 0 |
| 24 | 10.39066981 | 2.766111    | -0.01065887 | h | 1 | 0 |
| 25 | 10.00082965 | 4.08564685  | 3.01626868  | h | 1 | 0 |
| 26 | 14.44114854 | 2.77598117  | 4.15211809  | h | 1 | 0 |
| 27 | 14.82895452 | 1.464239    | 1.12976056  | h | 1 | 0 |
| 28 | 13.83741495 | 7.09942325  | 2.21569359  | h | 1 | 0 |
| 29 | 16.77249481 | 5.76840509  | 1.32484831  | h | 1 | 0 |
| 30 | 14.21768711 | 5.78226371  | -0.83179507 | h | 1 | 0 |
| 31 | 2.95307261  | -4.41733895 | 5.79253788  | h | 1 | 0 |
| 32 | 2.95555277  | 1.73848672  | 2.66917714  | h | 1 | 0 |
| 33 | 0.20755678  | -0.02948752 | 3.22763401  | h | 1 | 0 |
| 34 | 3.57477402  | 3.34698156  | 10.51825902 | h | 1 | 0 |
| 35 | 0.74946275  | 5.17011248  | 10.07289867 | h | 1 | 0 |
| 36 | 0.57375053  | 1.8924075   | 10.92989872 | h | 1 | 0 |

#### 6S\_14

| Center<br>Number | Atomic Coordinates |             |             | Atom | Atomic<br>Number | Atomic<br>Type |
|------------------|--------------------|-------------|-------------|------|------------------|----------------|
|                  | X                  | Y           | Z           |      |                  |                |
| 1                | 4.97530916         | 1.17256509  | -2.95119533 | o    | 8                | 0              |
| 2                | 4.84503399         | -0.75800459 | -1.29592602 | c    | 6                | 0              |
| 3                | 3.1286921          | -0.19299214 | 0.91044873  | c    | 6                | 0              |
| 4                | 3.54348744         | -2.08387533 | 3.0922161   | c    | 6                | 0              |
| 5                | 6.32903514         | -2.10011197 | 3.99424377  | c    | 6                | 0              |
| 6                | 7.35264735         | 0.23799857  | 3.89111927  | o    | 8                | 0              |
| 7                | 9.95881511         | 0.45085638  | 4.71423242  | c    | 6                | 0              |
| 8                | 10.95601093        | 3.0204744   | 3.89276104  | c    | 6                | 0              |
| 9                | 10.9662197         | 3.48597527  | 1.02242593  | c    | 6                | 0              |
| 10               | 12.5558042         | 1.59567362  | -0.49582667 | c    | 6                | 0              |
| 11               | 7.42982591         | -3.95797587 | 4.73170298  | o    | 8                | 0              |
| 12               | 2.83819637         | -4.54308612 | 2.35295058  | o    | 8                | 0              |
| 13               | 1.8228575          | -1.48412387 | 5.38812947  | c    | 6                | 0              |
| 14               | 2.2391055          | 1.10698296  | 6.53436076  | c    | 6                | 0              |

|    |             |             |             |   |   |   |
|----|-------------|-------------|-------------|---|---|---|
| 15 | 3.5098322   | 0.95760095  | 8.74043348  | o | 8 | 0 |
| 16 | 4.025628    | 3.33901747  | 9.94411215  | c | 6 | 0 |
| 17 | 1.53563852  | 3.08545183  | 5.61052576  | o | 8 | 0 |
| 18 | 5.998904    | -2.72577854 | -1.6141094  | o | 8 | 0 |
| 19 | 6.07714205  | 0.61788072  | -4.31465723 | h | 1 | 0 |
| 20 | 3.36954559  | 1.7655687   | 1.50595535  | h | 1 | 0 |
| 21 | 1.17160894  | -0.38784586 | 0.25486089  | h | 1 | 0 |
| 22 | 11.03105972 | -1.11528021 | 3.89983193  | h | 1 | 0 |
| 23 | 10.00817143 | 0.23921157  | 6.7728129   | h | 1 | 0 |
| 24 | 9.84472761  | 4.5018723   | 4.82547832  | h | 1 | 0 |
| 25 | 12.89031965 | 3.1812018   | 4.63201427  | h | 1 | 0 |
| 26 | 9.01713669  | 3.47037677  | 0.31988224  | h | 1 | 0 |
| 27 | 11.6811227  | 5.4037887   | 0.69128239  | h | 1 | 0 |
| 28 | 11.75875667 | -0.31347544 | -0.4312599  | h | 1 | 0 |
| 29 | 12.65397217 | 2.15216051  | -2.48714099 | h | 1 | 0 |
| 30 | 14.49933291 | 1.49486152  | 0.21649969  | h | 1 | 0 |
| 31 | 4.05416252  | -5.06525254 | 1.0812892   | h | 1 | 0 |
| 32 | -0.13401685 | -1.59126452 | 4.72944747  | h | 1 | 0 |
| 33 | 2.13387813  | -2.96053164 | 6.79451803  | h | 1 | 0 |
| 34 | 5.02330528  | 2.87692499  | 11.68599977 | h | 1 | 0 |
| 35 | 5.19656426  | 4.52590135  | 8.72427149  | h | 1 | 0 |
| 36 | 2.26676204  | 4.34015024  | 10.35642075 | h | 1 | 0 |

6S\_15

| Center<br>Number | Atomic Coordinates |             |             | Atom | Atomic<br>Number | Atomic<br>Type |
|------------------|--------------------|-------------|-------------|------|------------------|----------------|
|                  | X                  | Y           | Z           |      |                  |                |
| 1                | 1.478787           | -1.75228495 | -3.48573359 | o    | 8                | 0              |
| 2                | 2.97005126         | -2.56684582 | -1.59712703 | c    | 6                | 0              |
| 3                | 2.07597347         | -1.67951803 | 0.96350011  | c    | 6                | 0              |
| 4                | 4.08727595         | -2.15938182 | 3.018508    | c    | 6                | 0              |
| 5                | 6.44644954         | -0.54131654 | 2.4111038   | c    | 6                | 0              |
| 6                | 8.59501091         | -1.67286447 | 3.1233624   | o    | 8                | 0              |

|    |             |             |             |   |   |   |
|----|-------------|-------------|-------------|---|---|---|
| 7  | 10.90712691 | -0.24051704 | 2.78742842  | c | 6 | 0 |
| 8  | 11.49038918 | 1.33100511  | 5.13201985  | c | 6 | 0 |
| 9  | 13.97508838 | 2.80380914  | 4.8679049   | c | 6 | 0 |
| 10 | 14.59962335 | 4.3829717   | 7.21365436  | c | 6 | 0 |
| 11 | 6.30606986  | 1.5483383   | 1.46550242  | o | 8 | 0 |
| 12 | 4.64302163  | -4.75607576 | 3.23657052  | o | 8 | 0 |
| 13 | 3.12612063  | -1.37795334 | 5.6782892   | c | 6 | 0 |
| 14 | 2.41643943  | 1.38927128  | 5.88185142  | c | 6 | 0 |
| 15 | 4.21837497  | 2.73058823  | 7.08842978  | o | 8 | 0 |
| 16 | 3.76996337  | 5.41058627  | 7.21783751  | c | 6 | 0 |
| 17 | 0.48495068  | 2.31024324  | 5.05743885  | o | 8 | 0 |
| 18 | 4.8108298   | -3.90308369 | -1.97602925 | o | 8 | 0 |
| 19 | 2.17765767  | -2.44009624 | -5.04097914 | h | 1 | 0 |
| 20 | 1.54662724  | 0.30951649  | 0.85629404  | h | 1 | 0 |
| 21 | 0.36197916  | -2.74088513 | 1.44283627  | h | 1 | 0 |
| 22 | 10.71560469 | 0.95406811  | 1.1133177   | h | 1 | 0 |
| 23 | 12.36153157 | -1.66930083 | 2.45361919  | h | 1 | 0 |
| 24 | 9.91933801  | 2.64123318  | 5.4617212   | h | 1 | 0 |
| 25 | 11.58324629 | 0.07366596  | 6.77913009  | h | 1 | 0 |
| 26 | 15.52871458 | 1.47755526  | 4.49553599  | h | 1 | 0 |
| 27 | 13.86536459 | 4.04504927  | 3.20764423  | h | 1 | 0 |
| 28 | 14.78481591 | 3.18663778  | 8.89437446  | h | 1 | 0 |
| 29 | 16.37803228 | 5.41369445  | 6.97511489  | h | 1 | 0 |
| 30 | 13.11216205 | 5.77255201  | 7.59561084  | h | 1 | 0 |
| 31 | 5.31979259  | -5.2624691  | 1.60512288  | h | 1 | 0 |
| 32 | 1.4487238   | -2.51569715 | 6.08203028  | h | 1 | 0 |
| 33 | 4.6004726   | -1.8566977  | 7.03964304  | h | 1 | 0 |
| 34 | 5.34493781  | 6.18554099  | 8.29584077  | h | 1 | 0 |
| 35 | 3.72364943  | 6.21557644  | 5.31648956  | h | 1 | 0 |
| 36 | 1.97607578  | 5.80231333  | 8.16255766  | h | 1 | 0 |

| Center<br>Number | Atomic Coordinates |             |             | Atom | Atomic<br>Number | Atomic<br>Type |
|------------------|--------------------|-------------|-------------|------|------------------|----------------|
|                  | X                  | Y           | Z           |      |                  |                |
| 1                | 1.22149725         | -1.53885569 | -3.23725669 | o    | 8                | 0              |
| 2                | 2.98842446         | -2.16412976 | -1.52306152 | c    | 6                | 0              |
| 3                | 2.02852891         | -1.98083033 | 1.1579837   | c    | 6                | 0              |
| 4                | 4.21111376         | -2.14549072 | 3.08408827  | c    | 6                | 0              |
| 5                | 5.95893366         | 0.17045018  | 2.70904043  | c    | 6                | 0              |
| 6                | 8.3672441          | -0.33548481 | 3.28665551  | o    | 8                | 0              |
| 7                | 10.11049732        | 1.76561993  | 3.08002375  | c    | 6                | 0              |
| 8                | 12.71901931        | 0.80879316  | 3.81078754  | c    | 6                | 0              |
| 9                | 14.73196412        | 2.89206852  | 3.66042043  | c    | 6                | 0              |
| 10               | 17.37219586        | 1.95494202  | 4.39282188  | c    | 6                | 0              |
| 11               | 5.185795           | 2.22686067  | 2.03724966  | o    | 8                | 0              |
| 12               | 5.51474869         | -4.46030815 | 2.86946809  | o    | 8                | 0              |
| 13               | 3.22110407         | -2.1004259  | 5.84494522  | c    | 6                | 0              |
| 14               | 1.79320422         | 0.29109678  | 6.51056907  | c    | 6                | 0              |
| 15               | 3.24045479         | 1.88582364  | 7.87422002  | o    | 8                | 0              |
| 16               | 2.10346925         | 4.29282904  | 8.43029625  | c    | 6                | 0              |
| 17               | -0.36474258        | 0.74904943  | 5.88452815  | o    | 8                | 0              |
| 18               | 5.10883663         | -2.83447379 | -2.13510972 | o    | 8                | 0              |
| 19               | 1.99717674         | -1.7462778  | -4.89123596 | h    | 1                | 0              |
| 20               | 0.9363407          | -0.24688481 | 1.38120334  | h    | 1                | 0              |
| 21               | 0.73282882         | -3.56493518 | 1.4799271   | h    | 1                | 0              |
| 22               | 9.46278163         | 3.28854767  | 4.32406983  | h    | 1                | 0              |
| 23               | 10.06004872        | 2.4810551   | 1.13853016  | h    | 1                | 0              |
| 24               | 12.64049542        | 0.03721998  | 5.73410286  | h    | 1                | 0              |
| 25               | 13.23396333        | -0.76460426 | 2.56164886  | h    | 1                | 0              |
| 26               | 14.78247596        | 3.66543893  | 1.73452237  | h    | 1                | 0              |
| 27               | 14.18922999        | 4.46754589  | 4.89925955  | h    | 1                | 0              |
| 28               | 17.99427926        | 0.4219356   | 3.14669376  | h    | 1                | 0              |
| 29               | 18.77038974        | 3.47503901  | 4.26765351  | h    | 1                | 0              |
| 30               | 17.39808864        | 1.23210737  | 6.33351389  | h    | 1                | 0              |
| 31               | 6.18997891         | -4.49713086 | 1.1609002   | h    | 1                | 0              |
| 32               | 1.94911975         | -3.71289632 | 6.07097041  | h    | 1                | 0              |

|    |            |            |            |   |   |   |
|----|------------|------------|------------|---|---|---|
| 33 | 4.84609064 | -2.3502943 | 7.09147239 | h | 1 | 0 |
| 34 | 3.48225481 | 5.30633083 | 9.5771636  | h | 1 | 0 |
| 35 | 1.72049064 | 5.31841319 | 6.67912546 | h | 1 | 0 |
| 36 | 0.33606905 | 4.04022338 | 9.46785875 | h | 1 | 0 |

---
